# Supplementary material
Source: PubMed Central journal article supplement (PMC6703555)
Supplement: NIHMS1044015-supplement-Supplemental_Information.pdf [file NIHMS1044015-supplement-Supplemental_Information.pdf]

Supporting Information for:

# Phosphoramidate prodrugs of a butyrophilin ligand display extended serum stability and potent V $\gamma$ 9V $\delta$ 2 T cell stimulation

Nicholas A. Lentini,<sup>1</sup> Benjamin J. Foust,<sup>1</sup> Chia-Hung Christine Hsiao,<sup>2</sup> Andrew J. Wiemer,<sup>2,3\*</sup>

and David F. Wiemer<sup>1,4\*</sup>

<sup>1</sup>*Department of Chemistry, University of Iowa, Iowa City, Iowa 52242-1294, United States*

<sup>2</sup>*Department of Pharmaceutical Sciences, University of Connecticut, Storrs, CT 06269-3092, United States*

<sup>3</sup>*Institute for Systems Genomics, University of Connecticut, Storrs, CT 06269-3092, United States*

<sup>4</sup>*Department of Pharmacology, University of Iowa, Iowa City, Iowa 52242-1109, United States*

## Supplemental Table of Contents

|                                                              |     |
|--------------------------------------------------------------|-----|
| <sup>1</sup> H NMR spectrum of compound <b>6c</b> (300 MHz)  | S3  |
| <sup>13</sup> C NMR spectrum of compound <b>6c</b> (75 MHz)  | S4  |
| <sup>31</sup> P NMR spectrum of compound <b>6c</b> (121 MHz) | S5  |
| <sup>1</sup> H NMR spectrum of compound <b>9b</b> (500 MHz)  | S6  |
| <sup>13</sup> C NMR spectrum of compound <b>9b</b> (125 MHz) | S7  |
| <sup>31</sup> P NMR spectrum of compound <b>9b</b> (202MHz)  | S8  |
| <sup>1</sup> H NMR spectrum of compound <b>9a</b> (500 MHz)  | S9  |
| <sup>13</sup> C NMR spectrum of compound <b>9a</b> (125 MHz) | S10 |

|                                                              |     |
|--------------------------------------------------------------|-----|
| <sup>31</sup> P NMR spectrum of compound <b>9a</b> (161 MHz) | S11 |
| <sup>1</sup> H NMR spectrum of compound <b>9c</b> (400 MHz)  | S12 |
| <sup>13</sup> C NMR spectrum of compound <b>9c</b> (100 MHz) | S13 |
| <sup>31</sup> P NMR spectrum of compound <b>9c</b> (202 MHz) | S14 |
| <sup>1</sup> H NMR spectrum of compound <b>9d</b> (400 MHz)  | S15 |
| <sup>13</sup> C NMR spectrum of compound <b>9d</b> (100 MHz) | S16 |
| <sup>31</sup> P NMR spectrum of compound <b>9d</b> (161 MHz) | S17 |
| <sup>1</sup> H NMR spectrum of compound <b>9e</b> (400 MHz)  | S18 |
| <sup>13</sup> C NMR spectrum of compound <b>9e</b> (100 MHz) | S19 |
| <sup>31</sup> P NMR spectrum of compound <b>9e</b> (161 MHz) | S20 |
| <sup>1</sup> H NMR spectrum of compound <b>9f</b> (400 MHz)  | S21 |
| <sup>13</sup> C NMR spectrum of compound <b>9f</b> (100 MHz) | S22 |
| <sup>31</sup> P NMR spectrum of compound <b>9f</b> (161 MHz) | S23 |
| <sup>1</sup> H NMR spectrum of compound <b>9g</b> (400 MHz)  | S24 |
| <sup>13</sup> C NMR spectrum of compound <b>9g</b> (100 MHz) | S25 |
| <sup>31</sup> P NMR spectrum of compound <b>9g</b> (161 MHz) | S26 |
| <sup>1</sup> H NMR spectrum of compound <b>9h</b> (500 MHz)  | S27 |
| <sup>13</sup> C NMR spectrum of compound <b>9h</b> (125 MHz) | S28 |
| <sup>31</sup> P NMR spectrum of compound <b>9h</b> (202 MHz) | S29 |
| <sup>1</sup> H NMR spectrum of compound <b>9i</b> (500 MHz)  | S30 |
| <sup>13</sup> C NMR spectrum of compound <b>9i</b> (125 MHz) | S31 |
| <sup>31</sup> P NMR spectrum of compound <b>9i</b> (161 MHz) | S32 |
| HPLC traces for assayed compounds <b>9a - 9i</b> .           | S33 |

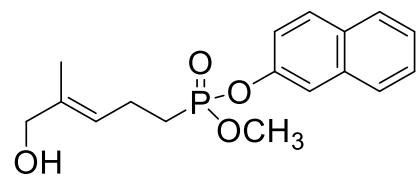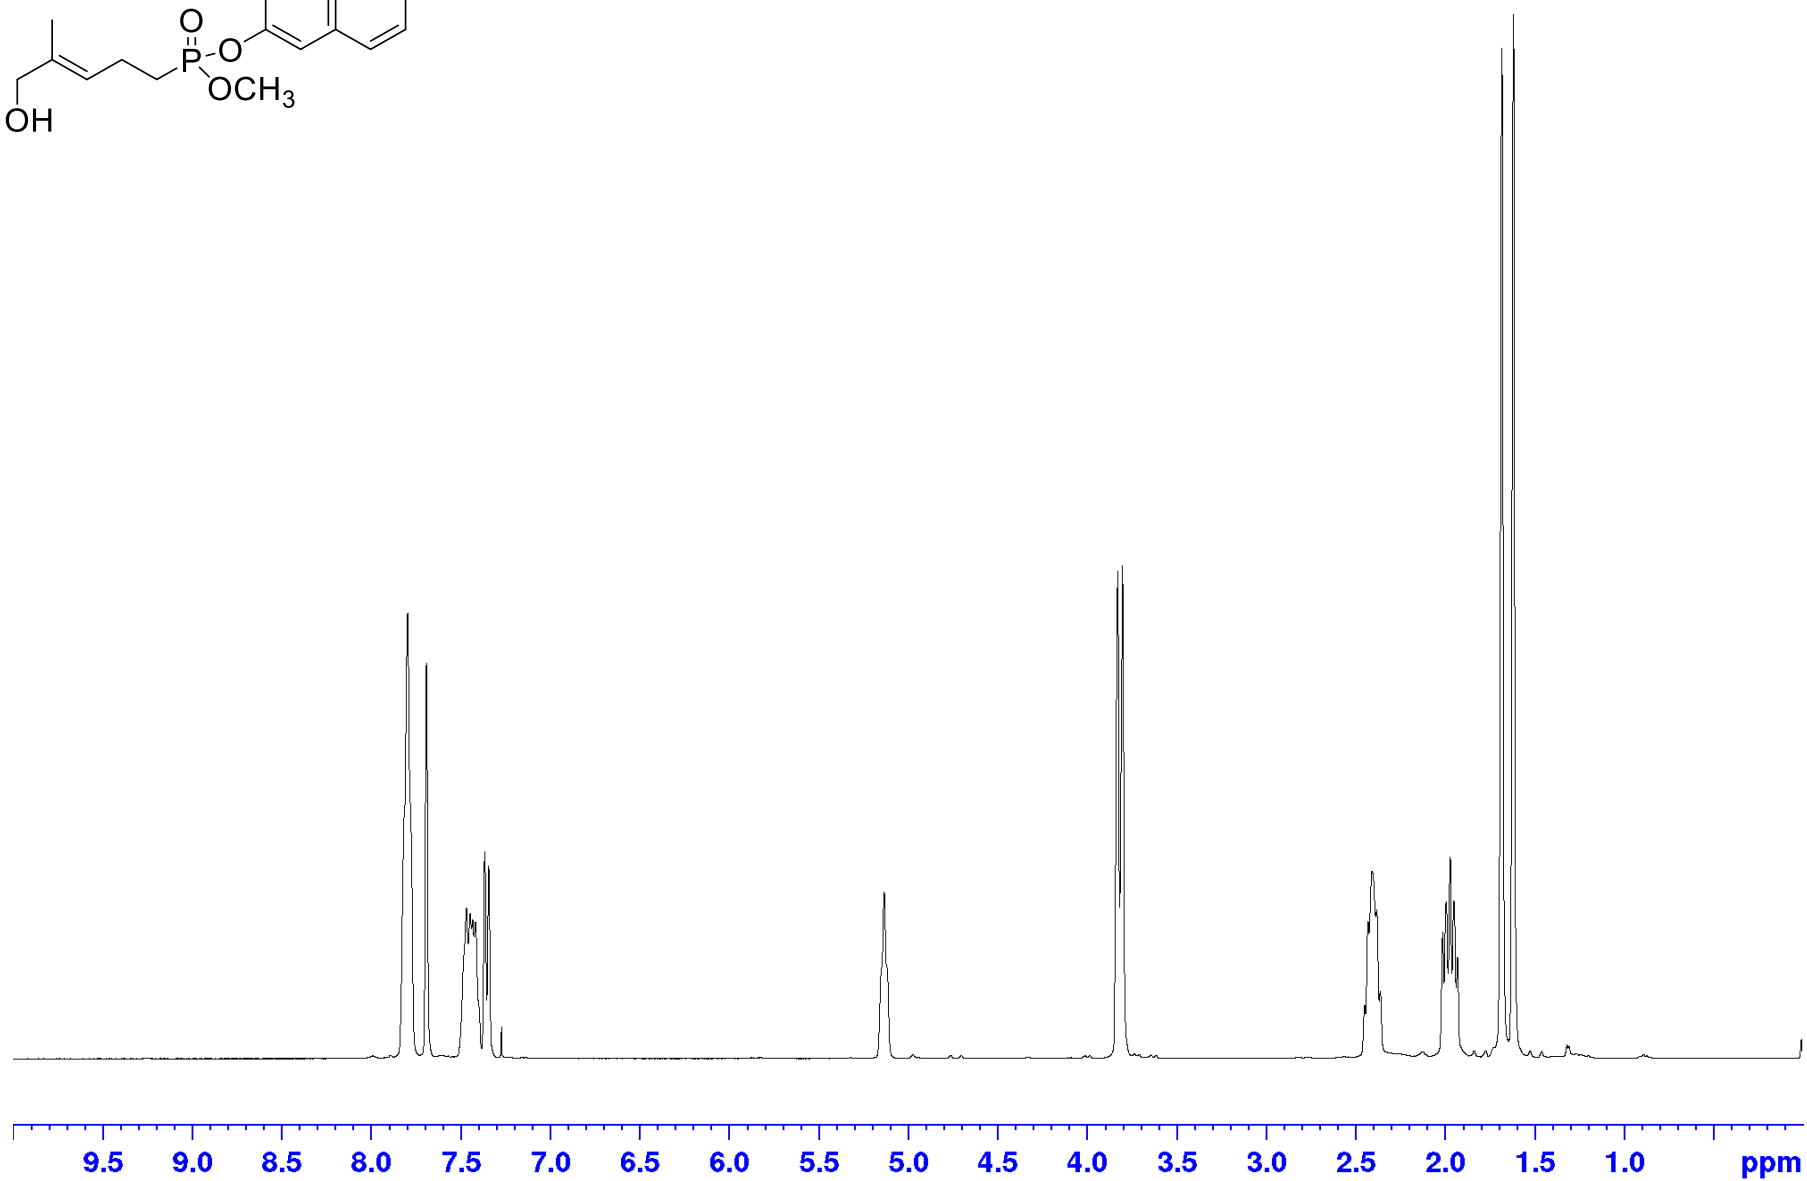

300 MHz <sup>1</sup>H NMR spectrum of compound 6c.

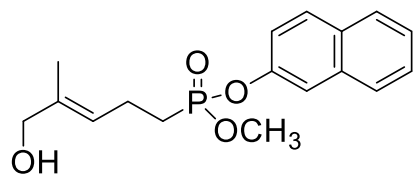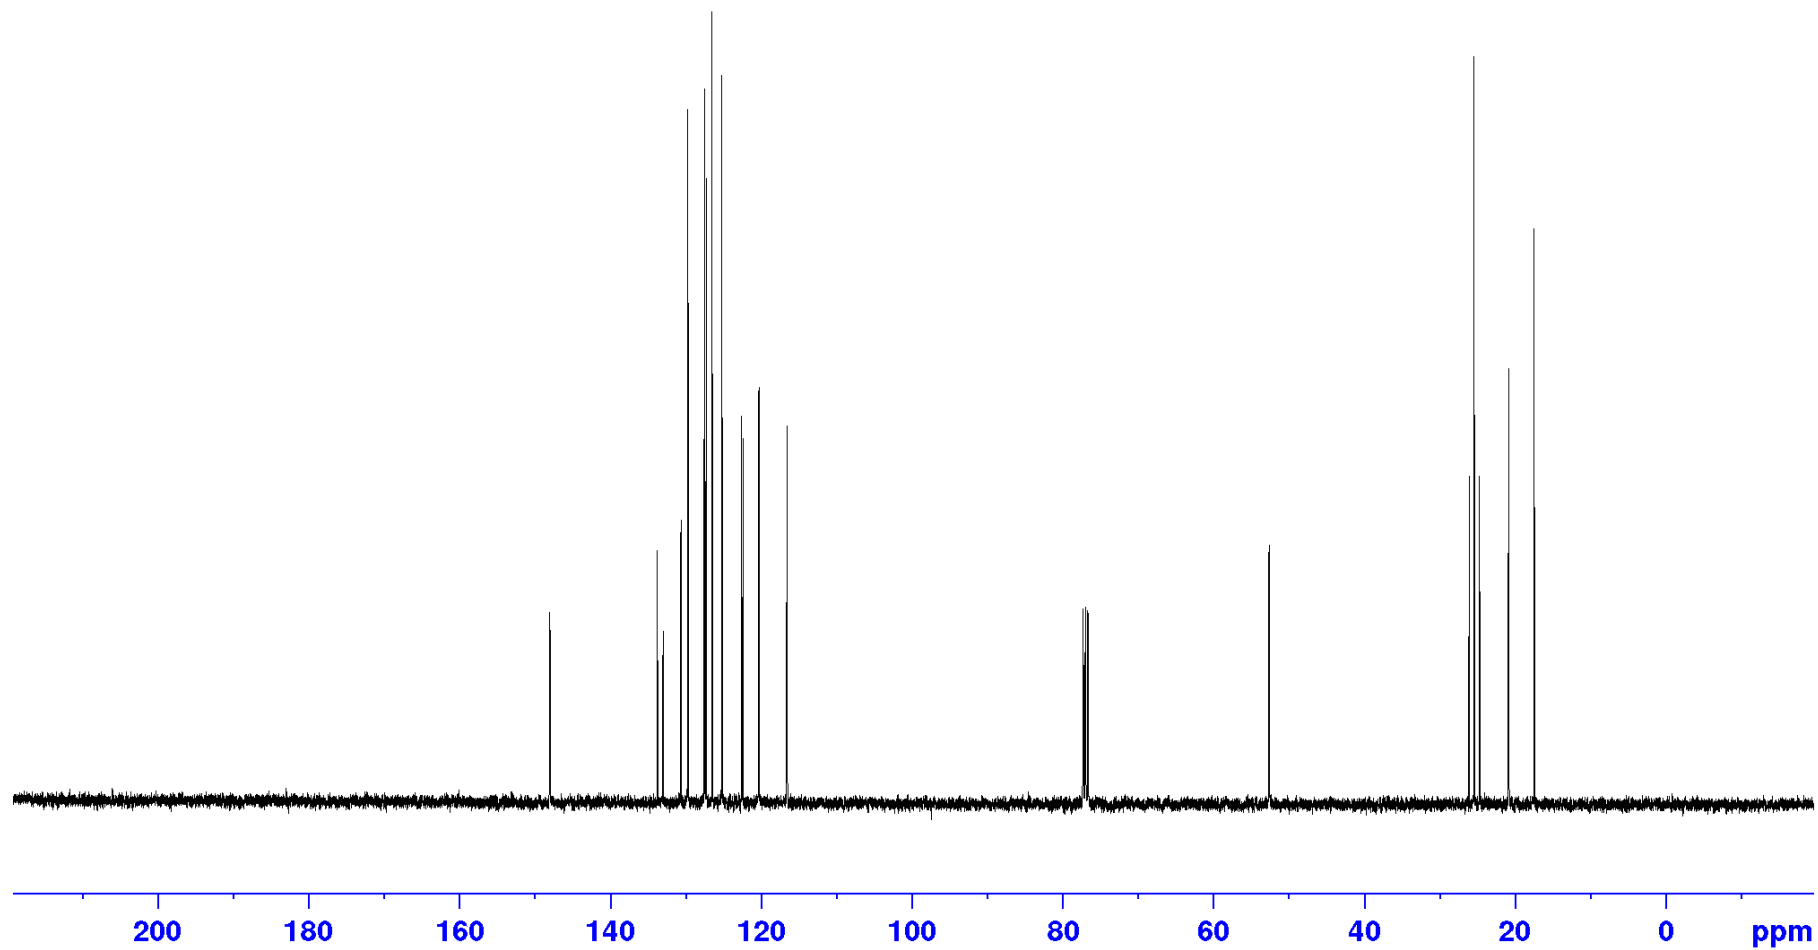

75 MHz <sup>13</sup>C NMR spectrum of compound 6c.

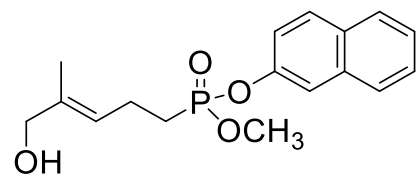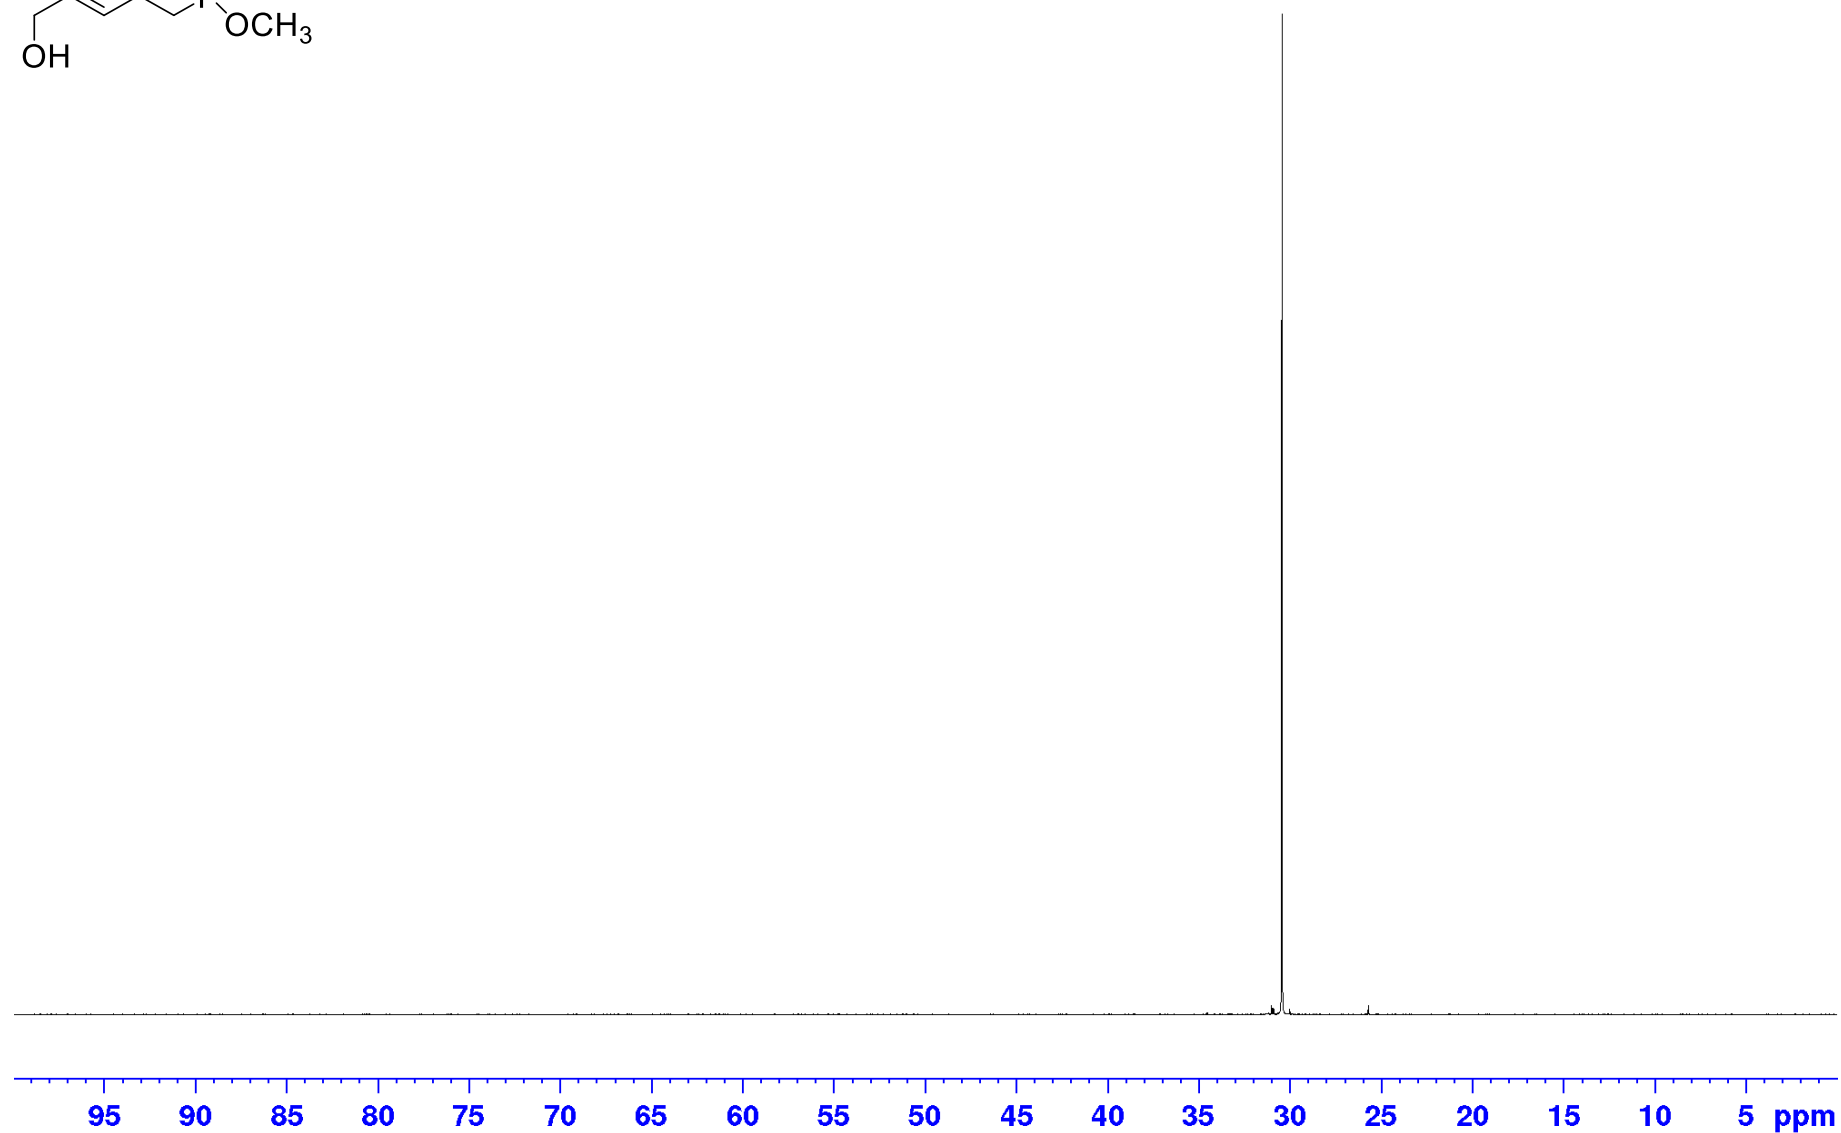

121 MHz  $^{31}\text{P}$  NMR spectrum of compound **6c**.

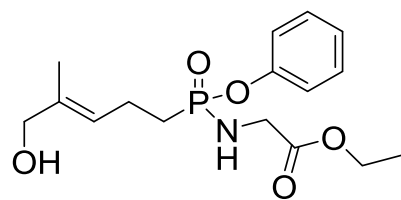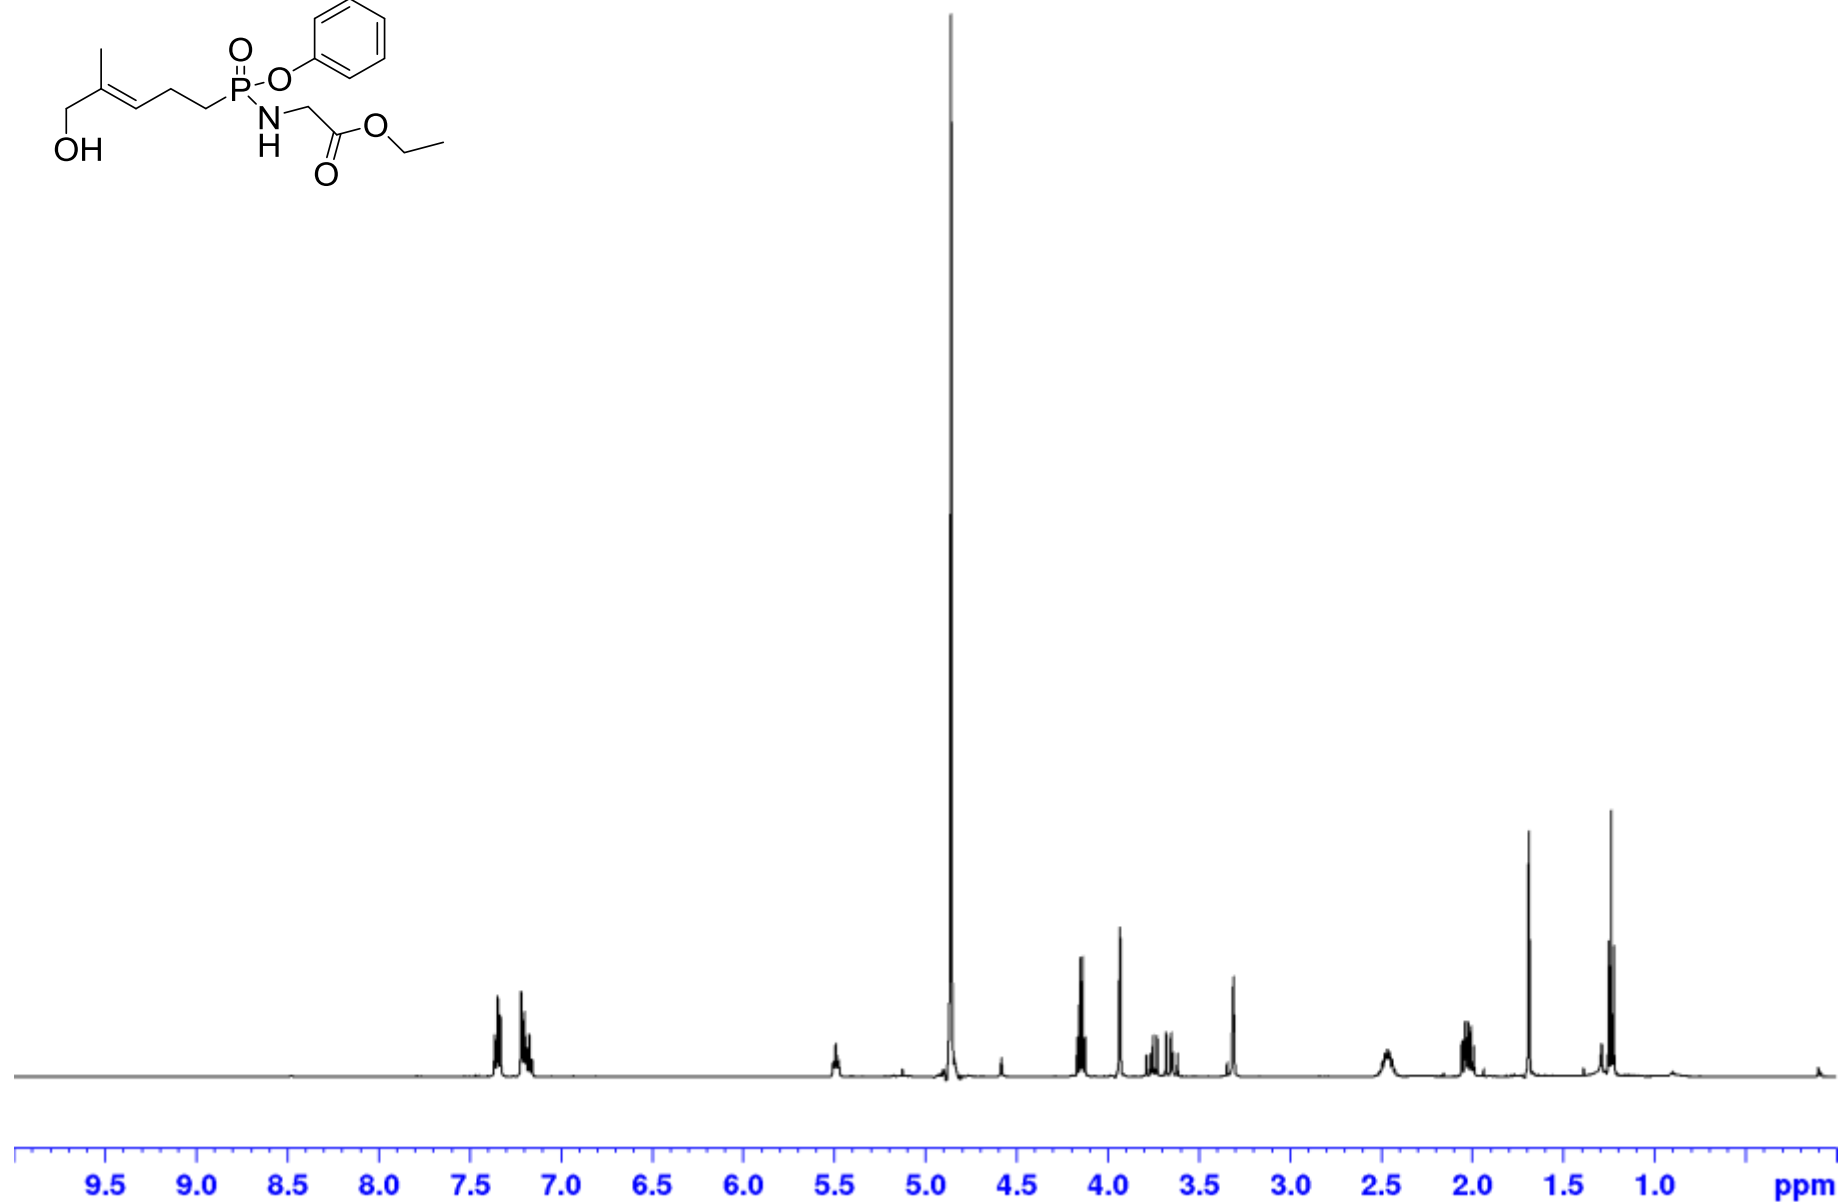

500 MHz  $^1\text{H}$  NMR spectrum of compound **9b**.

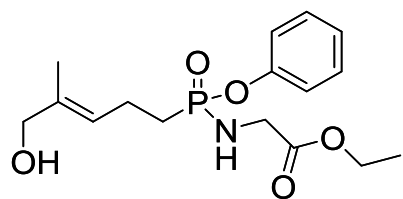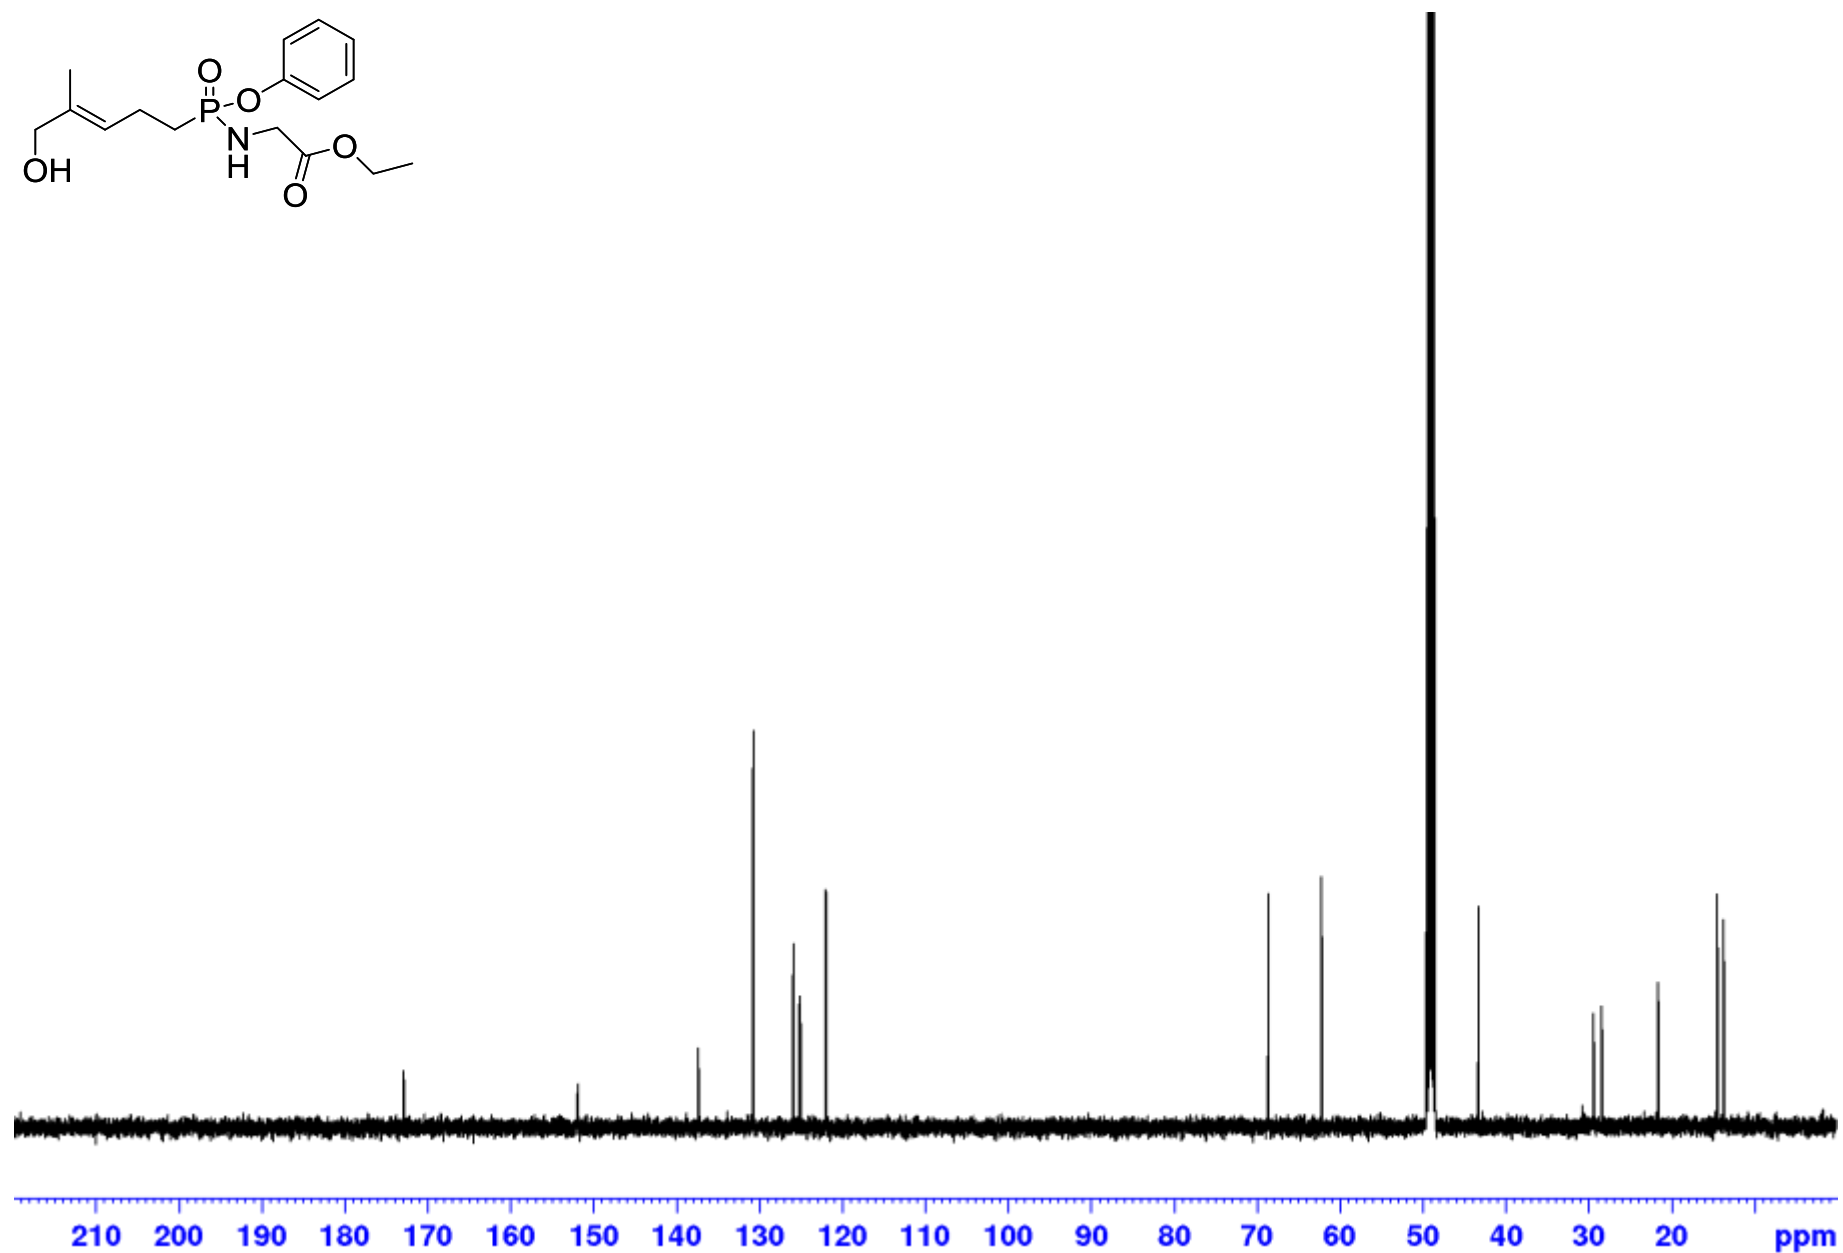

125 MHz  $^{13}\text{C}$  NMR spectrum of compound **9b**.

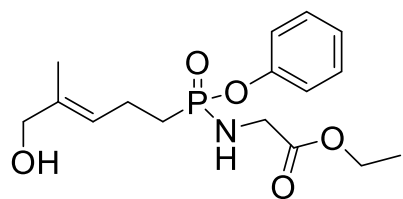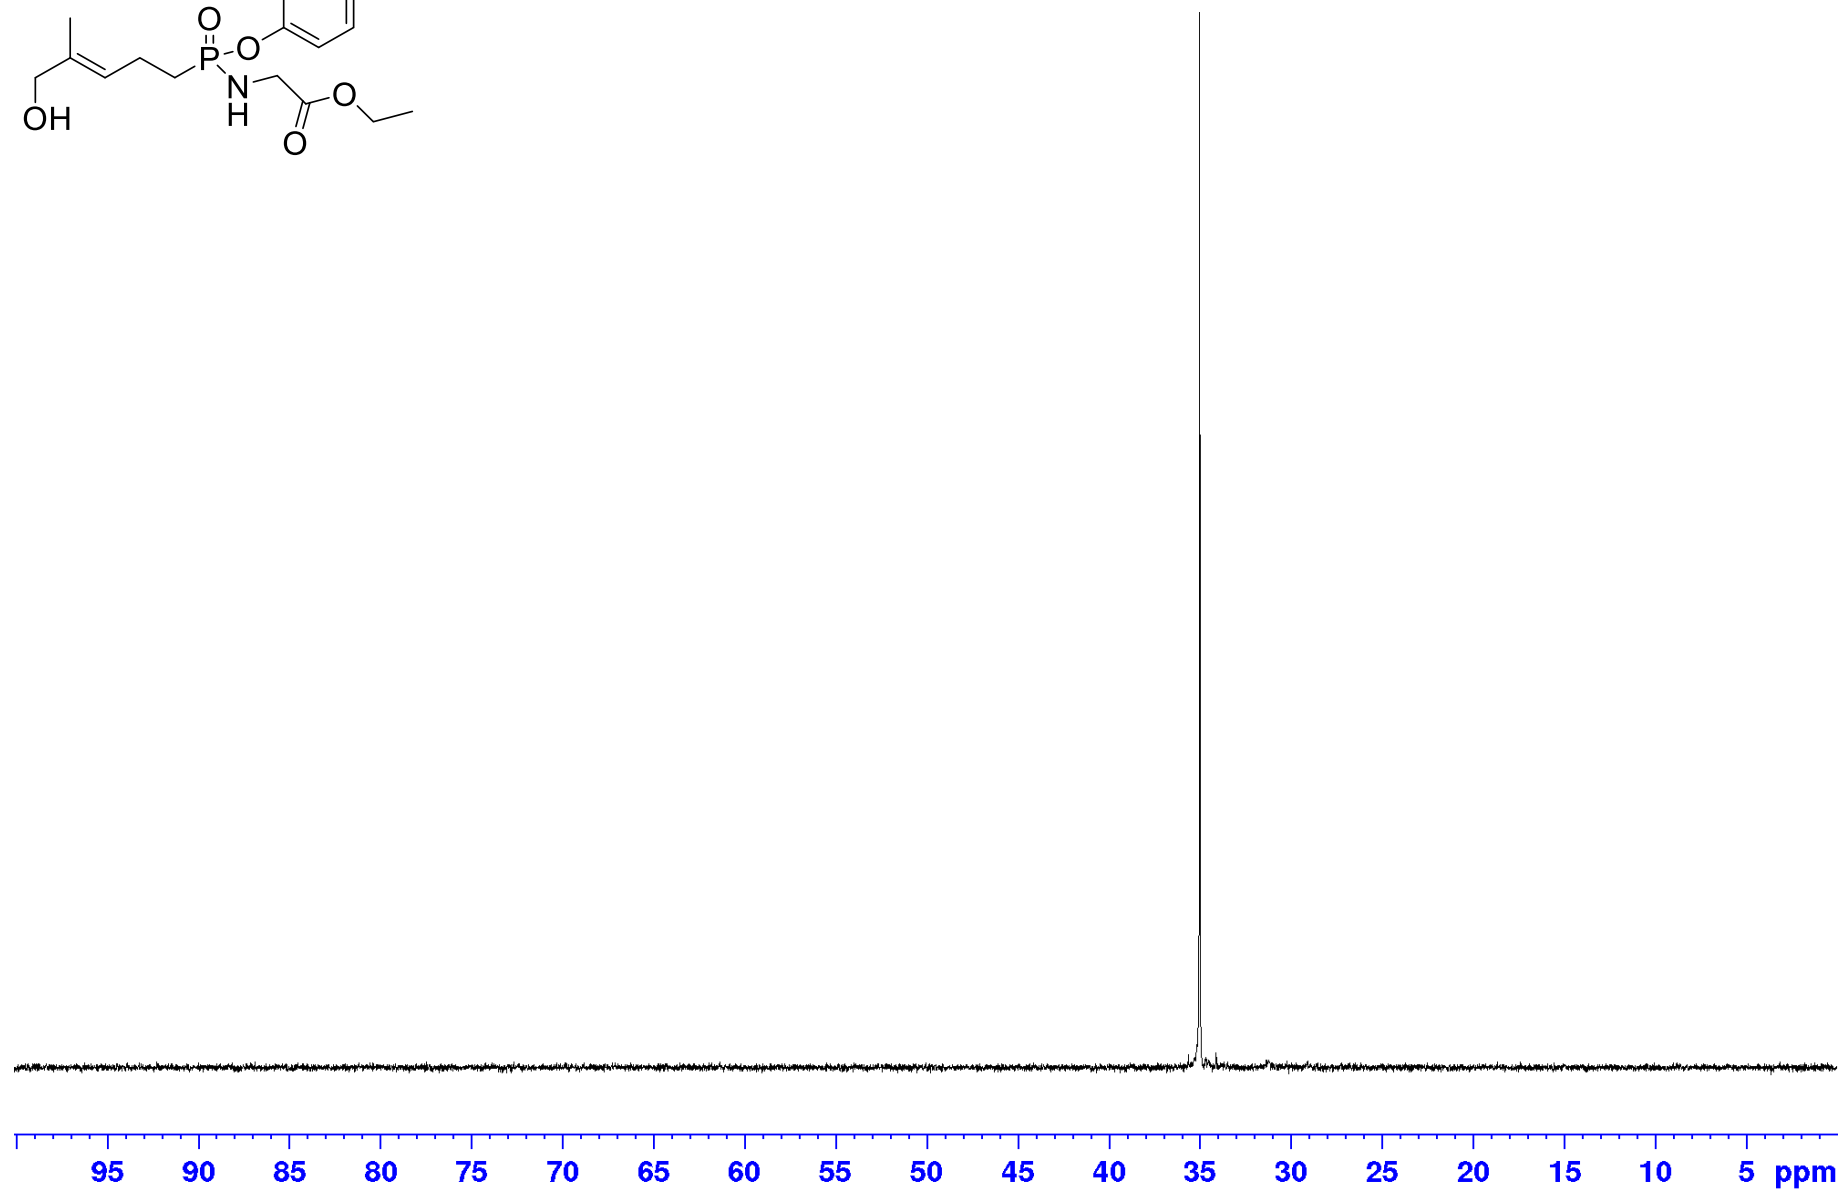

202 MHz  $^{31}\text{P}$  NMR spectrum of compound **9b**.



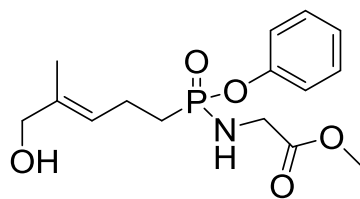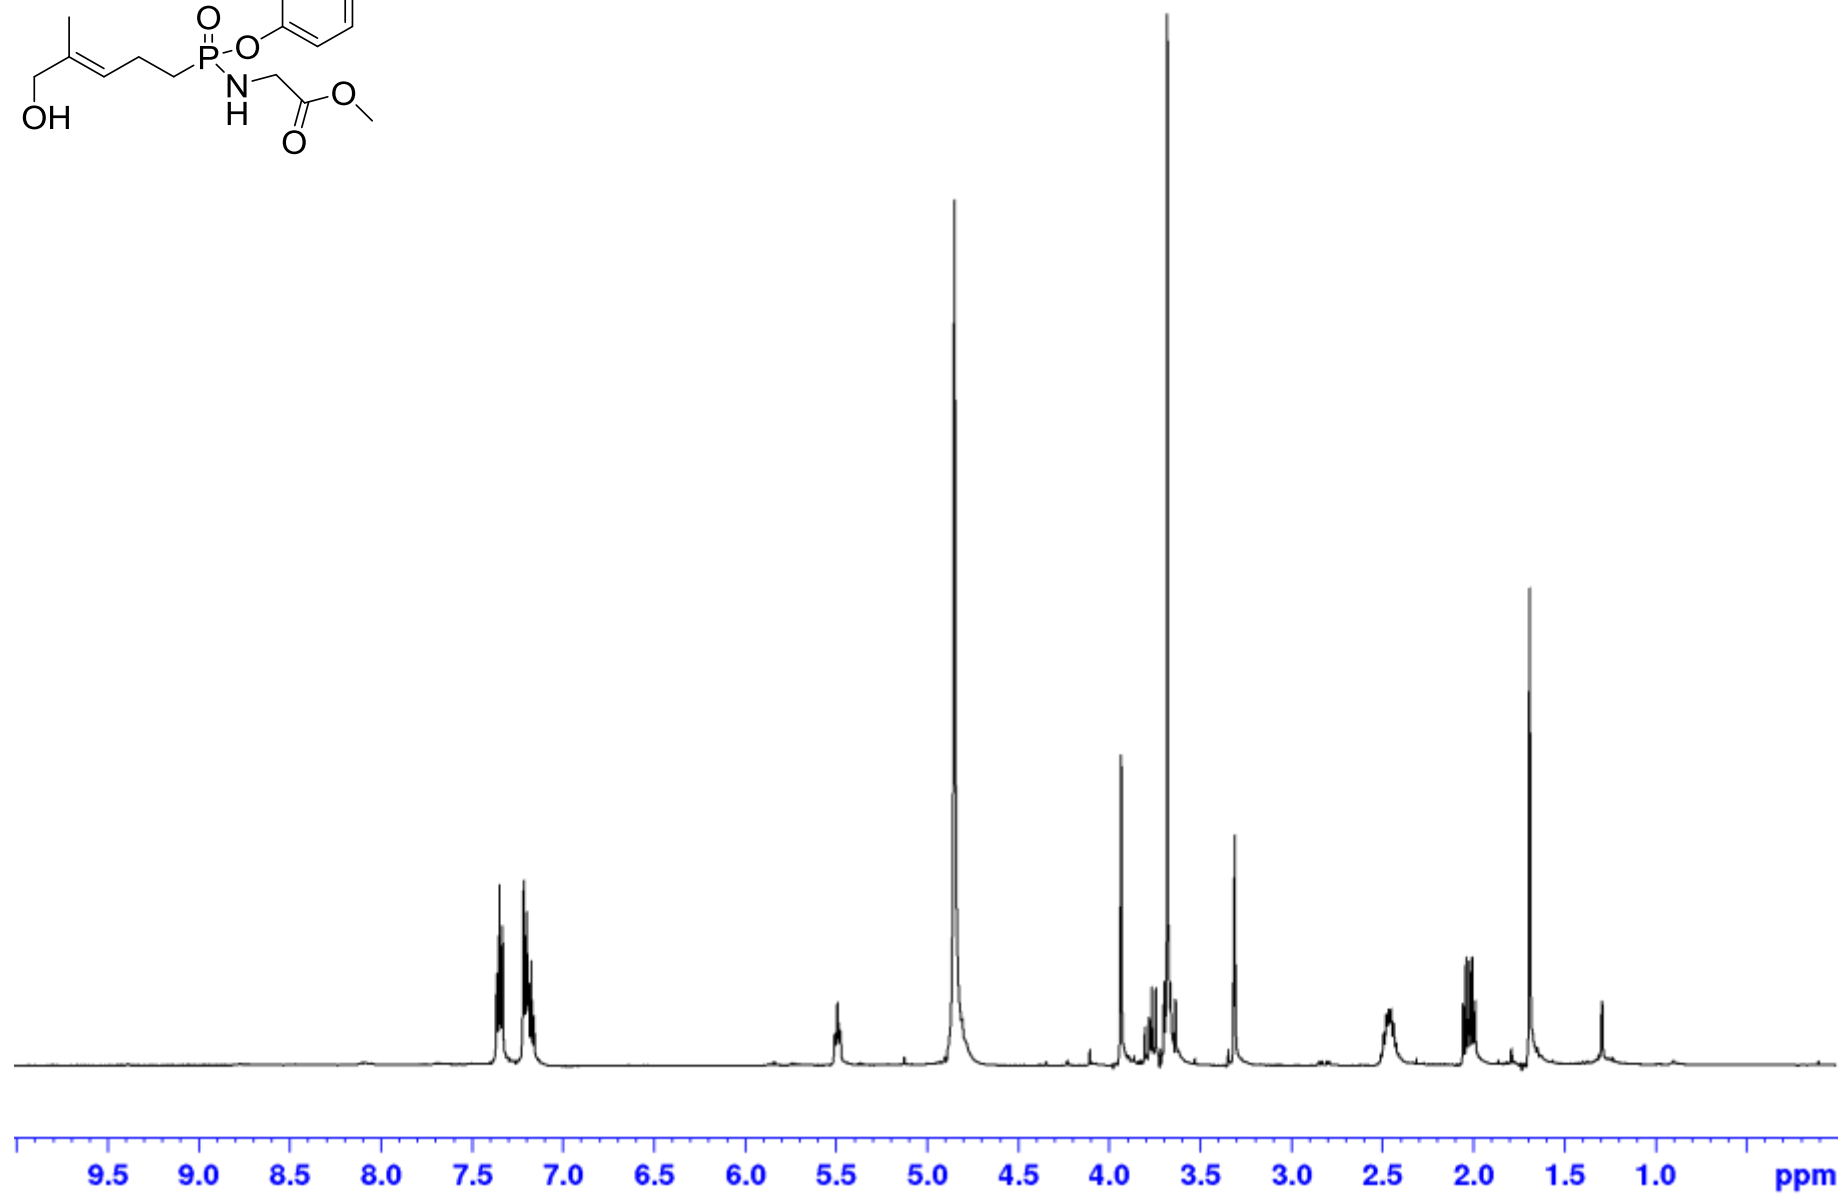

500 MHz  $^1\text{H}$  NMR spectrum of compound 9a.

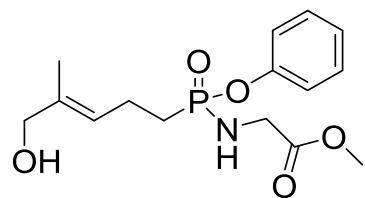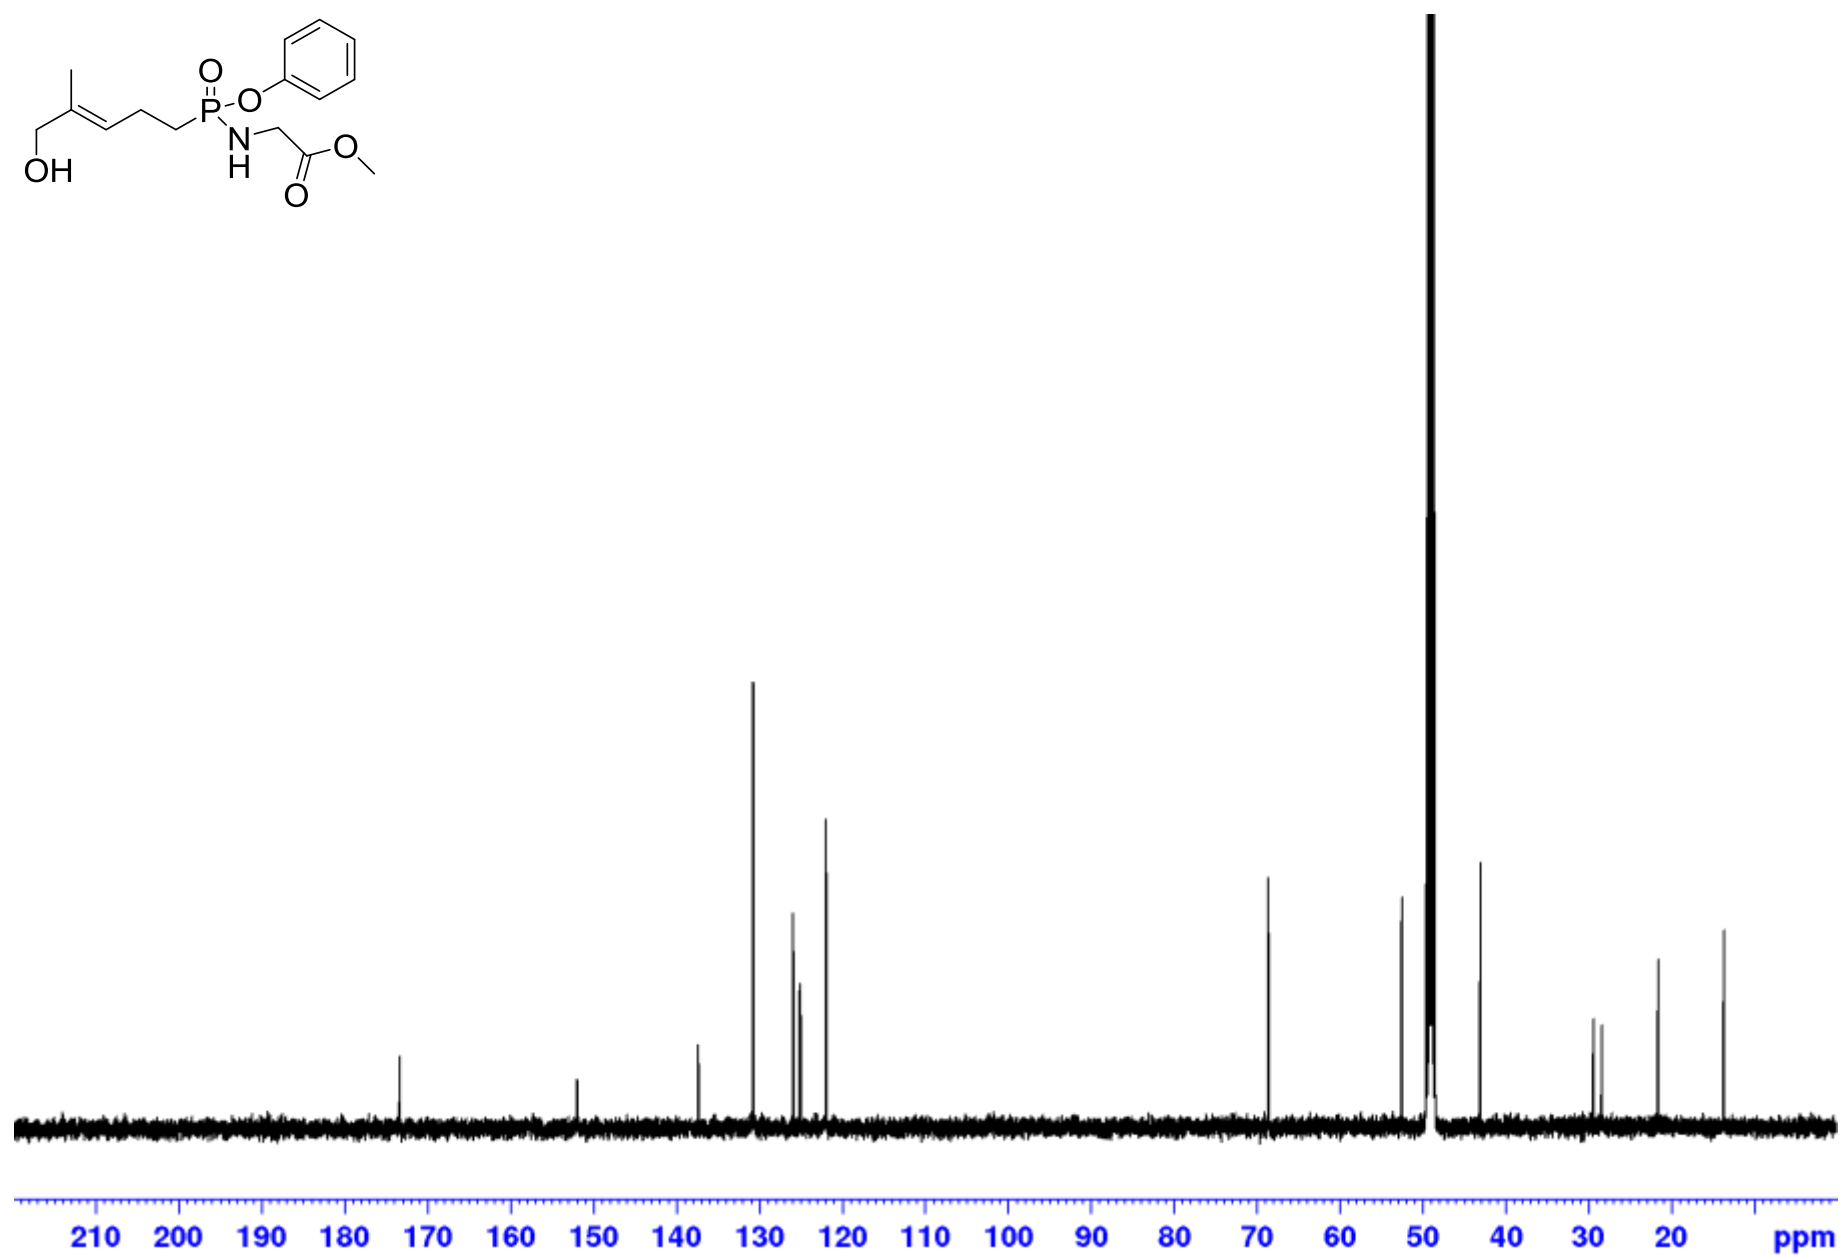

125 MHz <sup>13</sup>C NMR spectrum of compound 9a.

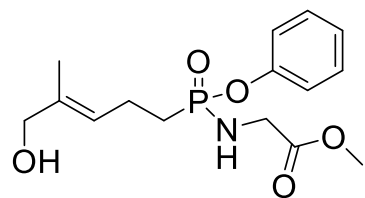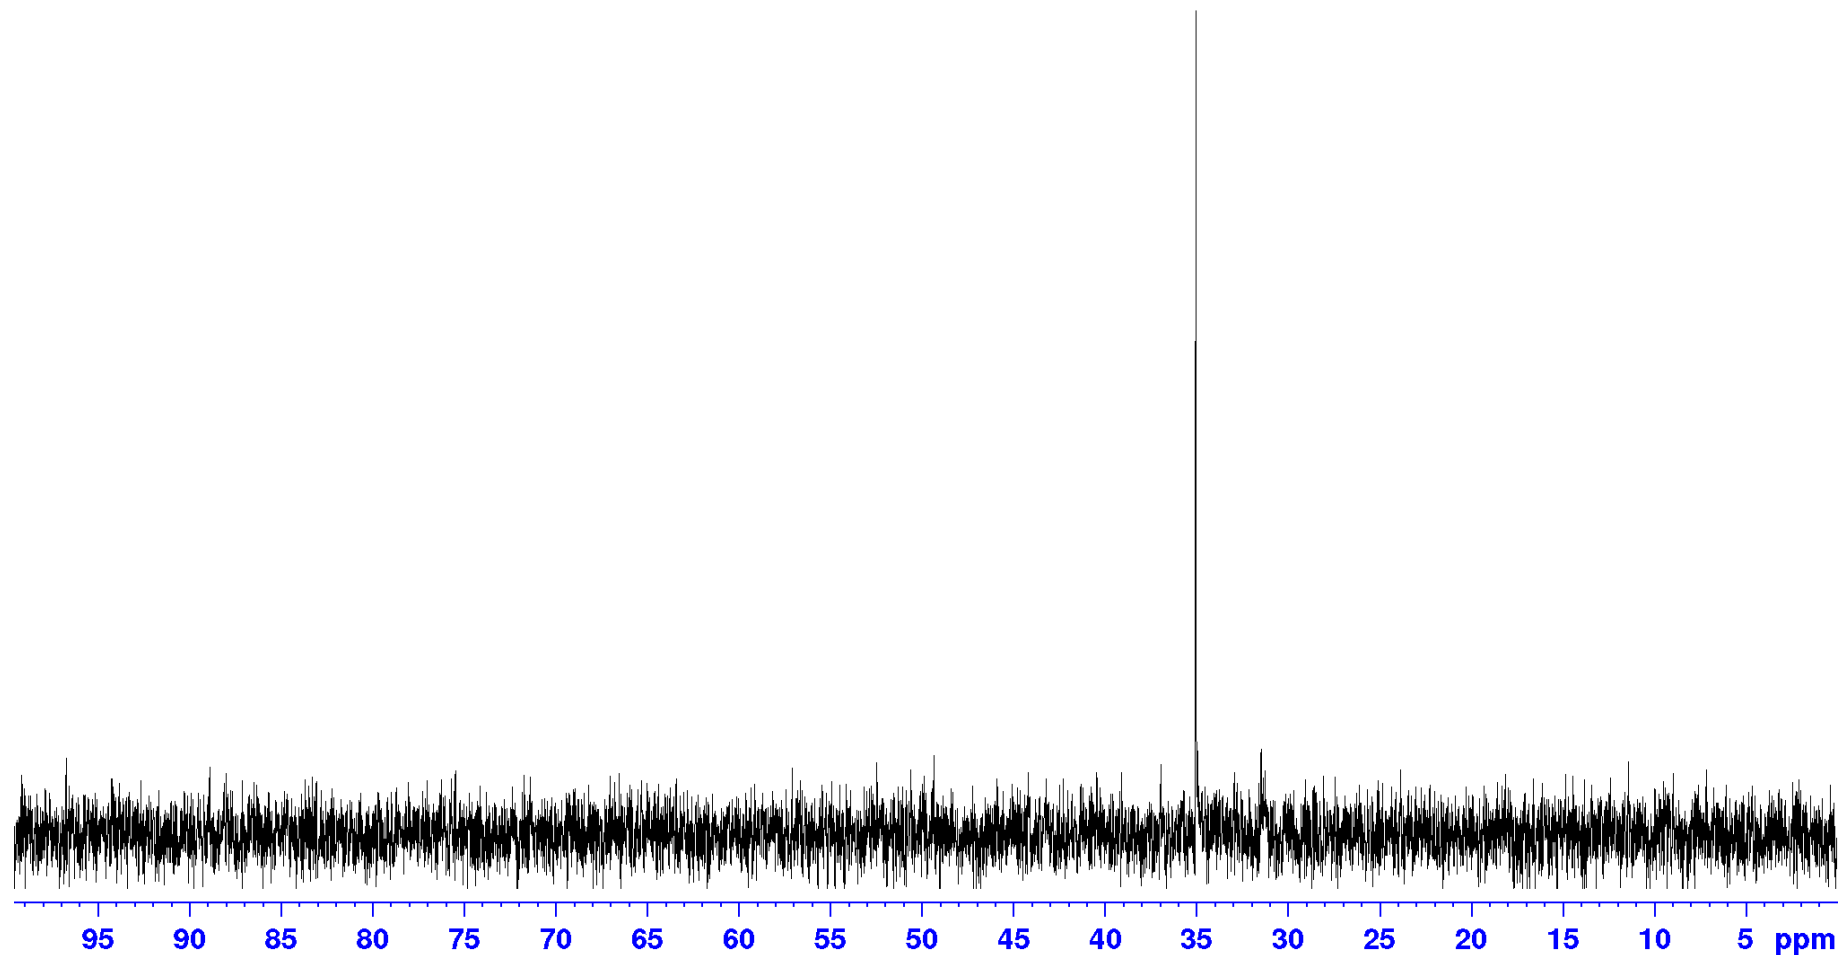

161 MHz  $^{31}\text{P}$  NMR spectrum of compound 9a.

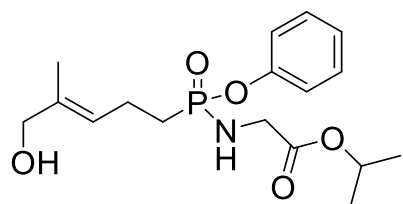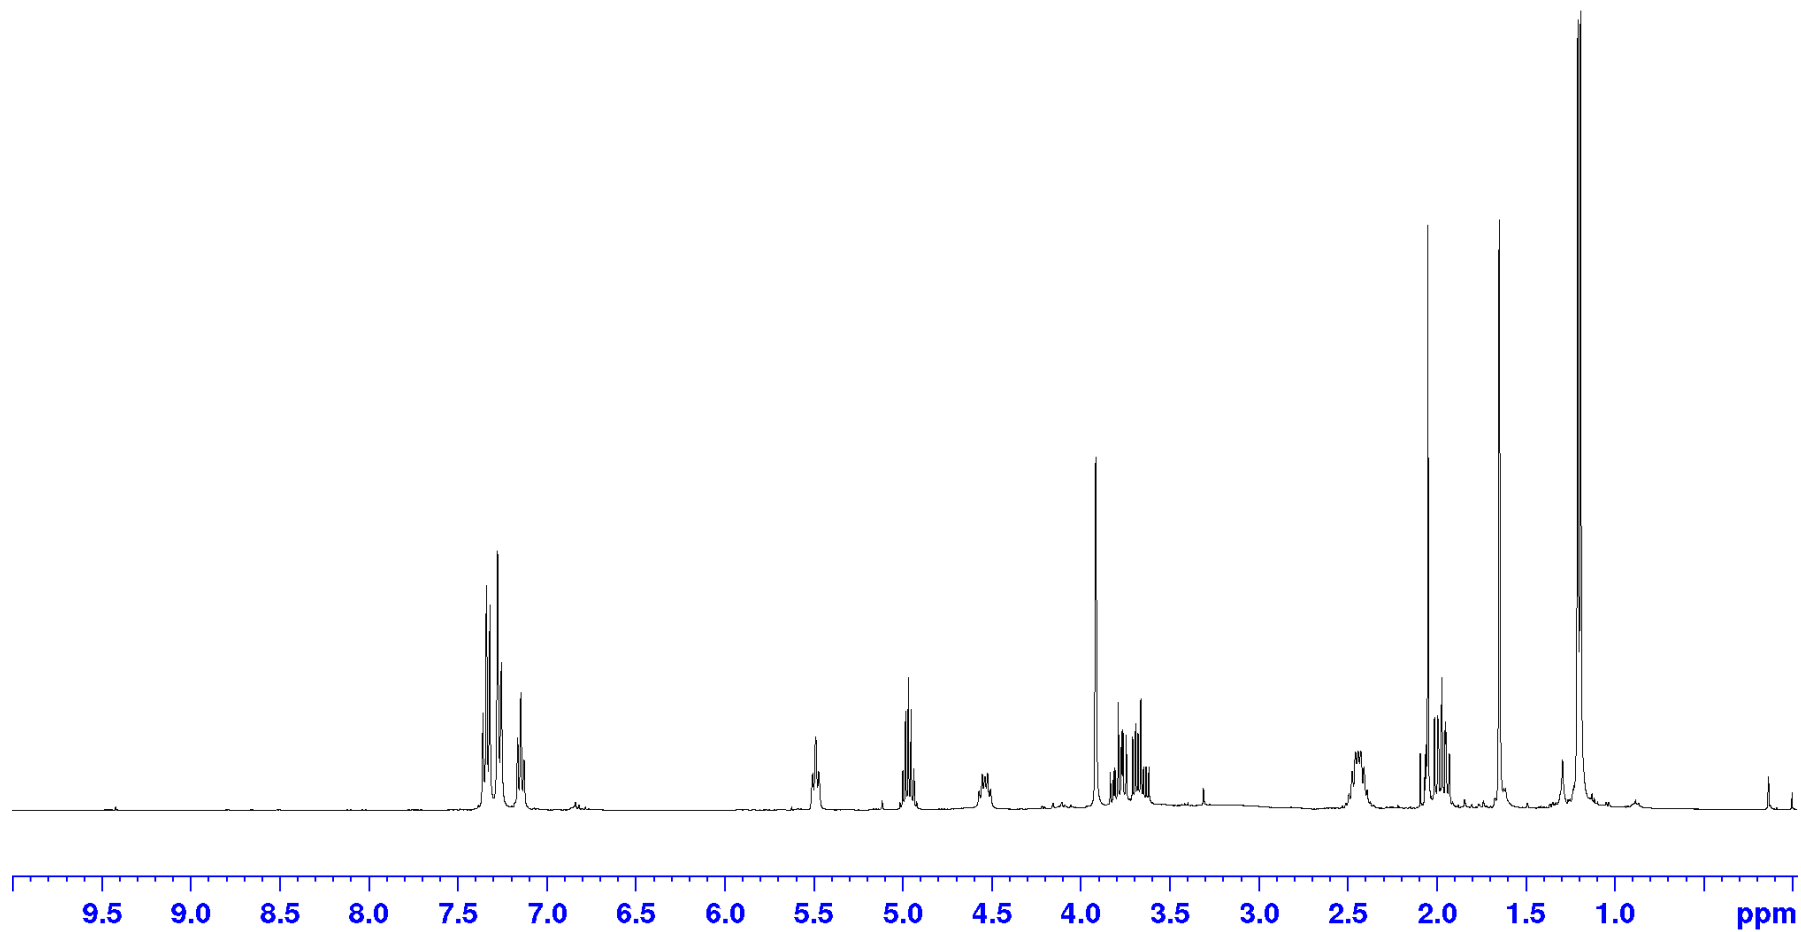

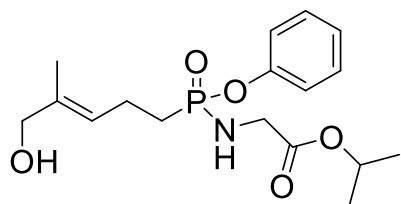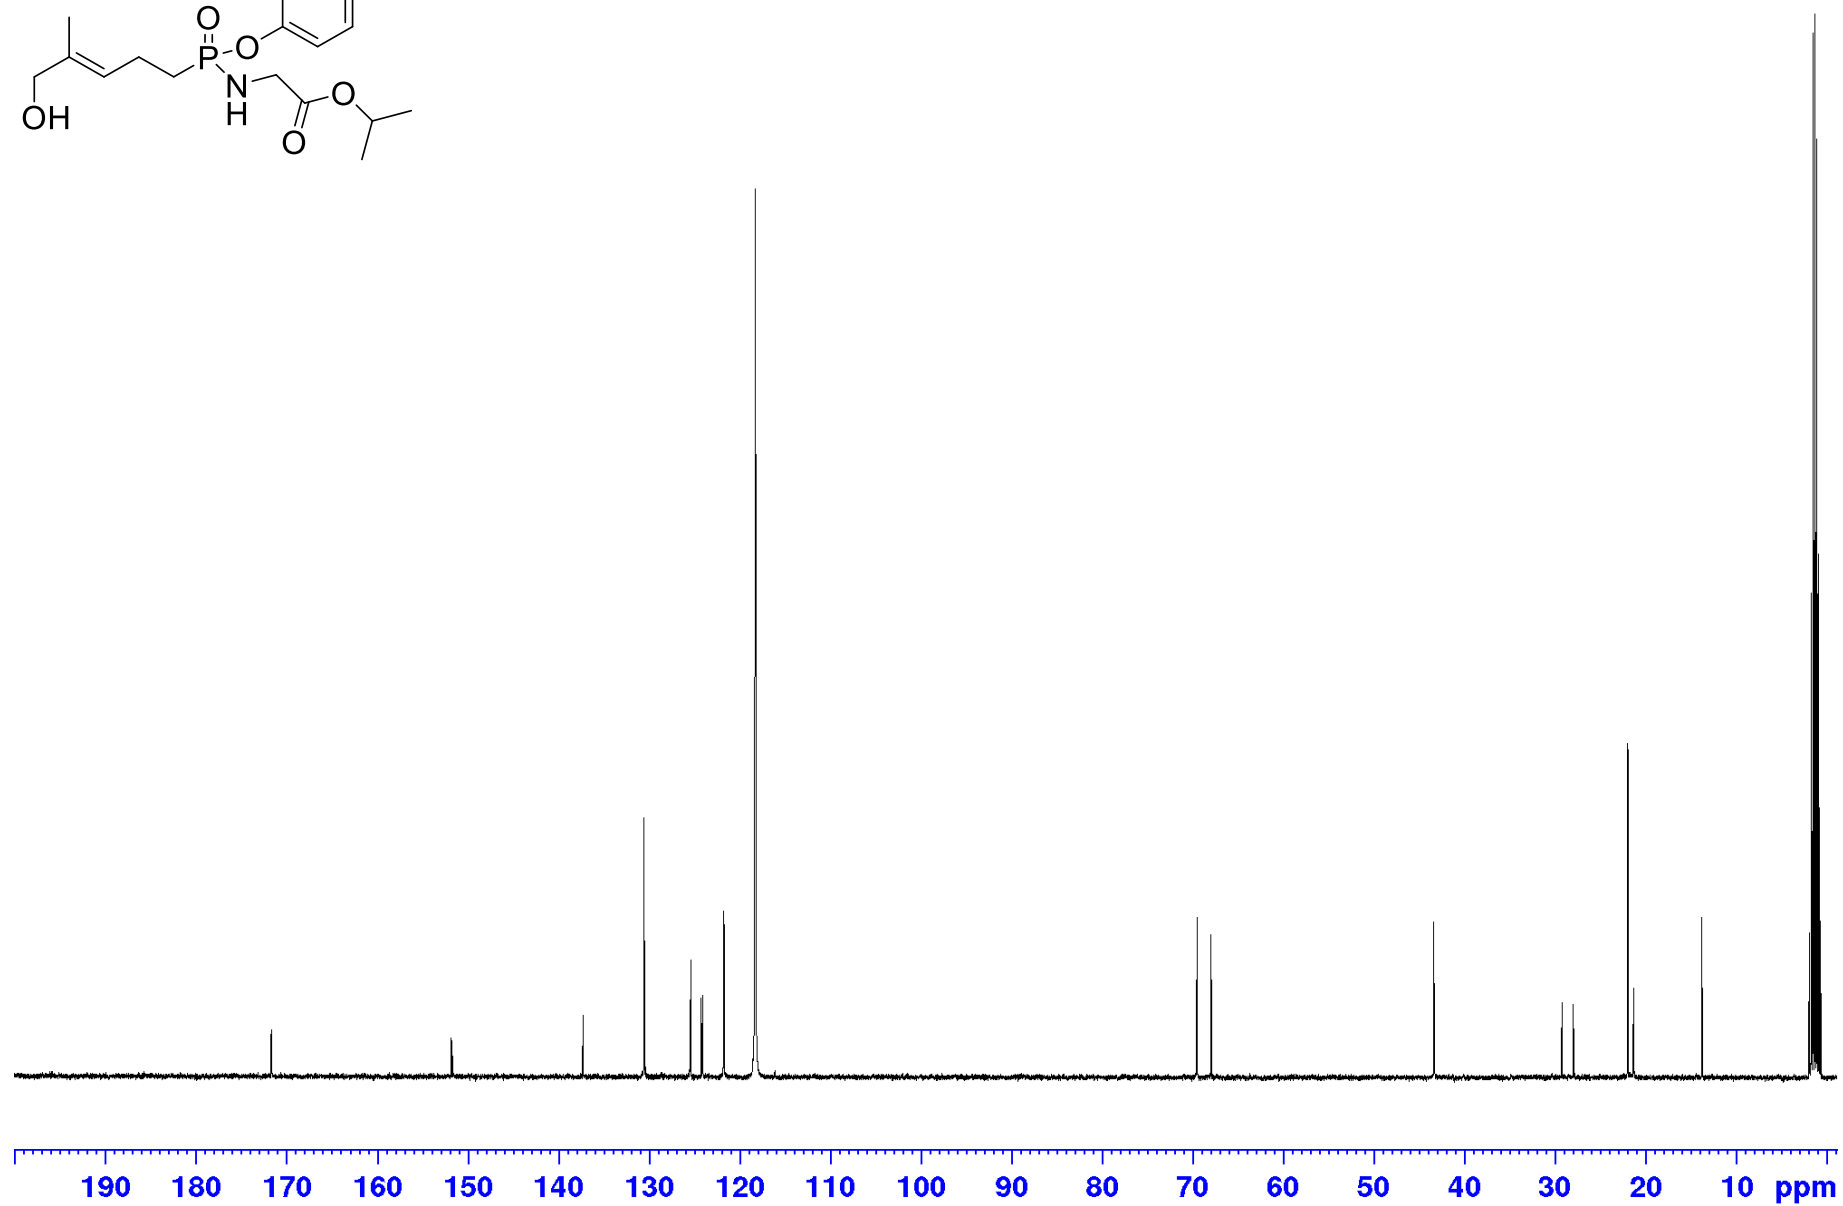

100 MHz  $^{13}\text{C}$  NMR spectrum of compound **9c**.

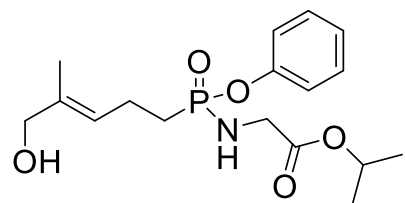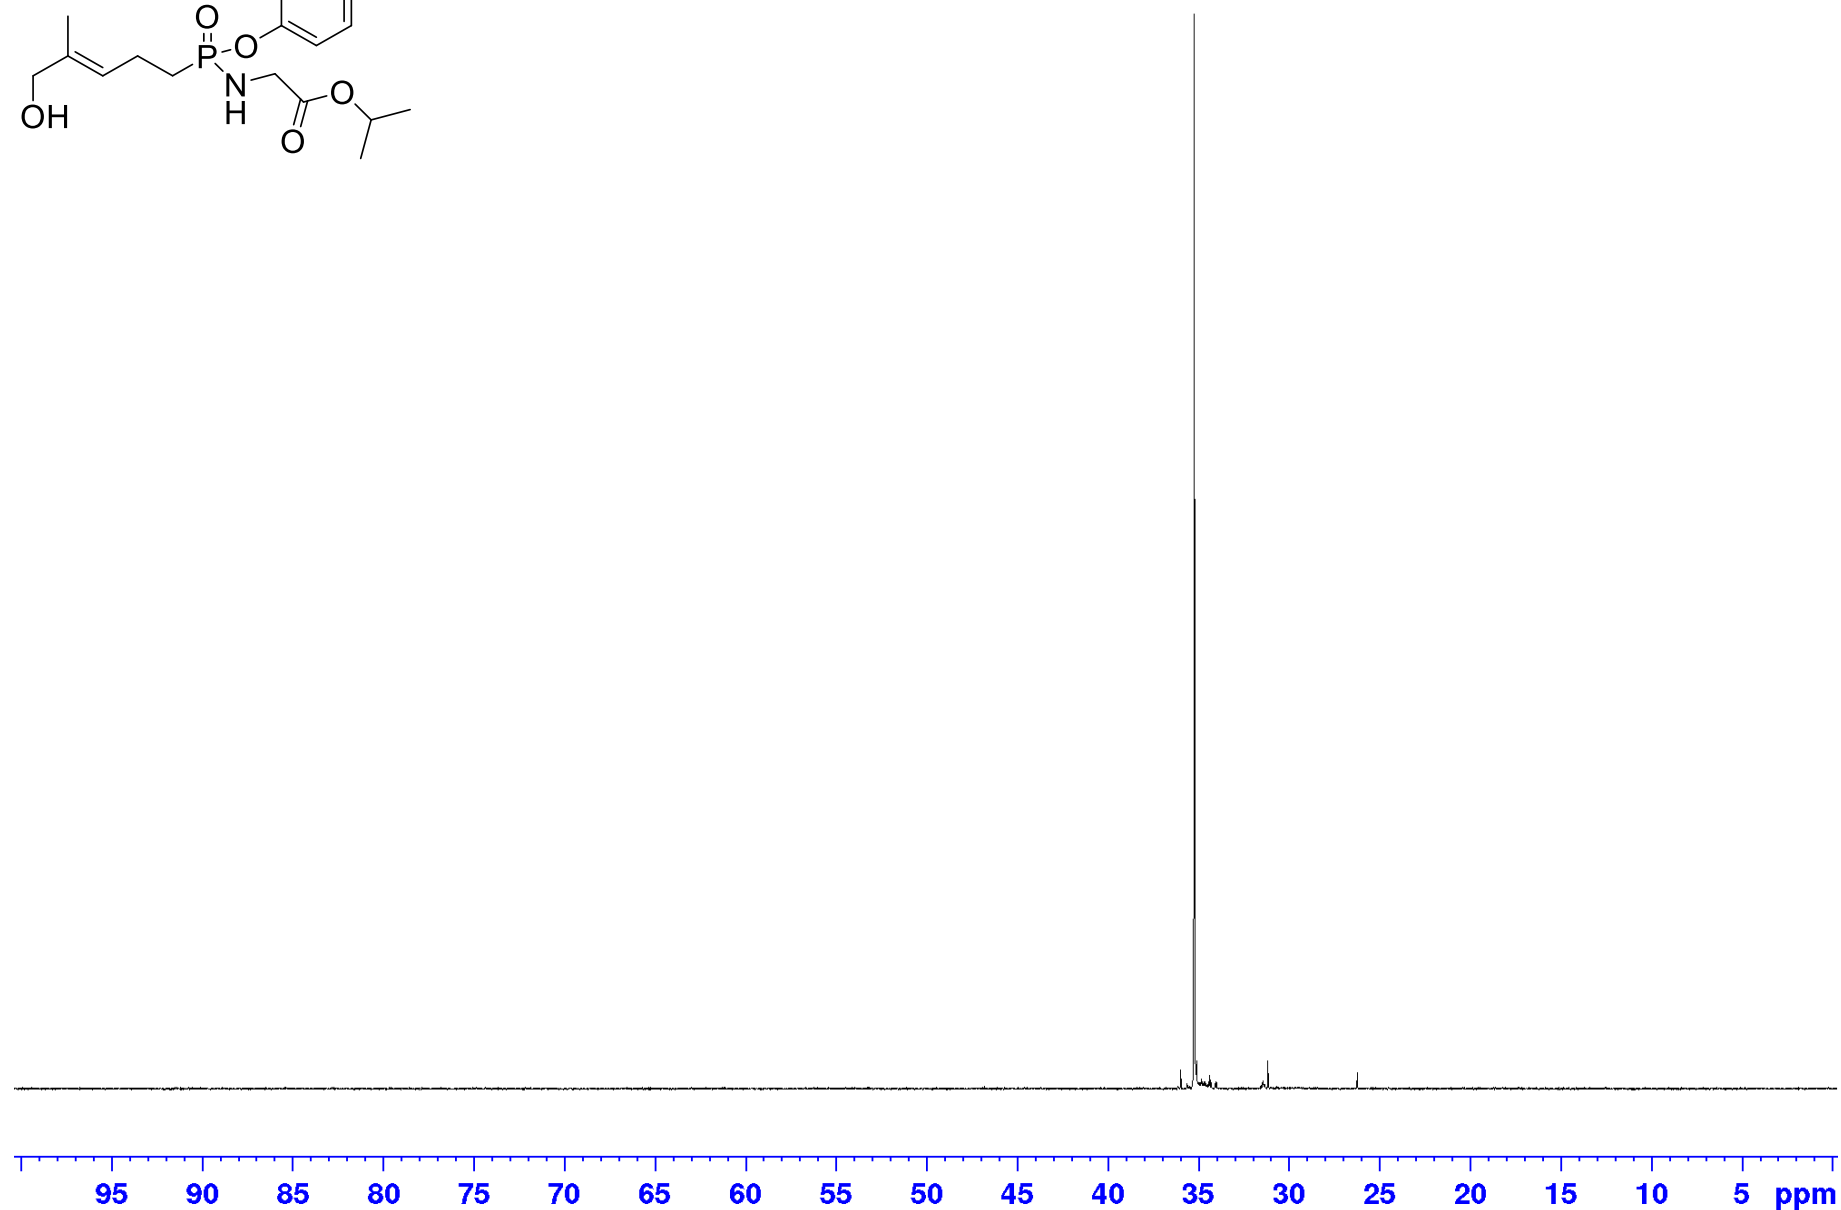

202 MHz  $^{31}\text{P}$  NMR spectrum of compound 9c.

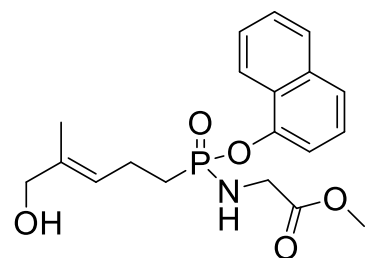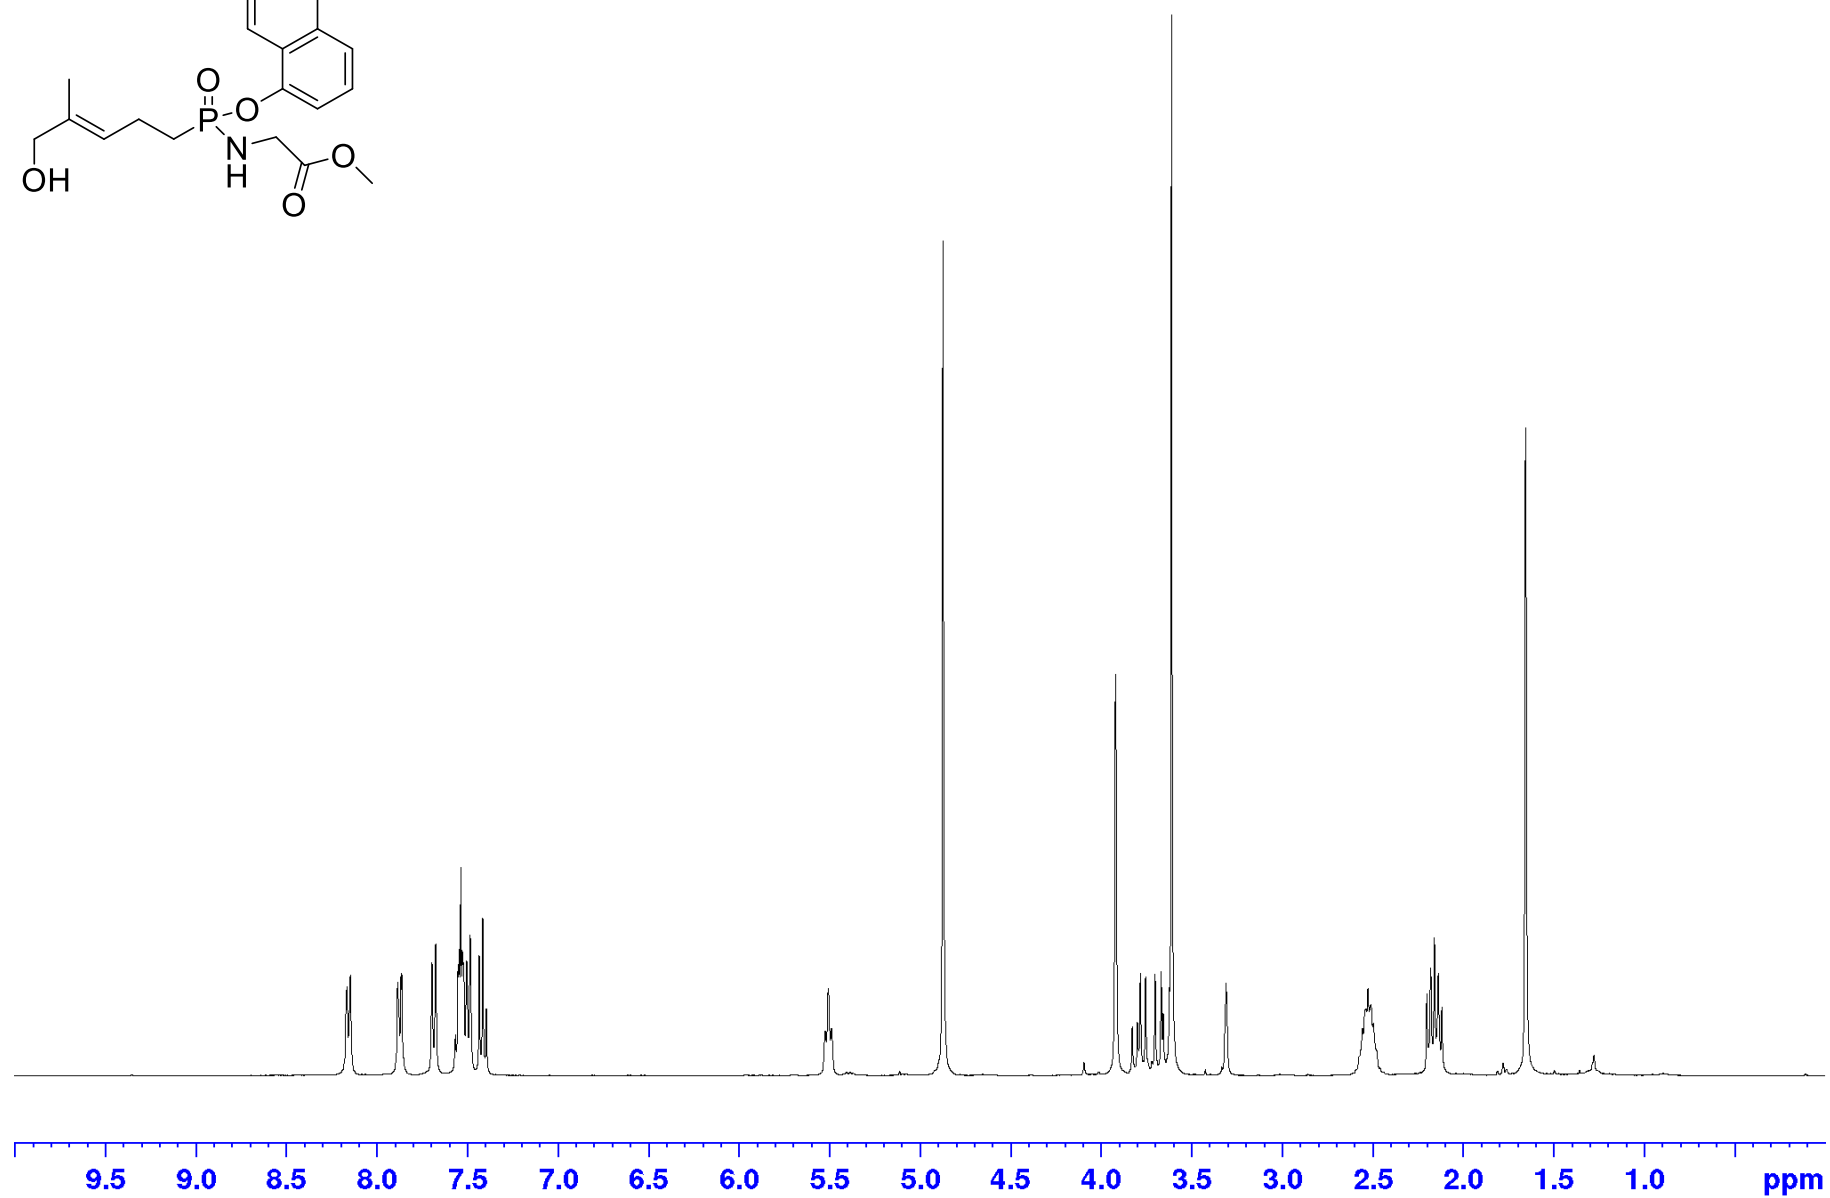

400 MHz  $^1\text{H}$  NMR spectrum of compound **9d**.  
S15

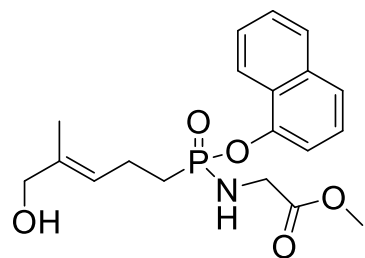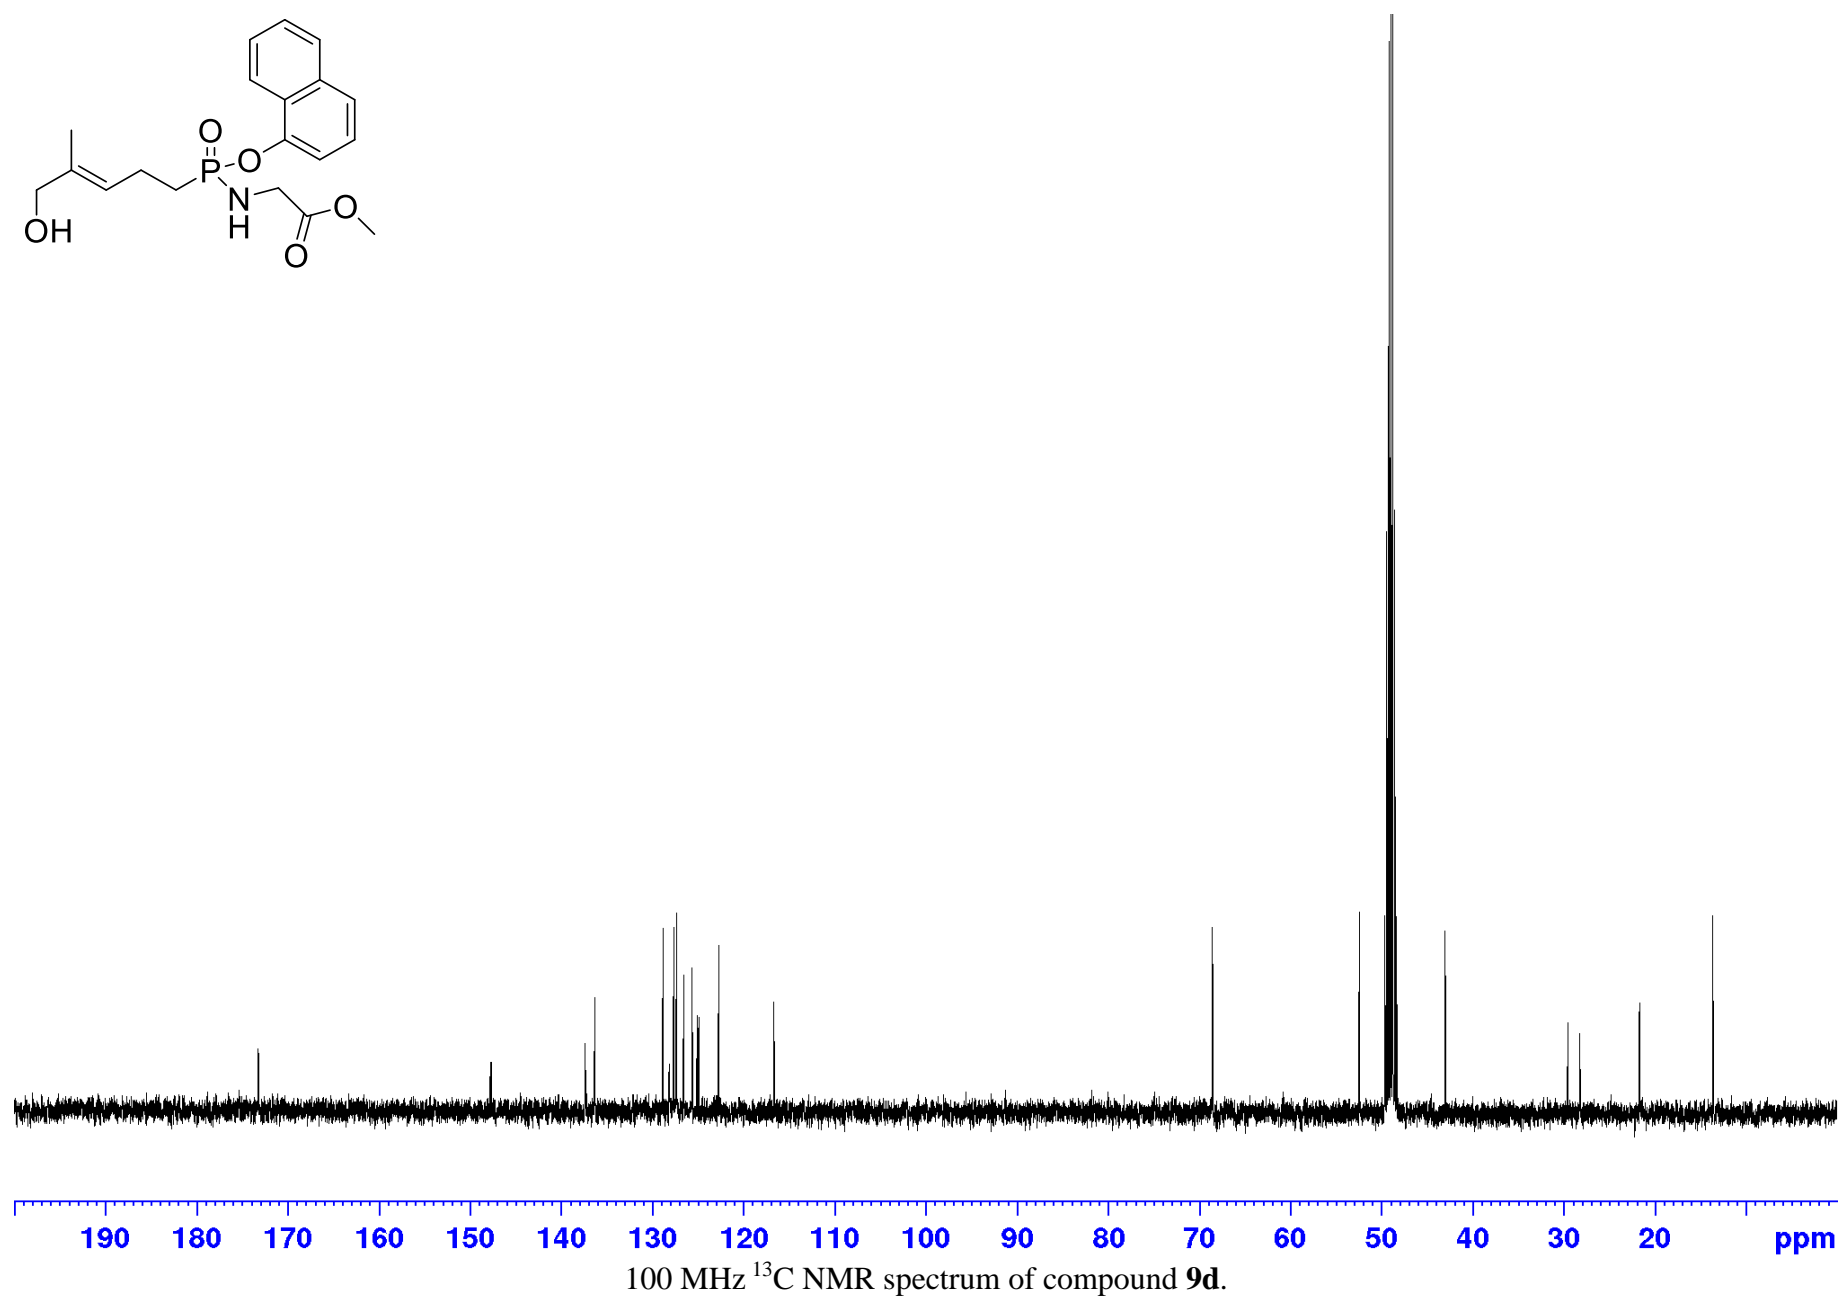



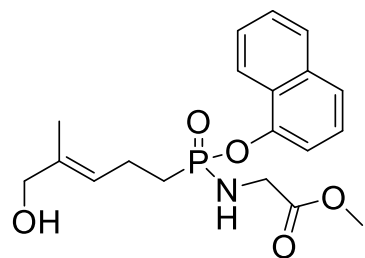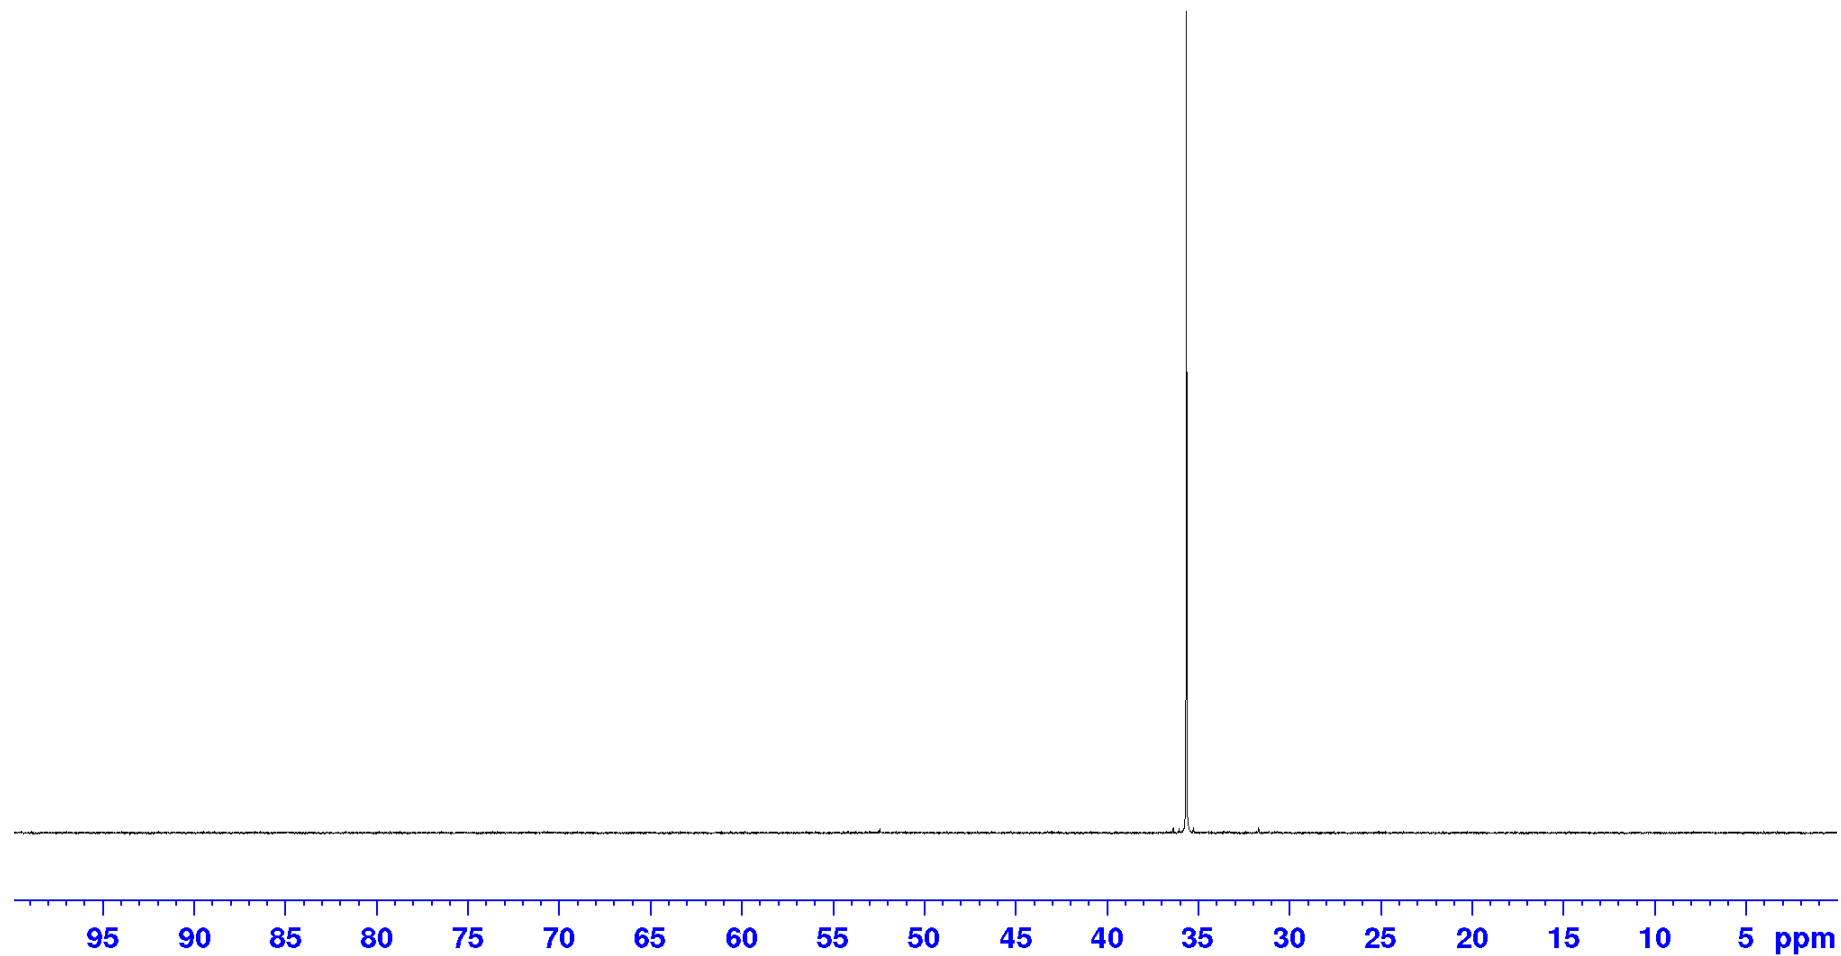

161 MHz <sup>31</sup>P NMR spectrum of compound 9d.

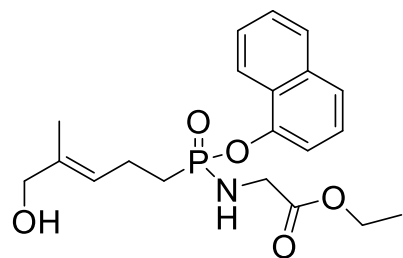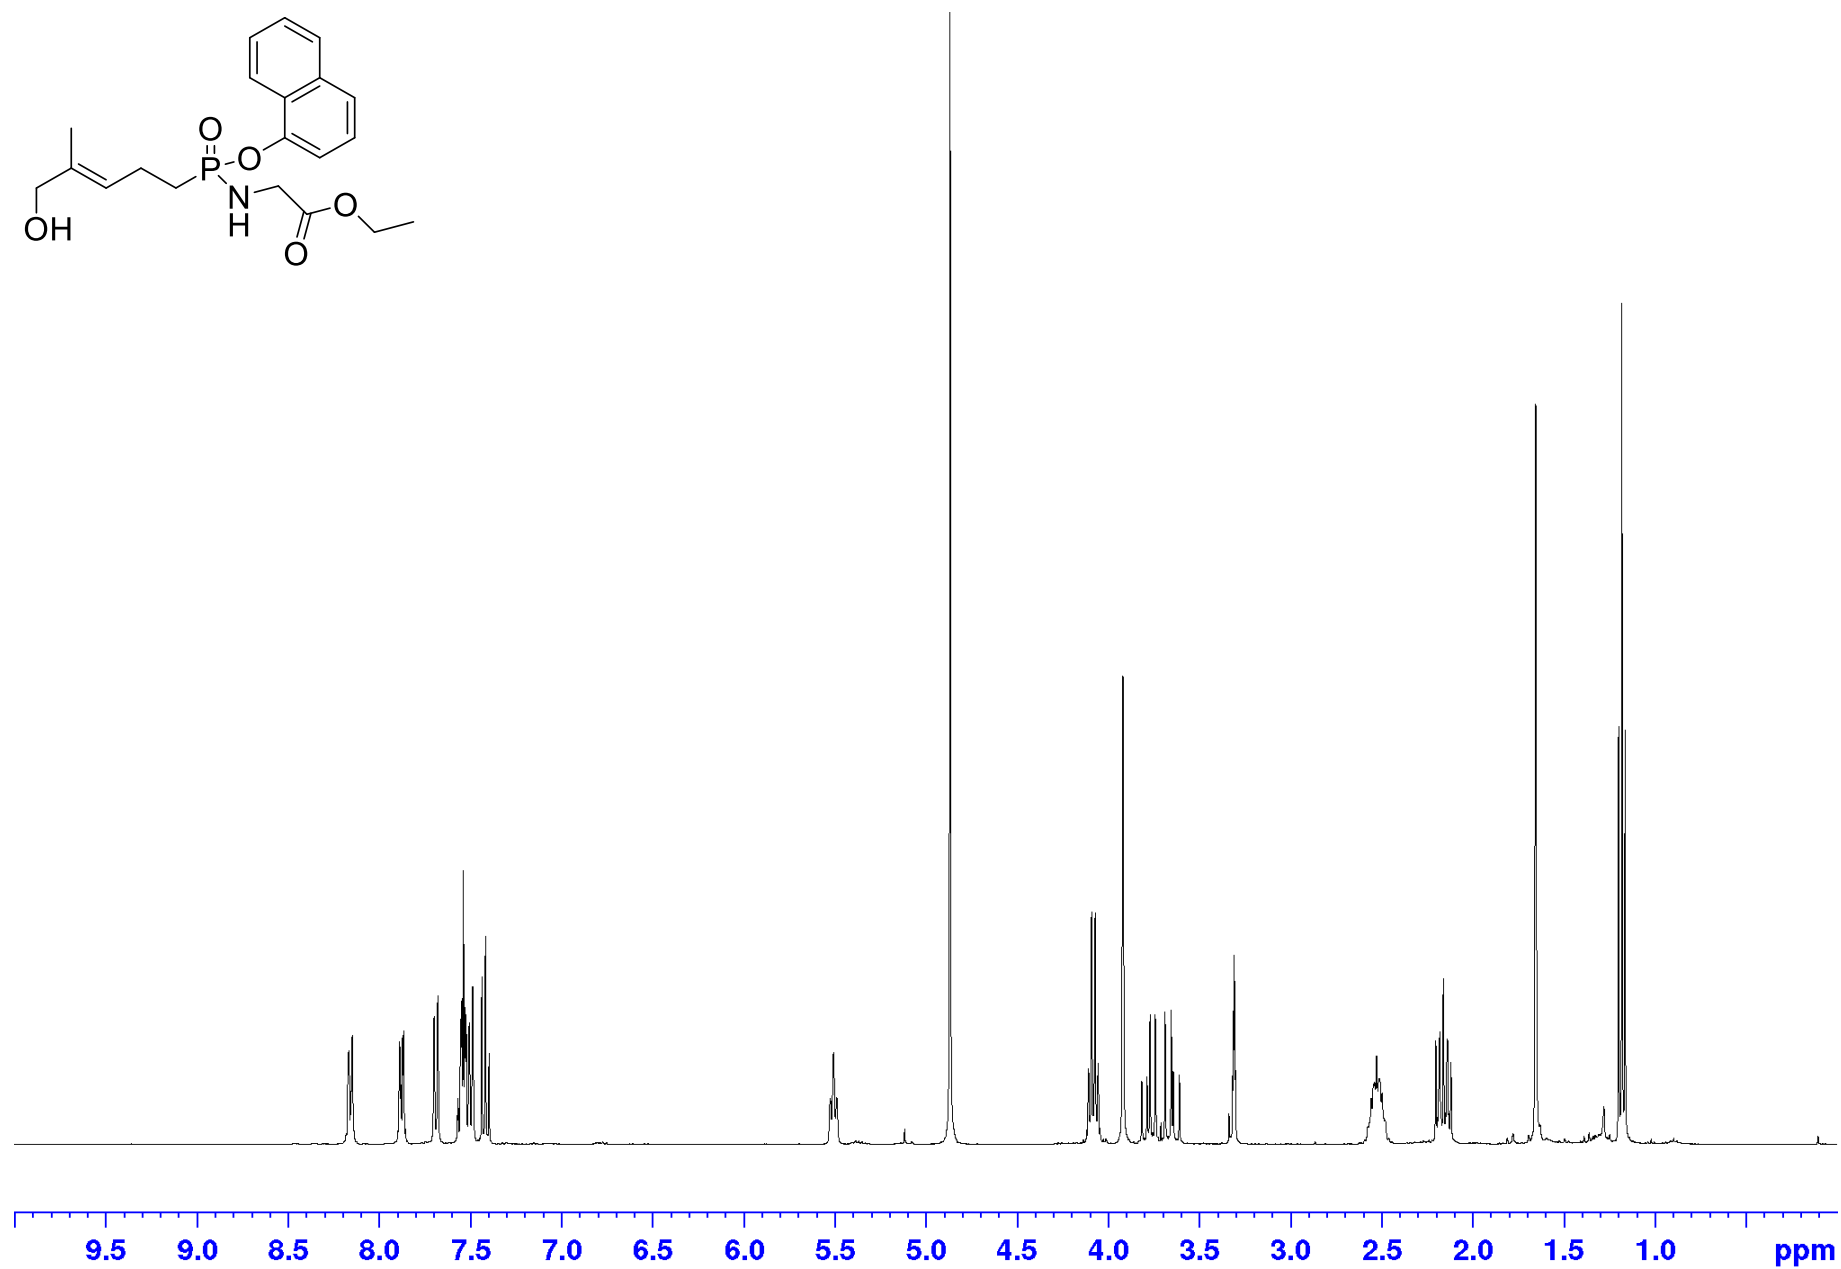

400 MHz <sup>1</sup>H NMR spectrum of compound 9e.

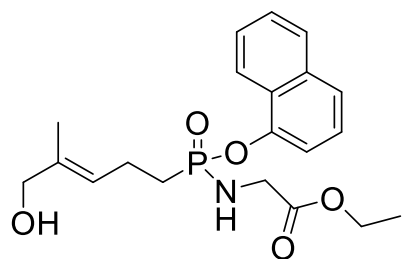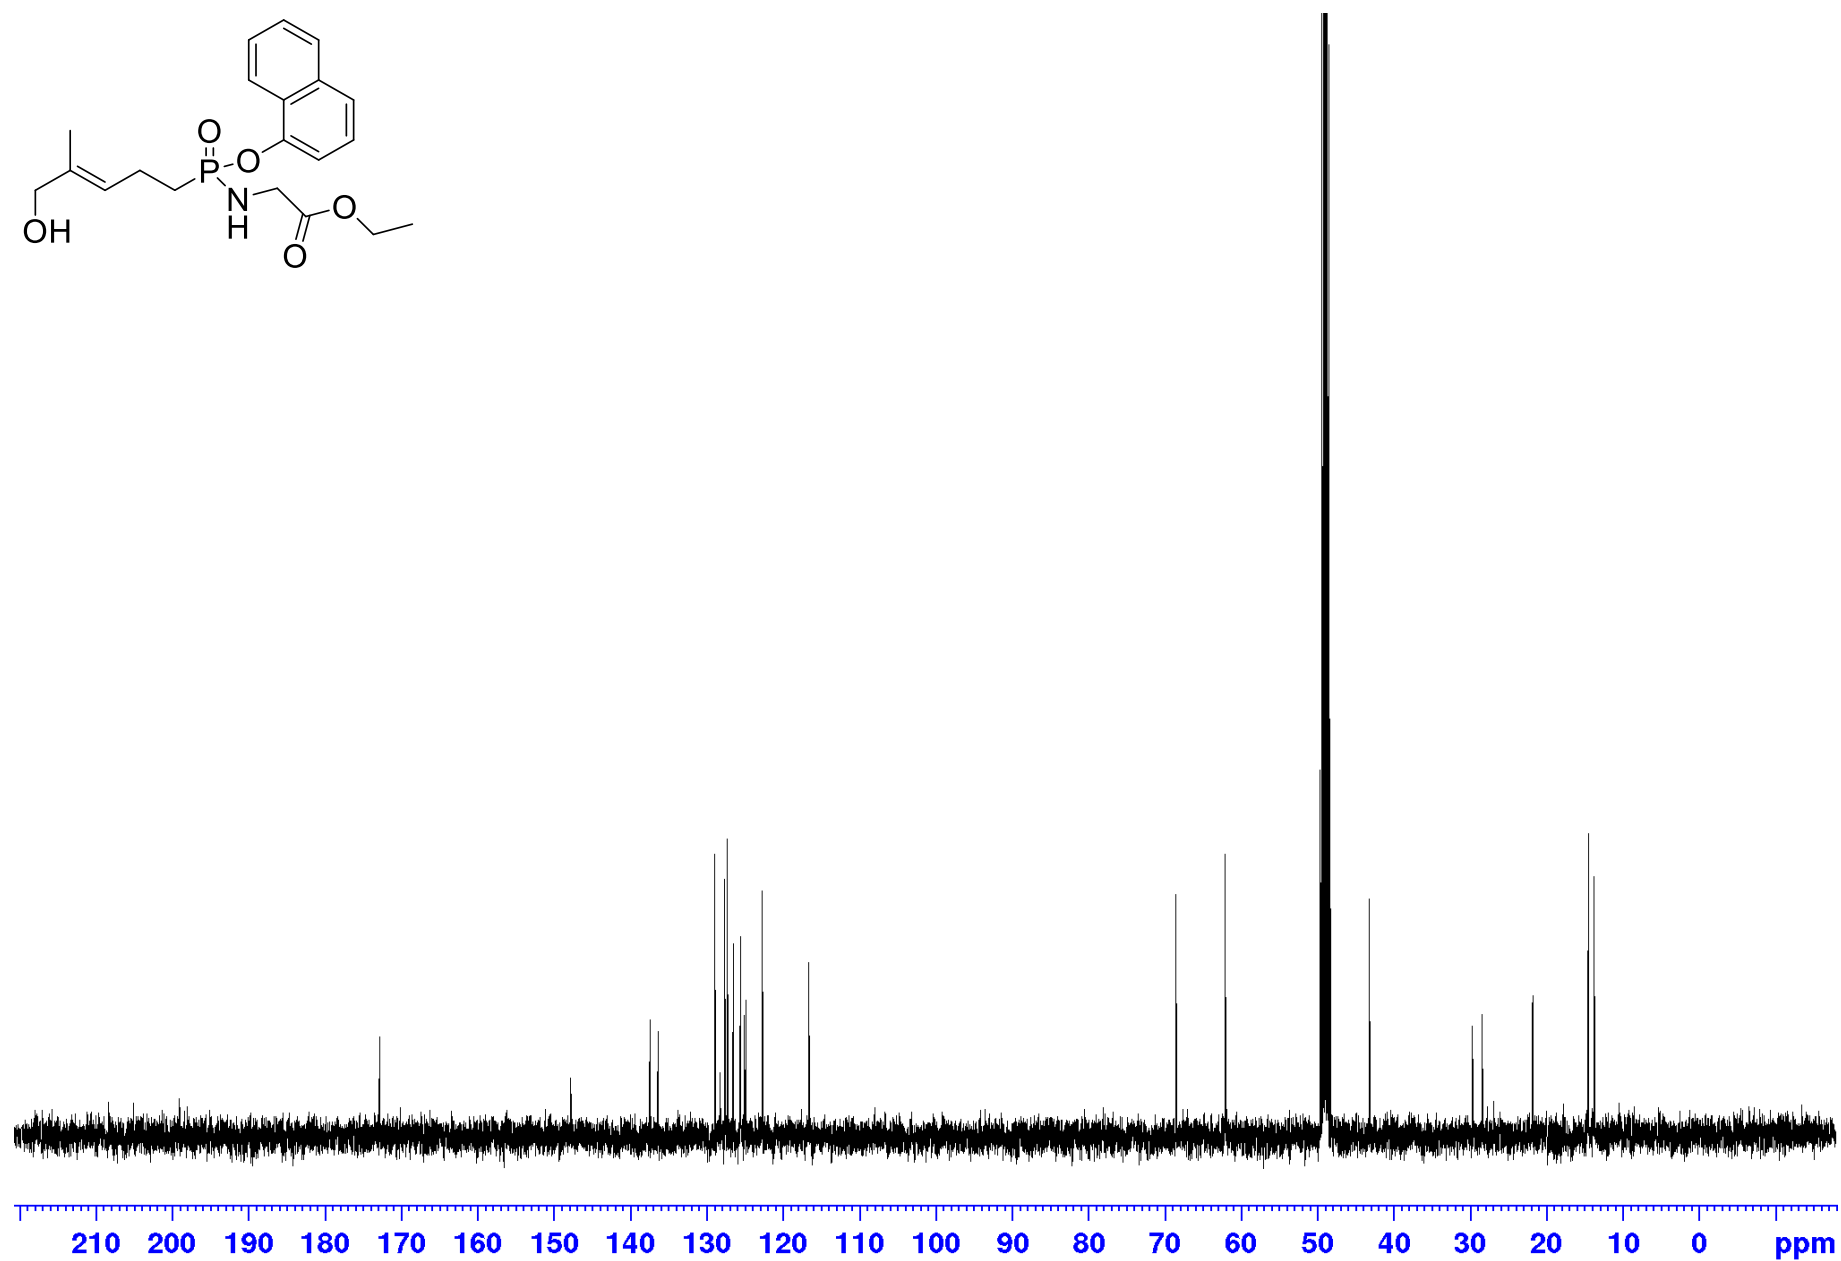

100 MHz  $^{13}\text{C}$  NMR spectrum of compound 9e.

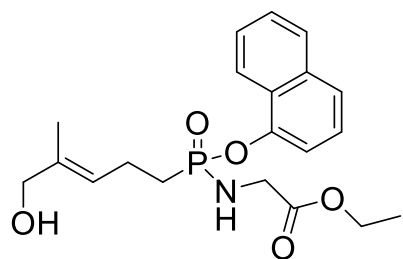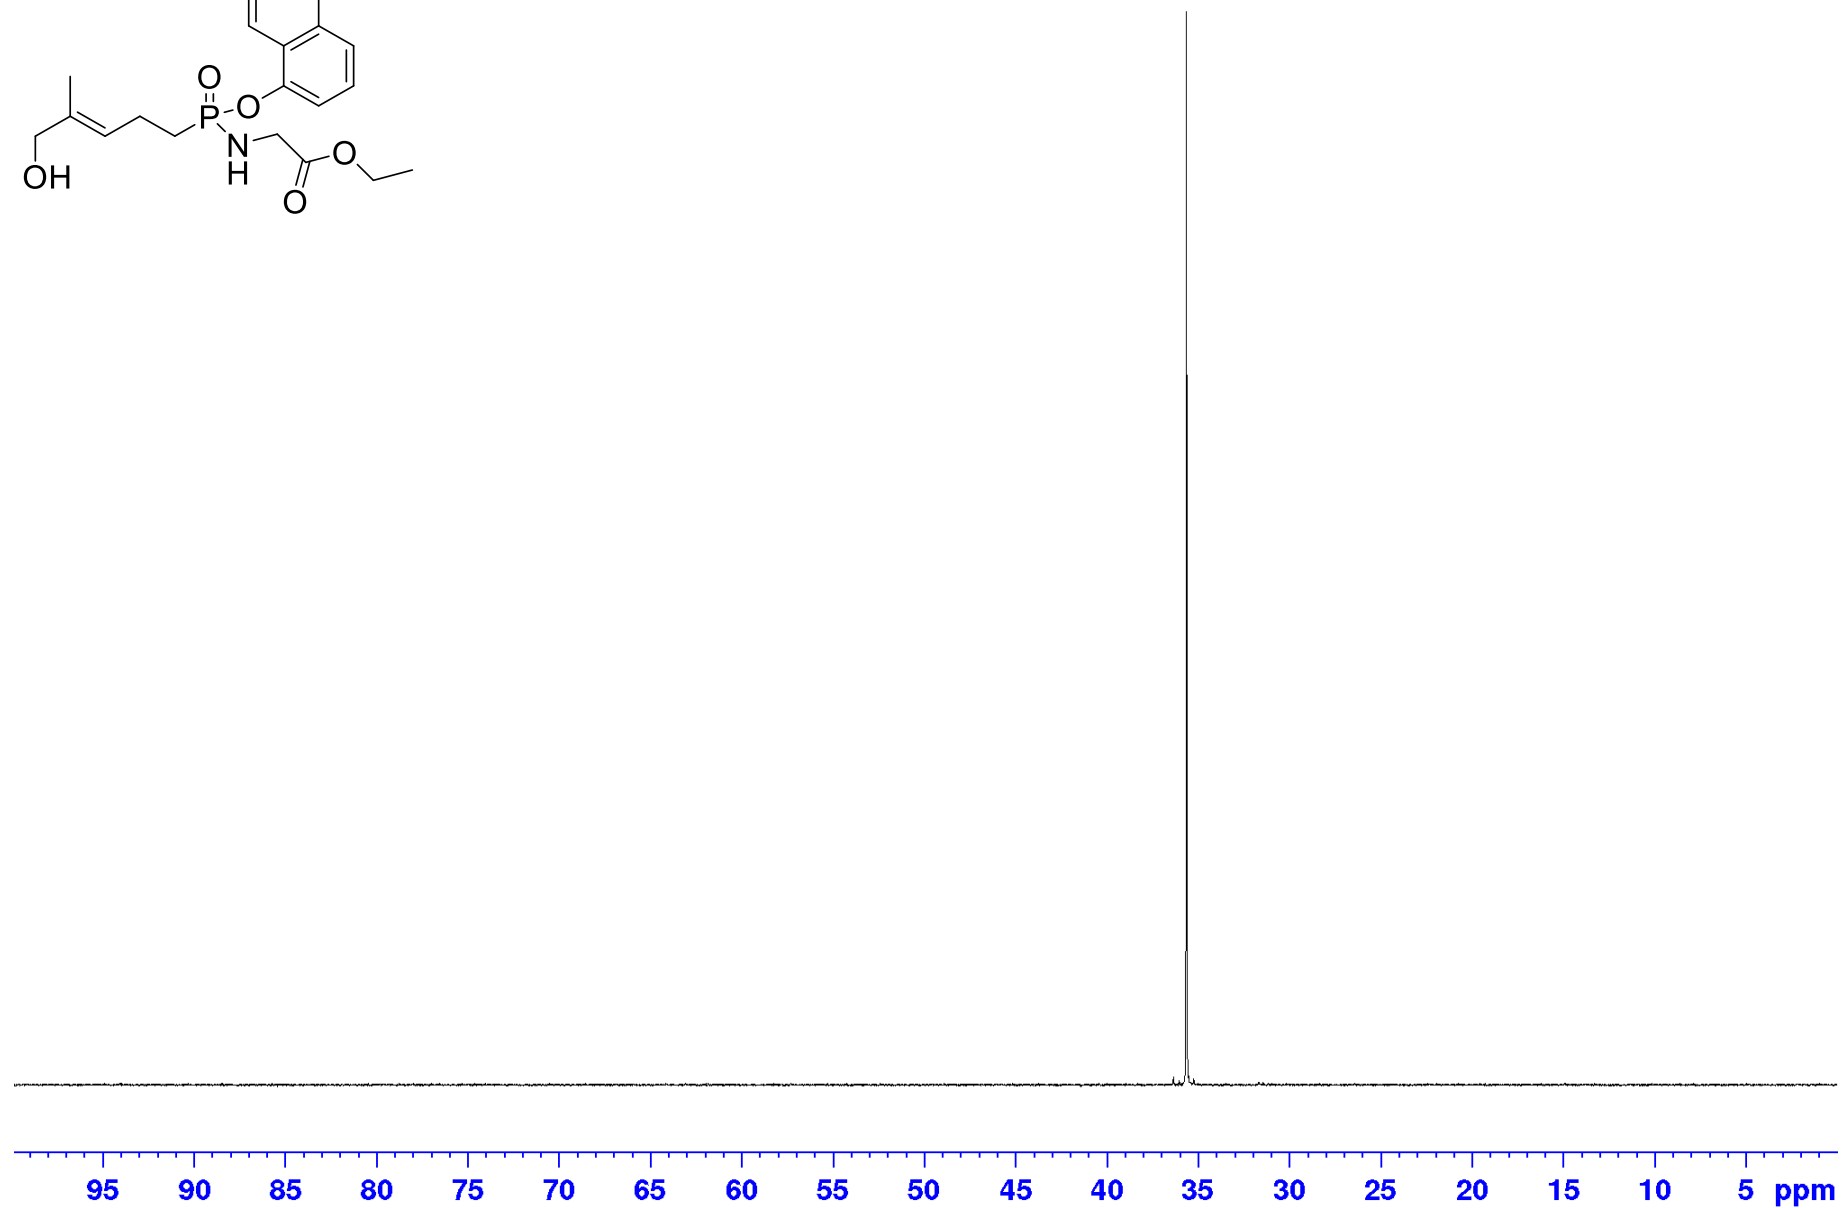

161 MHz  $^{31}\text{P}$  NMR spectrum of compound 9e.

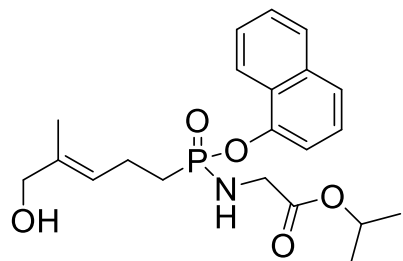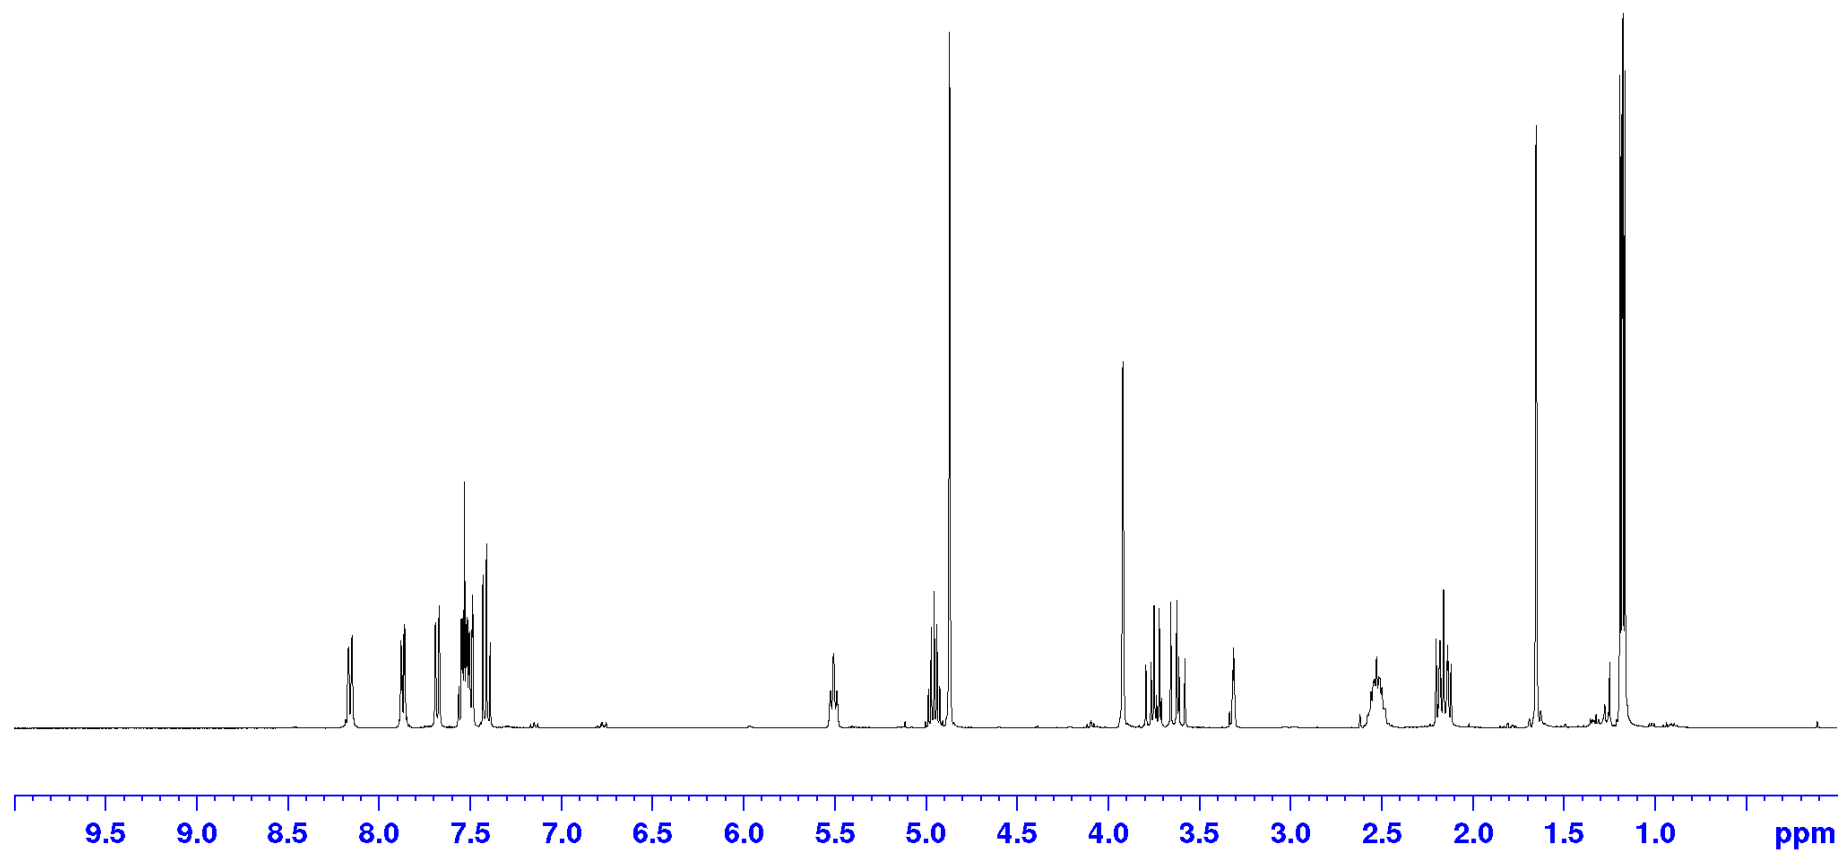

400 MHz  $^1\text{H}$  NMR spectrum of compound **9f**.

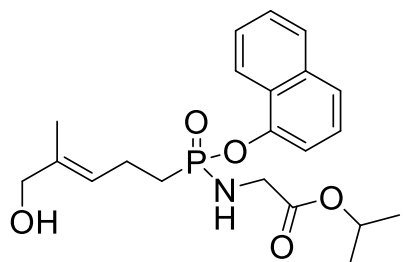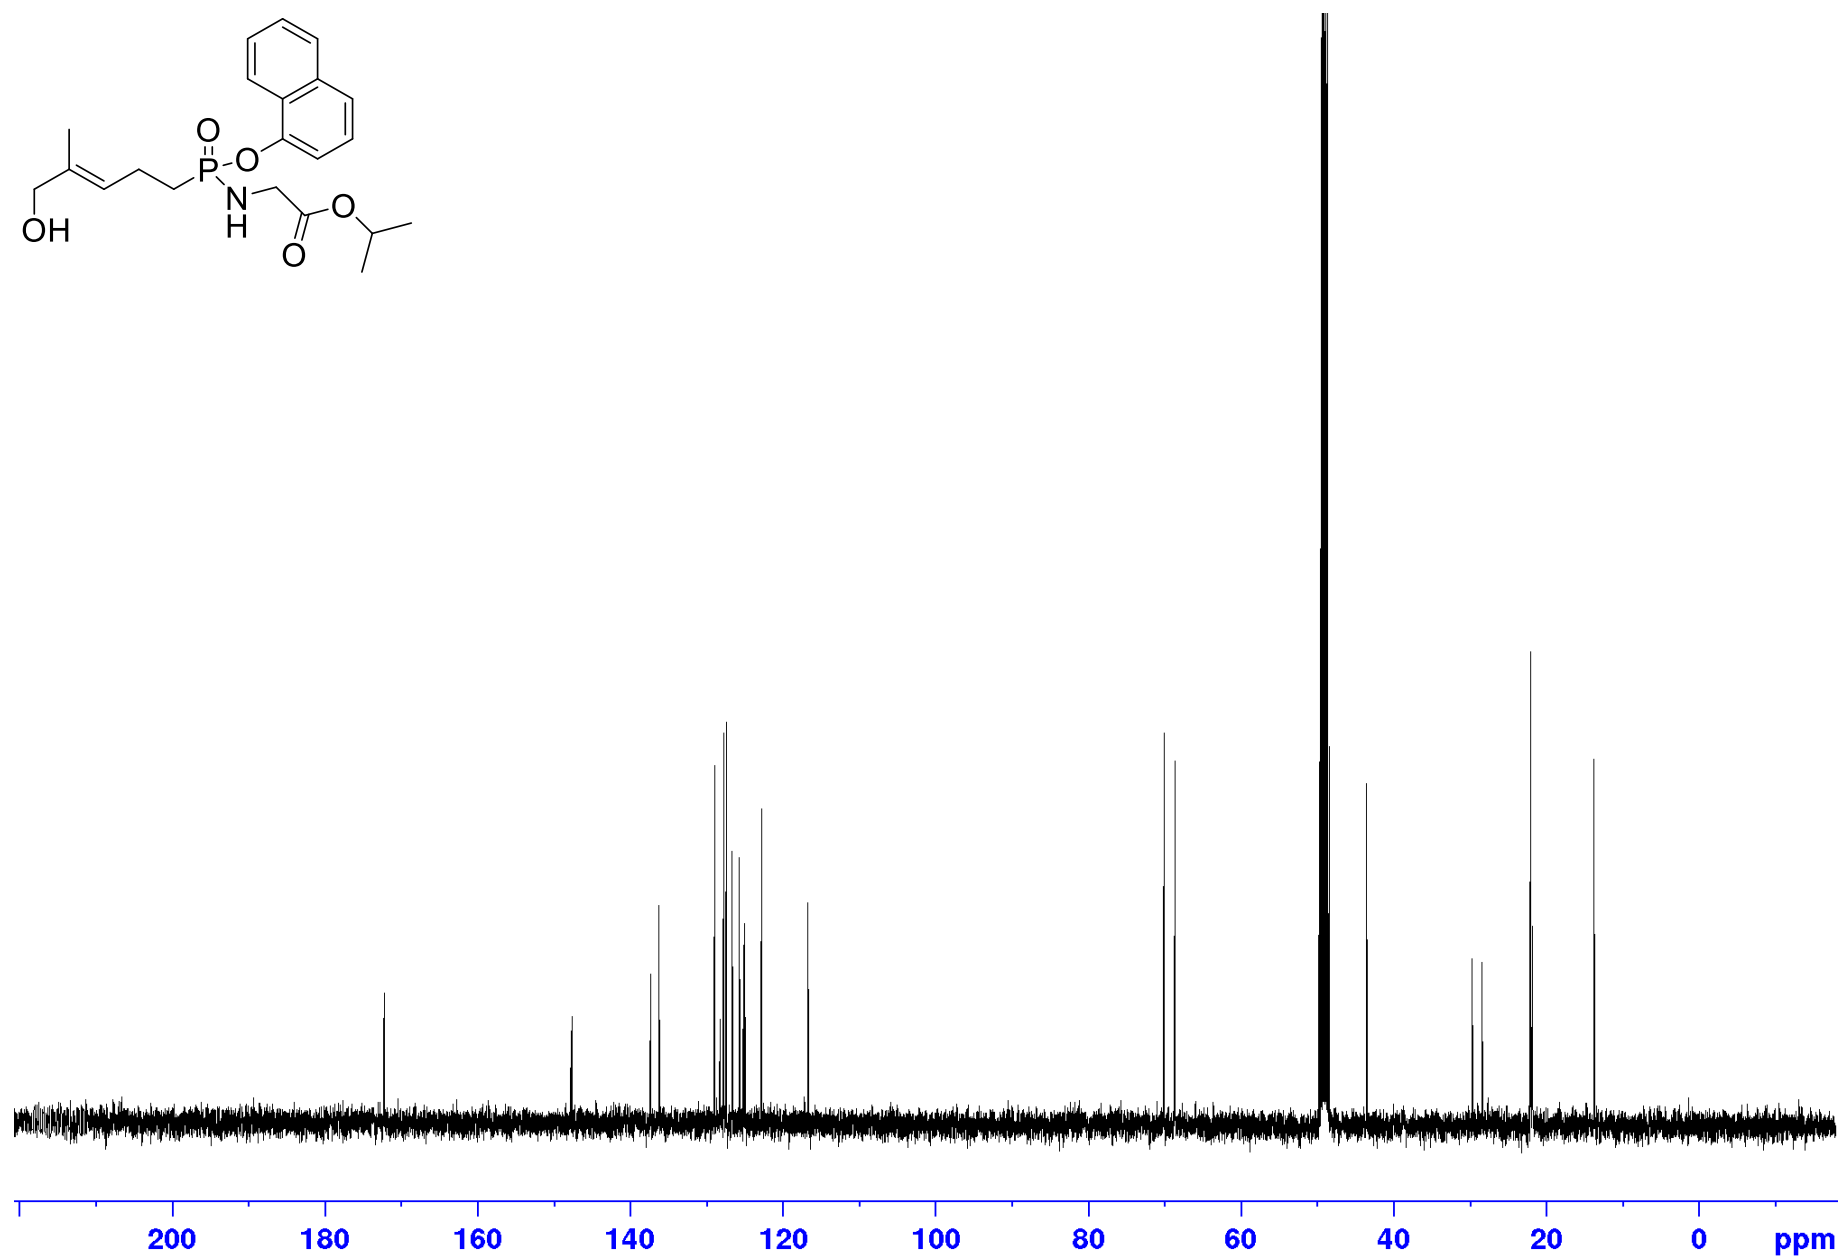

100 MHz  $^{13}\text{C}$  NMR spectrum of compound 9f.

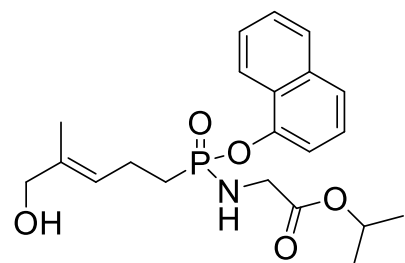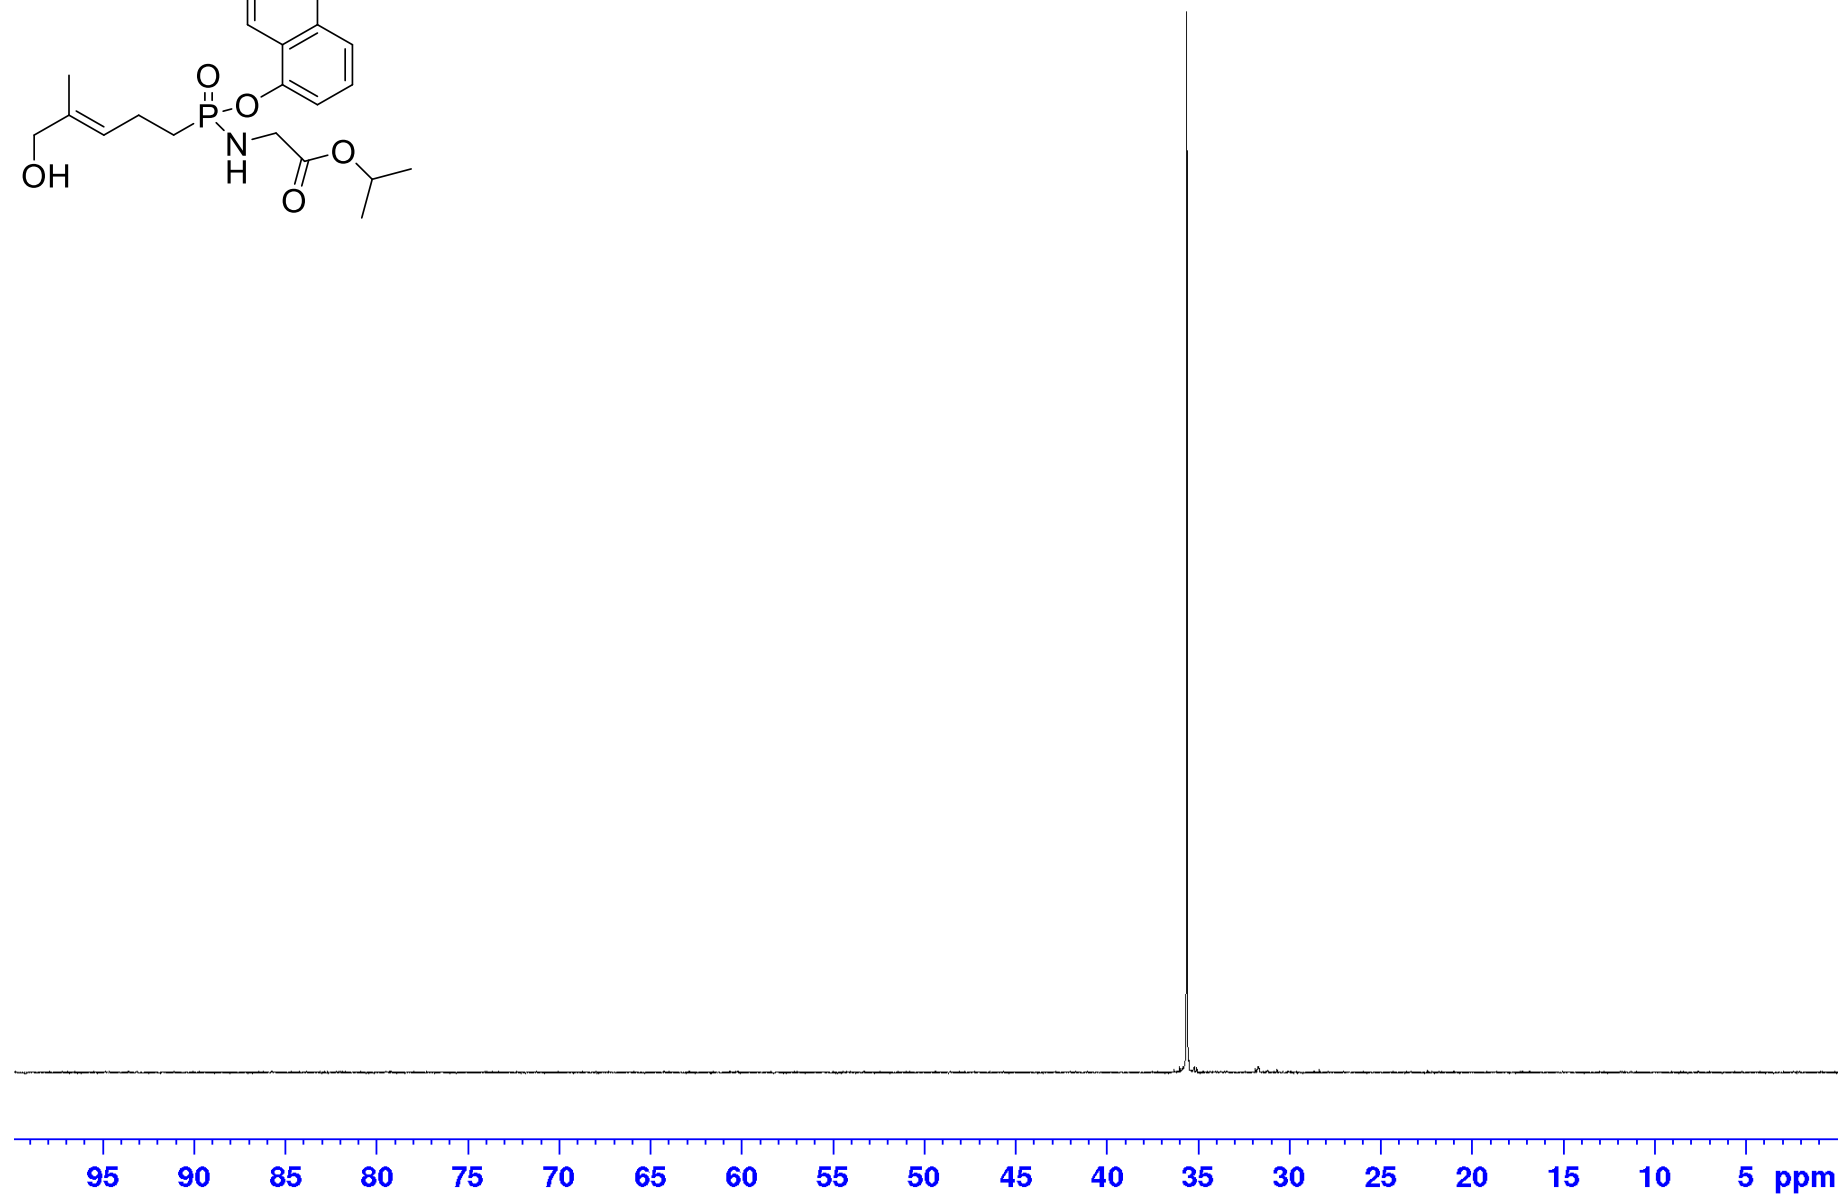

161 MHz  $^{31}\text{P}$  NMR spectrum of compound 9f.

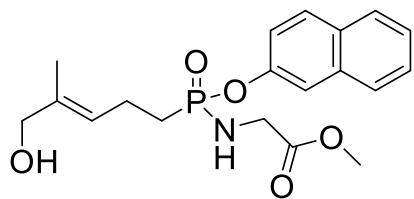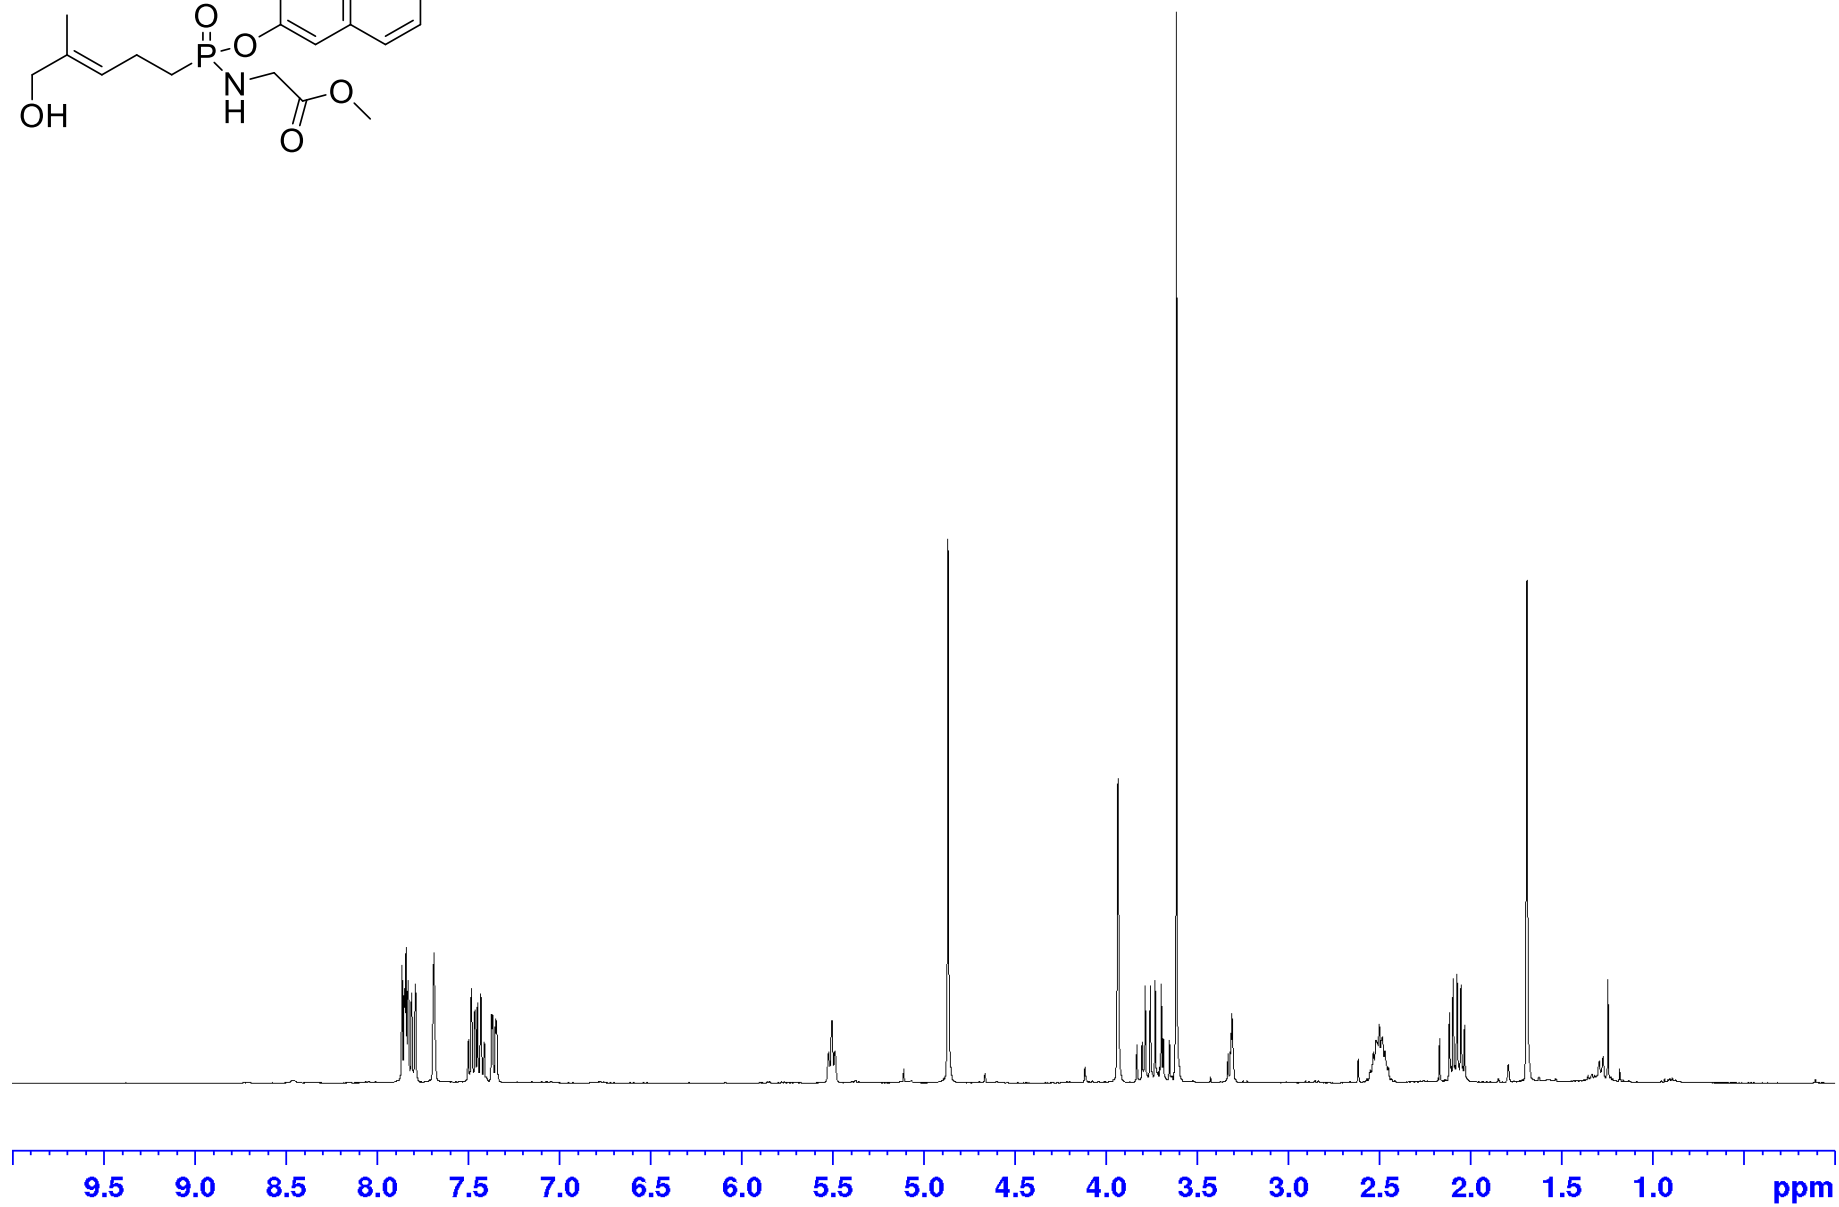

400 MHz  $^1\text{H}$  NMR spectrum of compound **9g**.



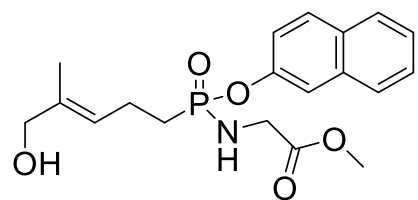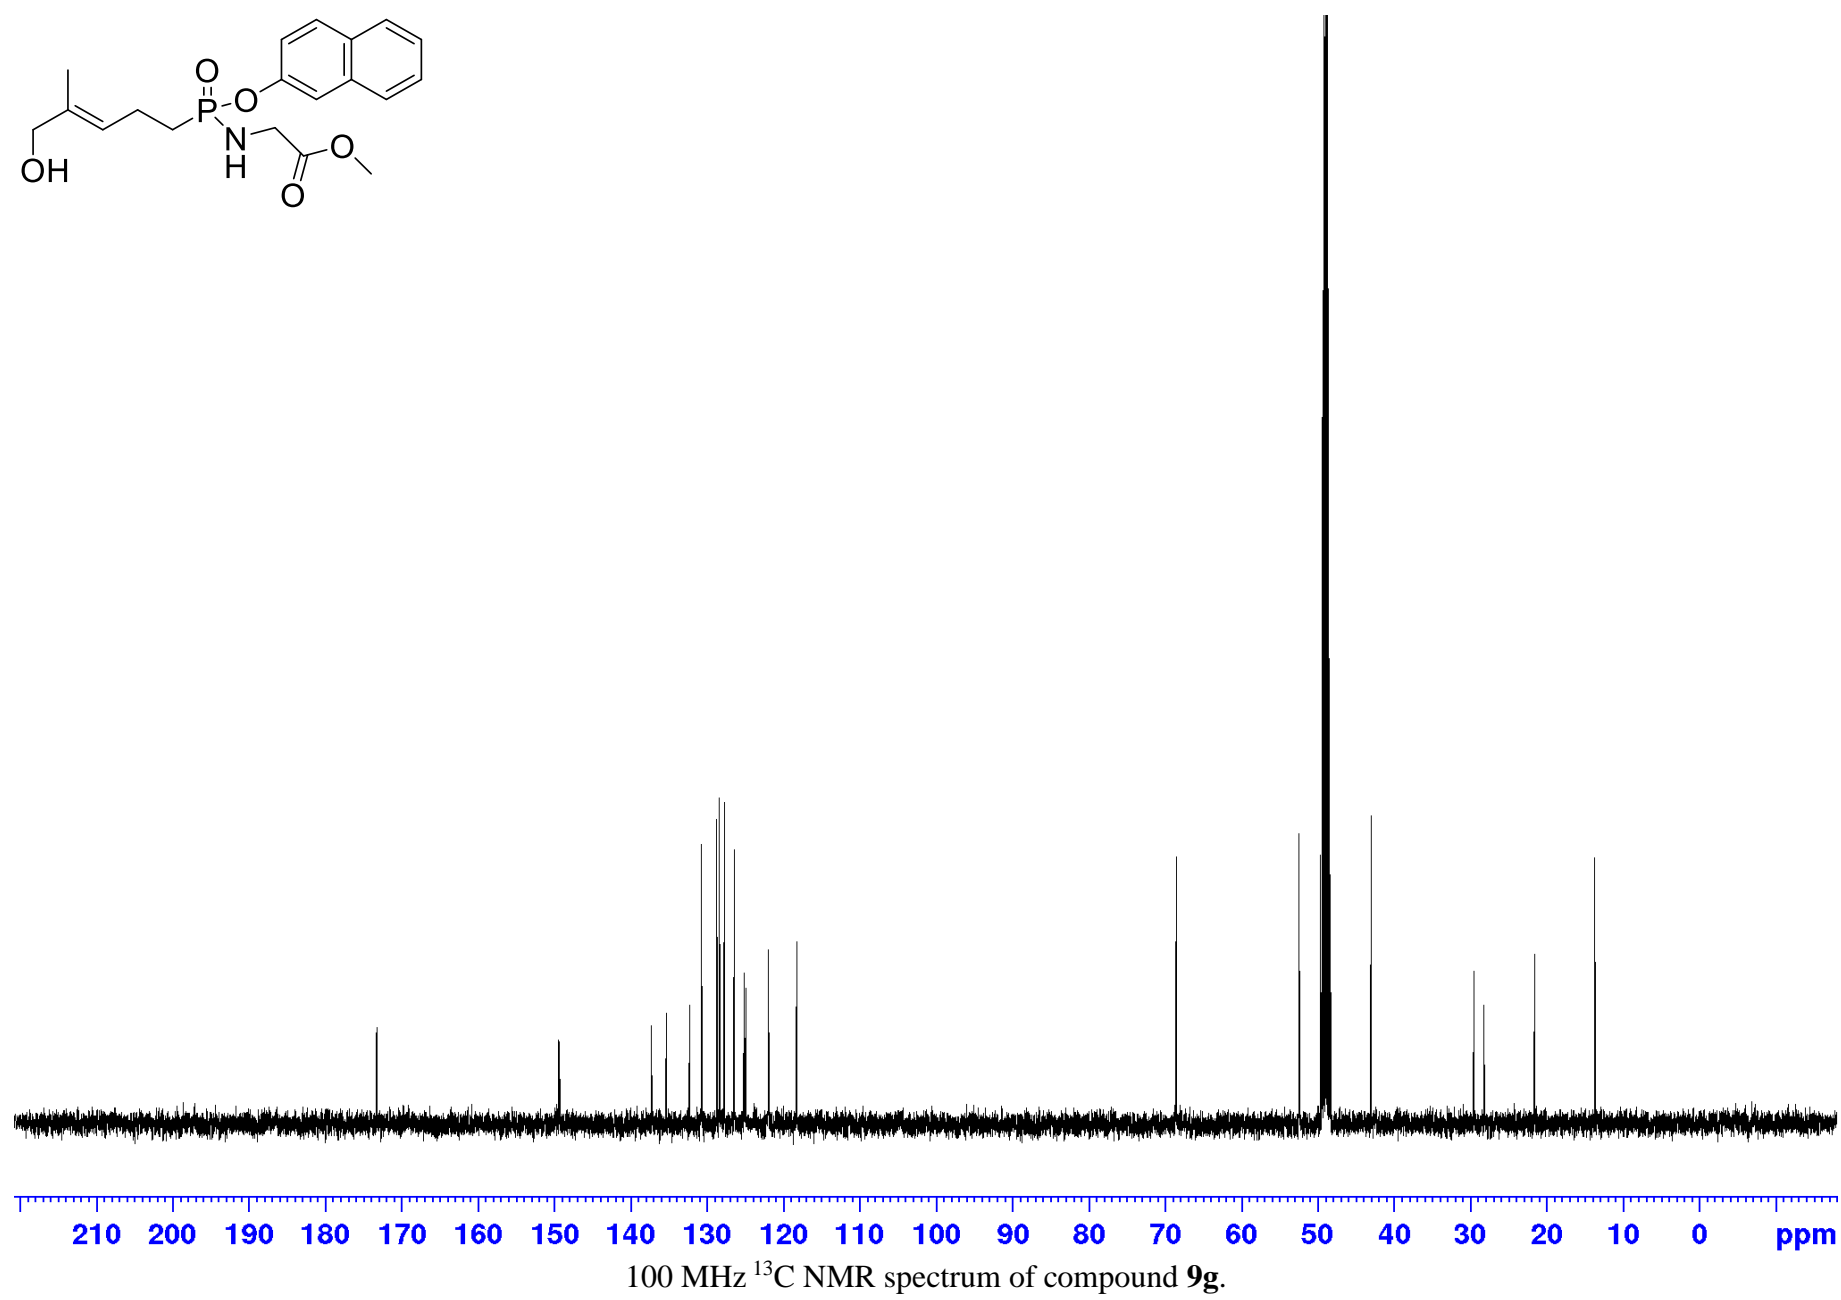

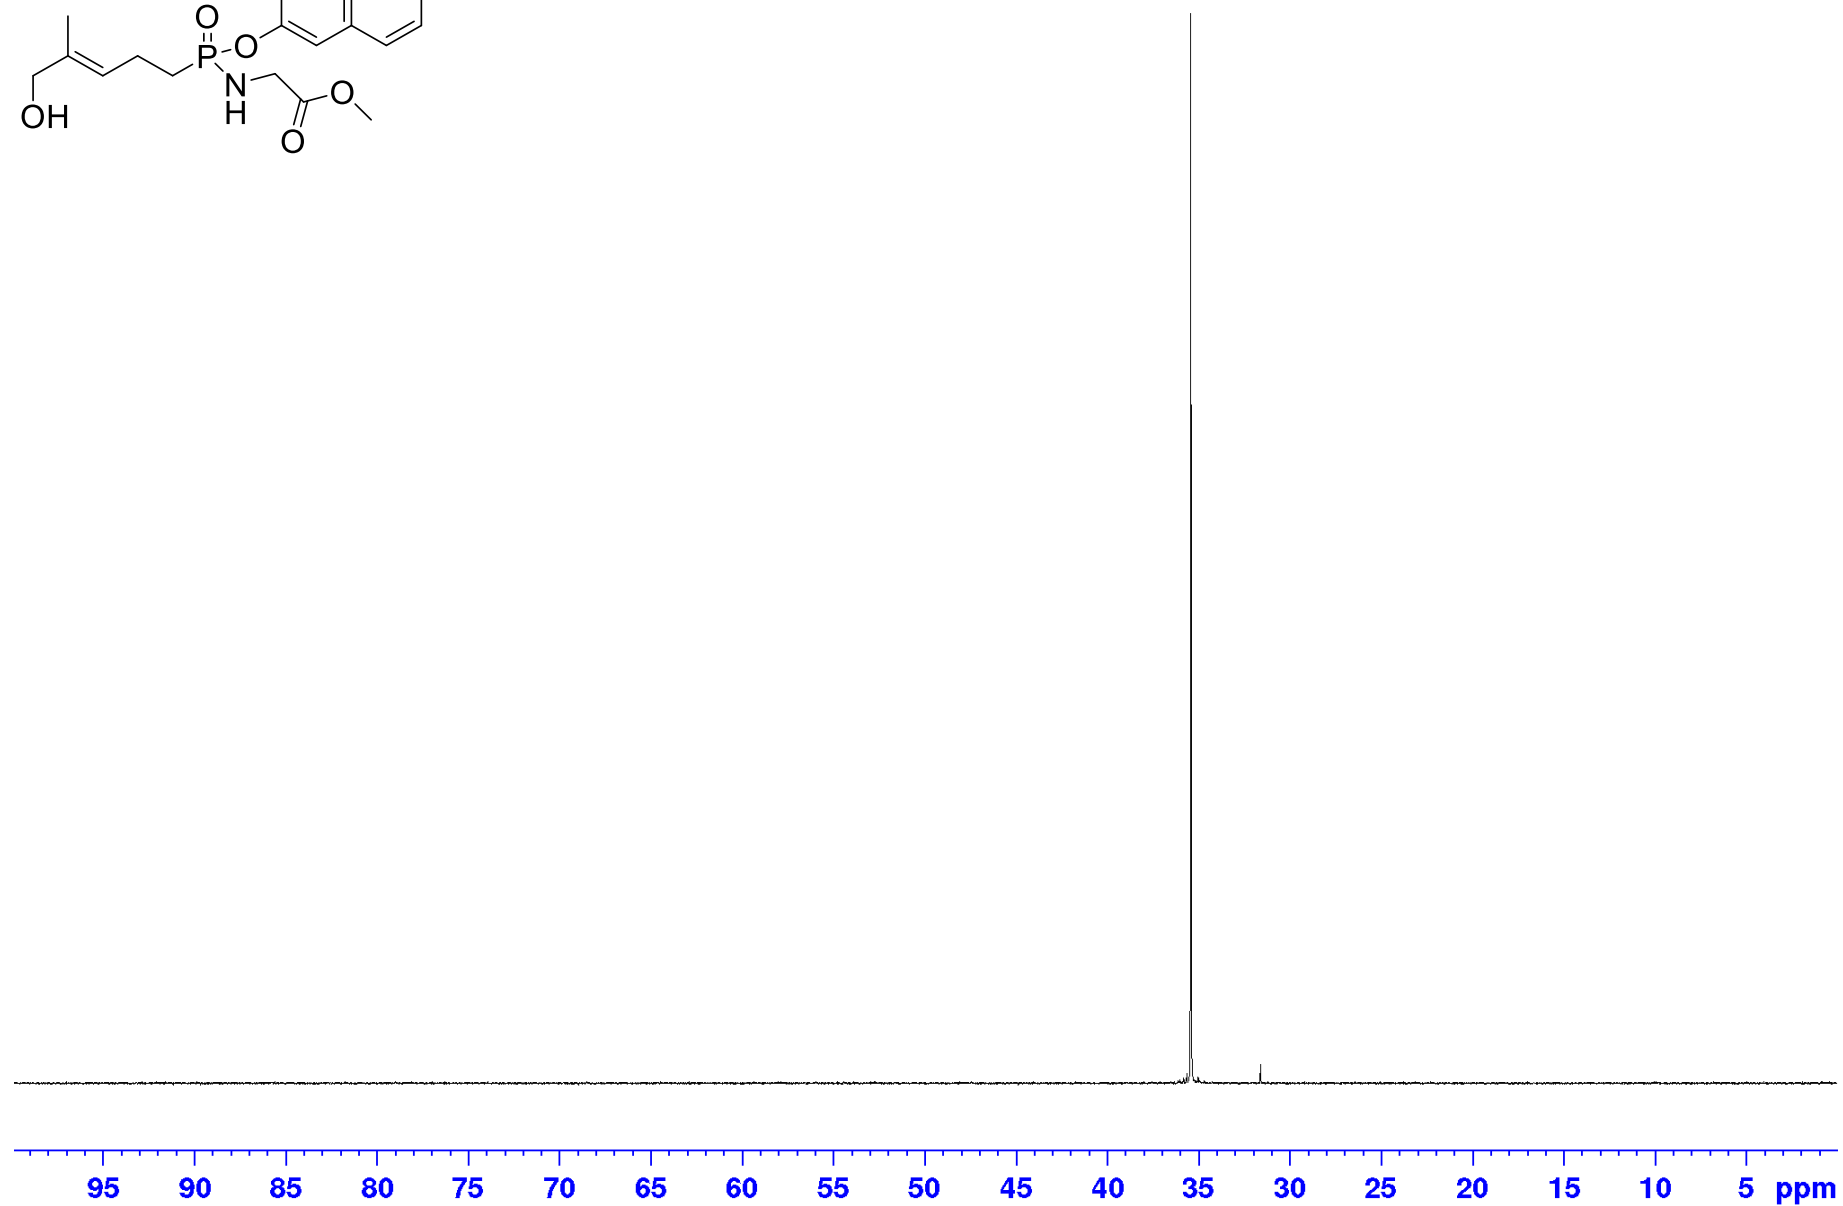

161 MHz  $^{31}\text{P}$  NMR spectrum of compound 9g.

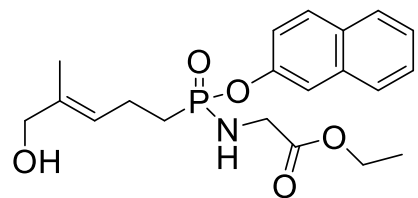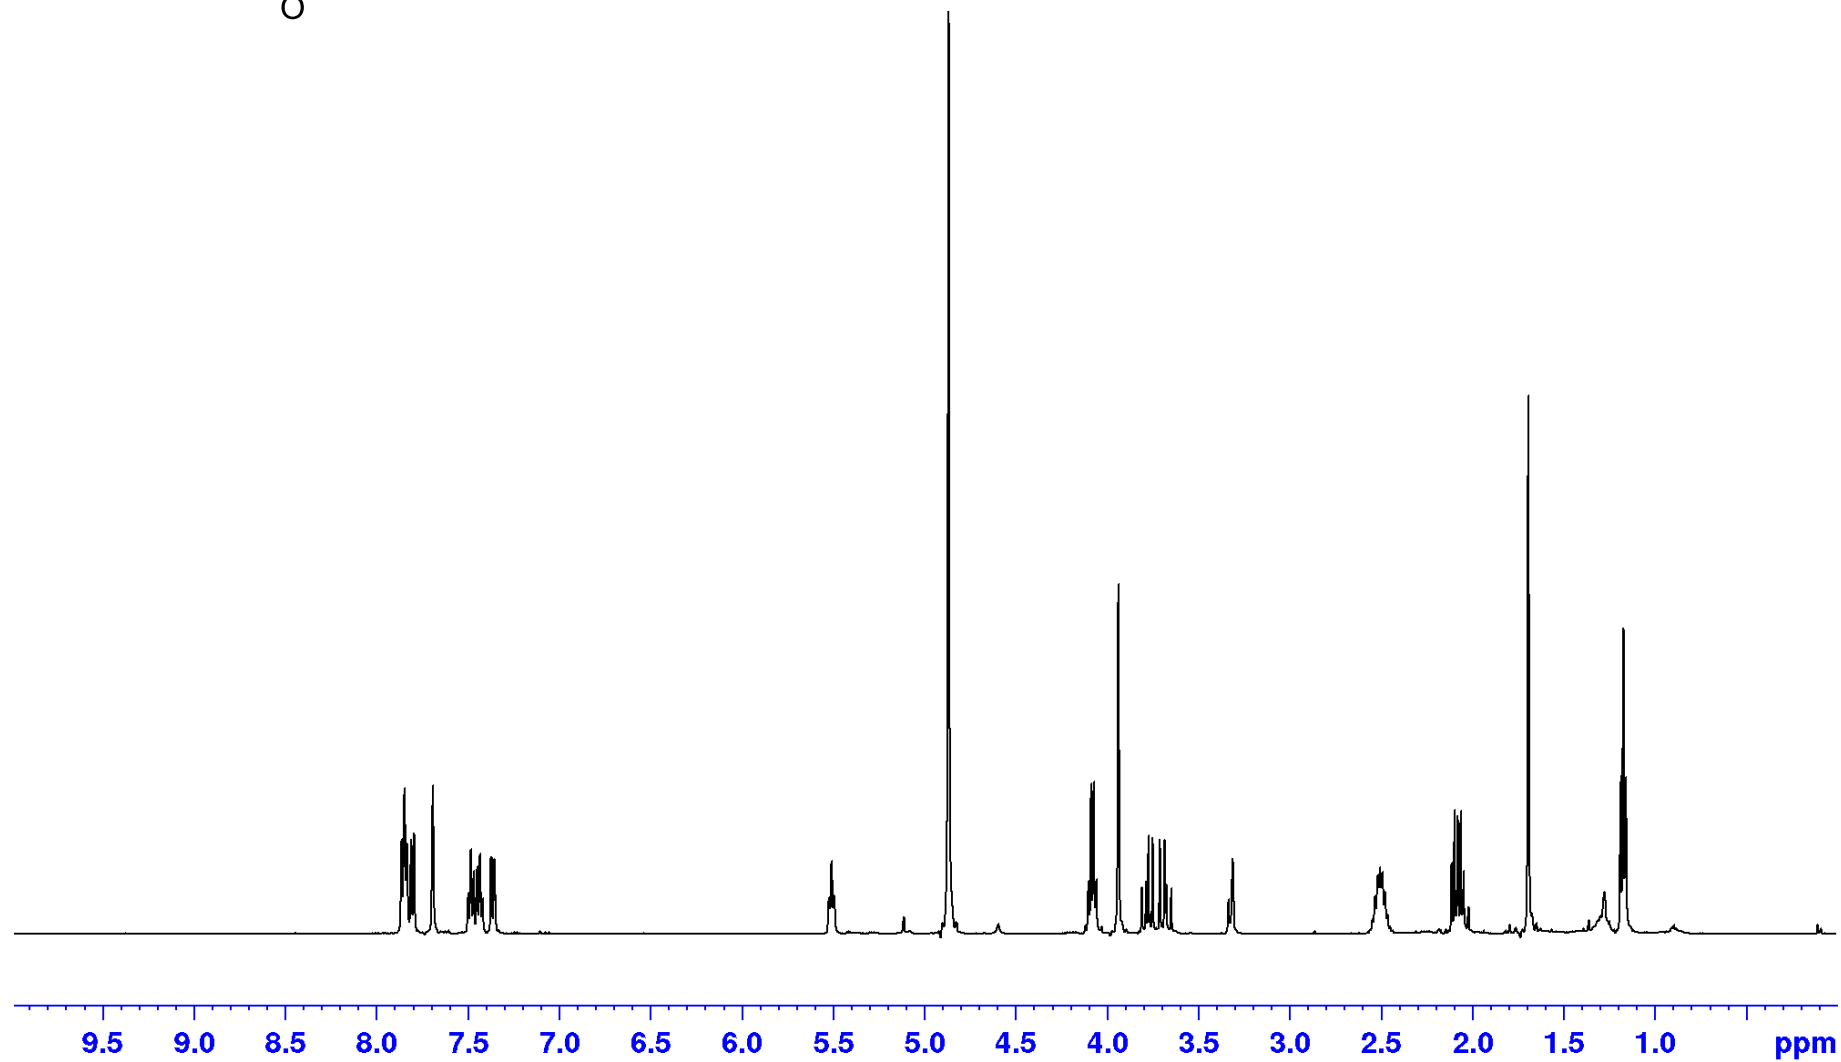

500 MHz  $^1\text{H}$  NMR spectrum of compound **9h**.

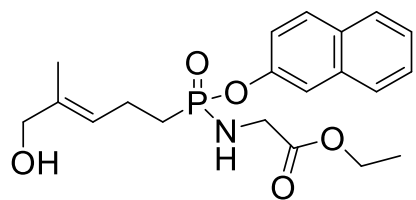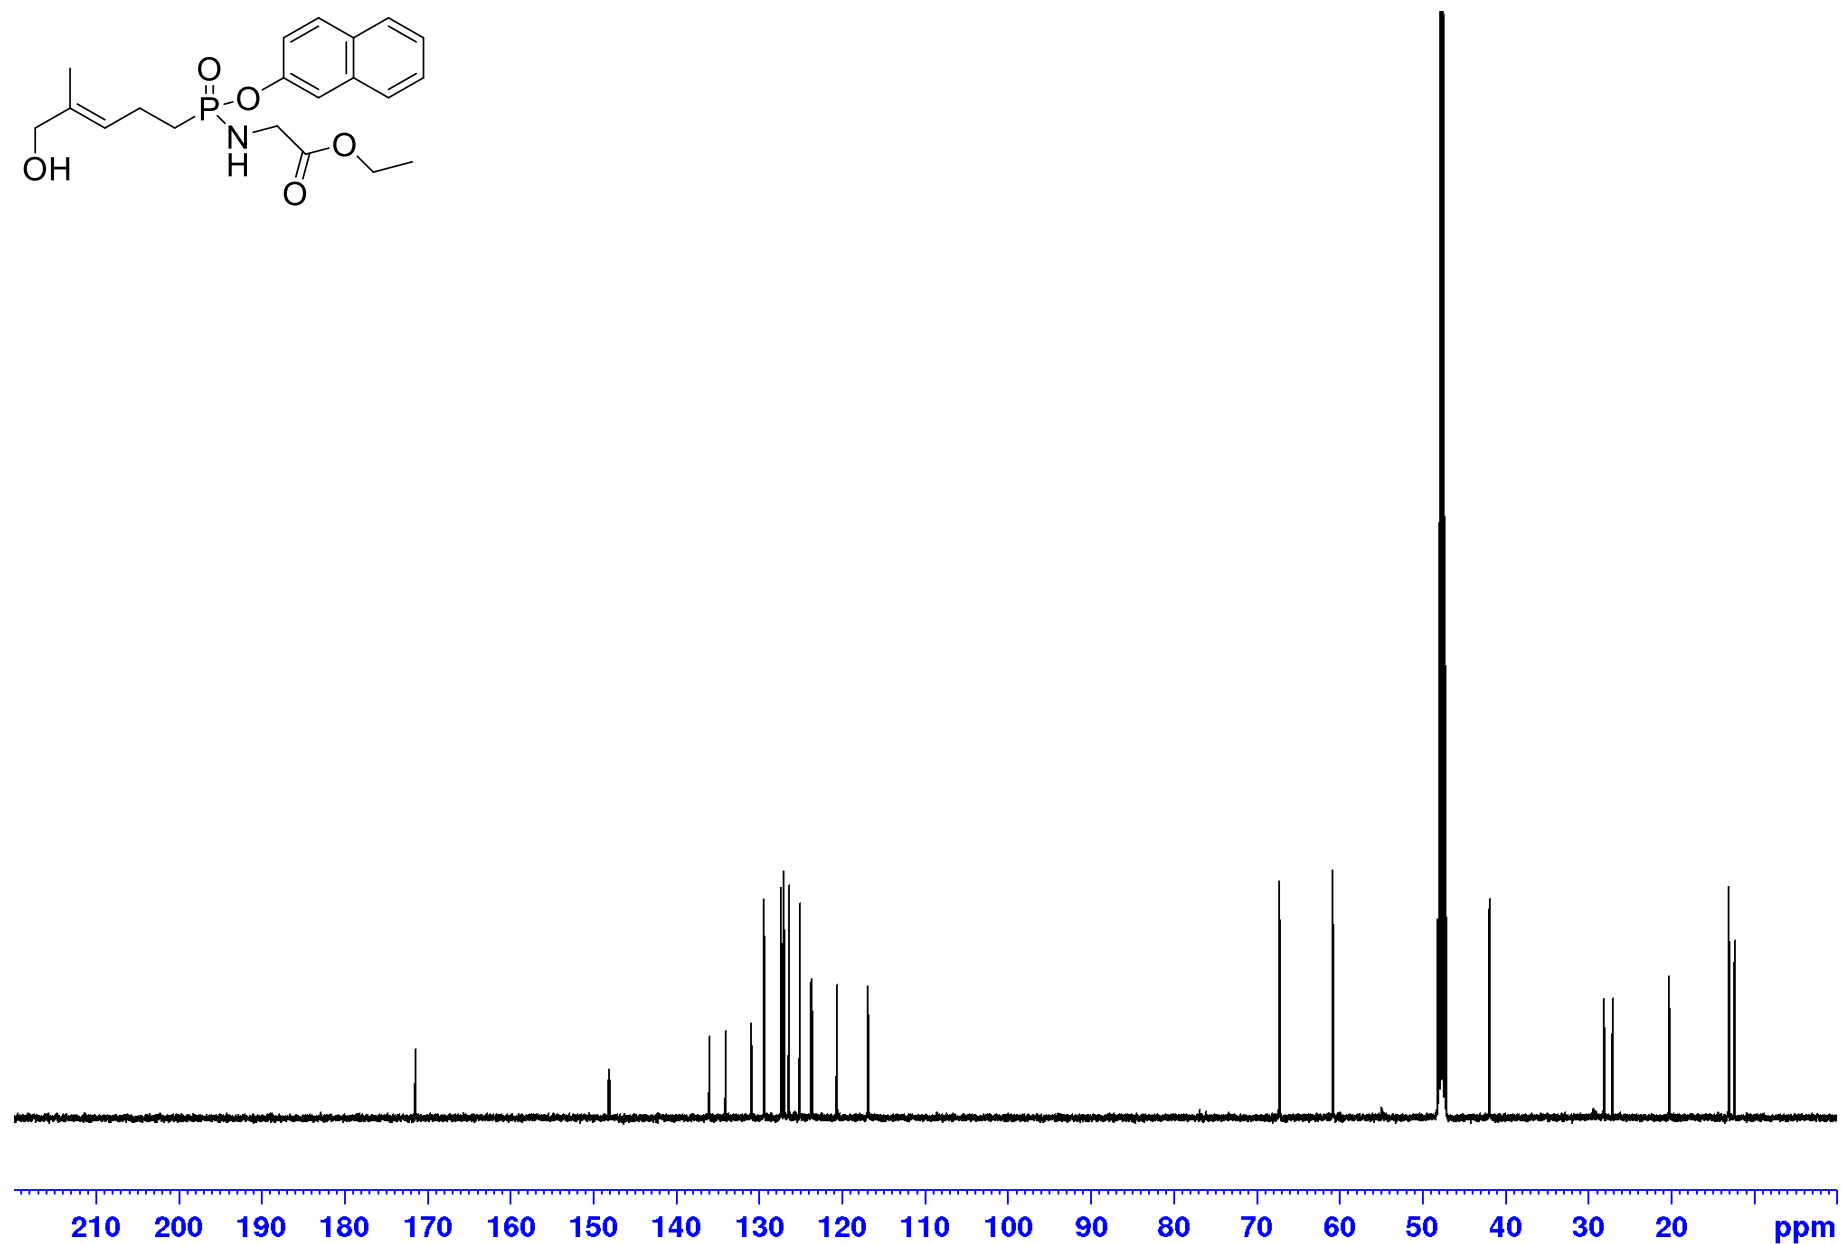

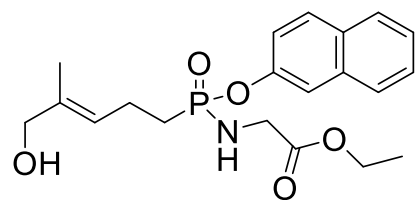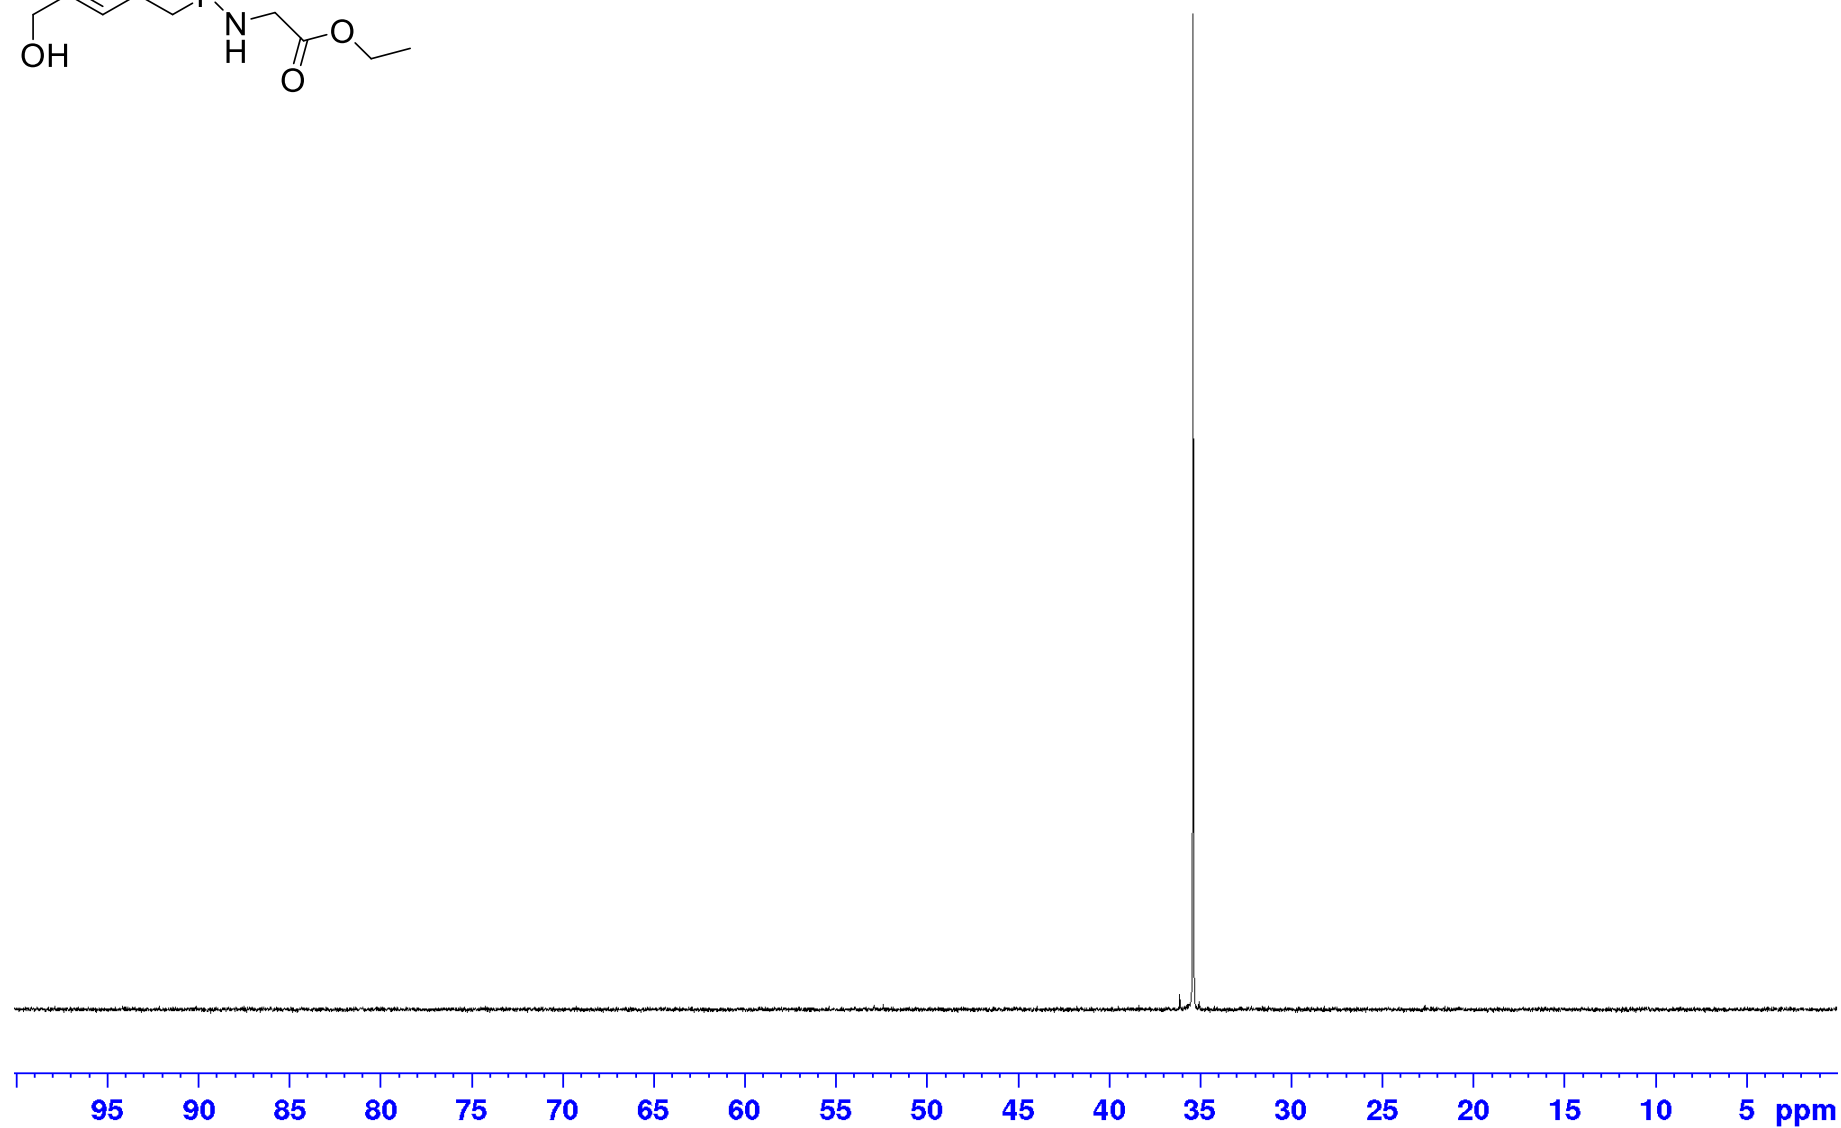

202 MHz  $^{31}\text{P}$  NMR spectrum of compound 9h.

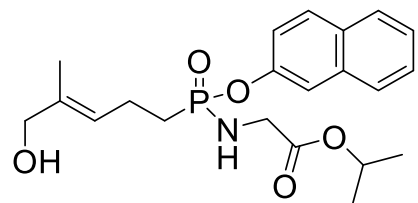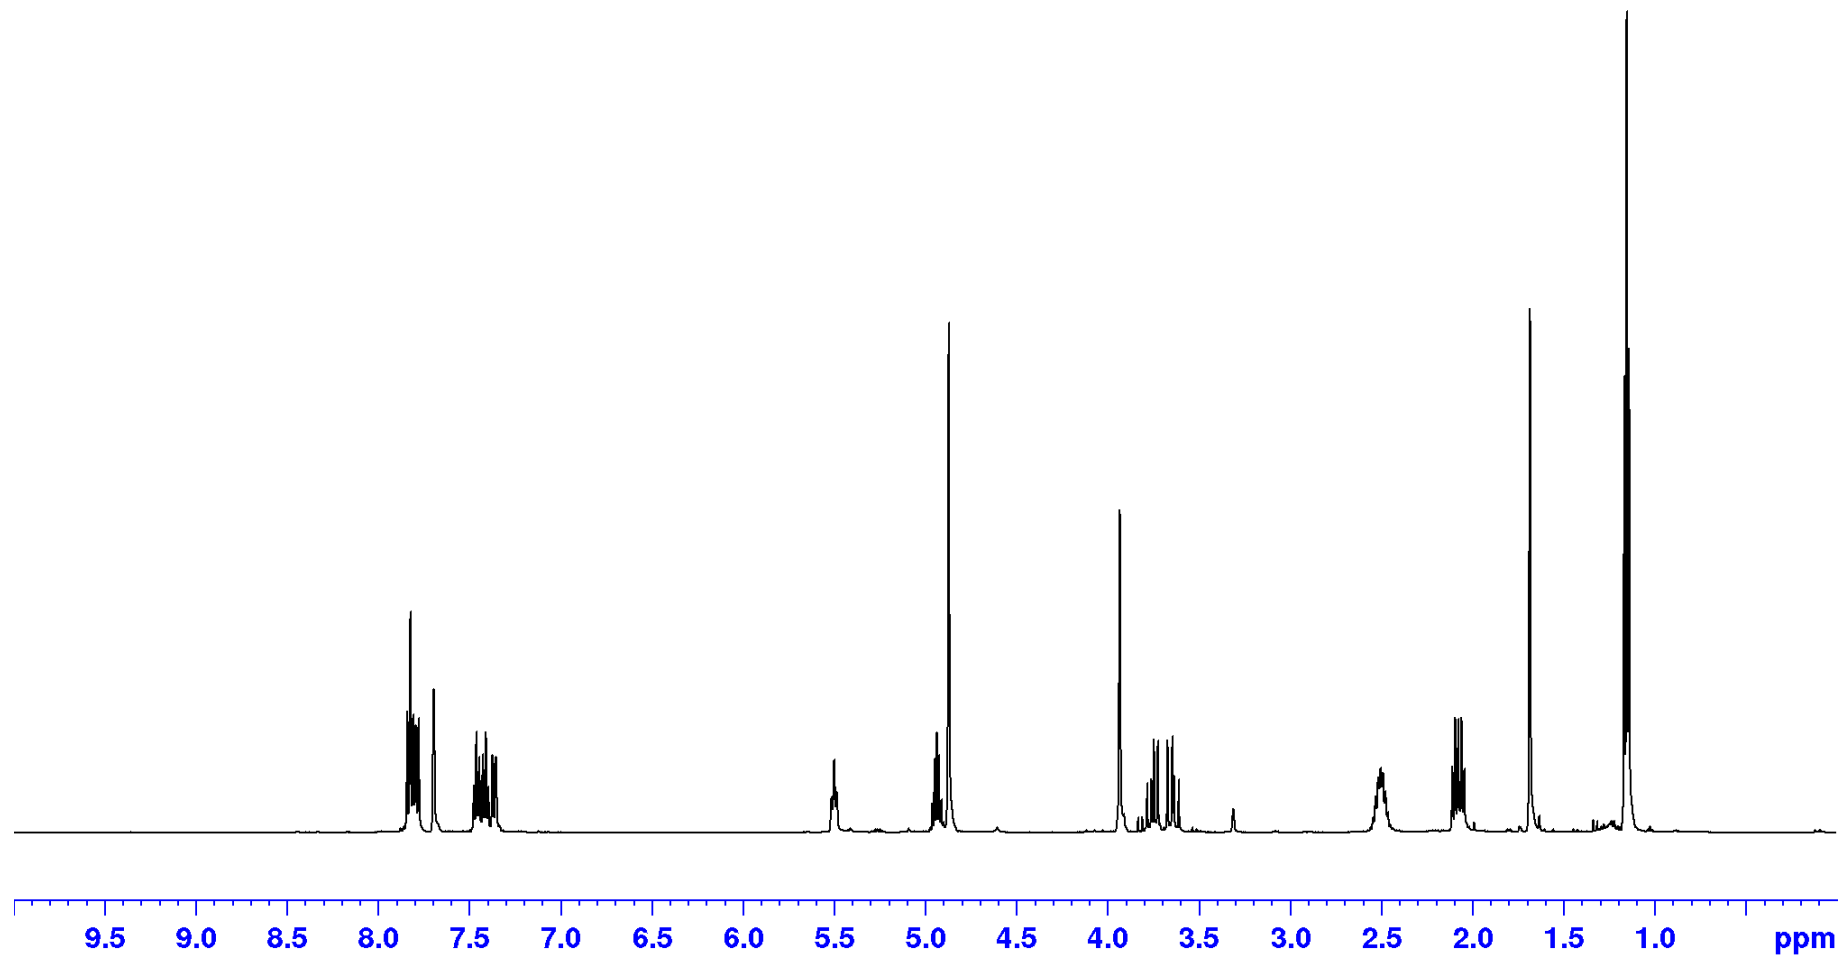

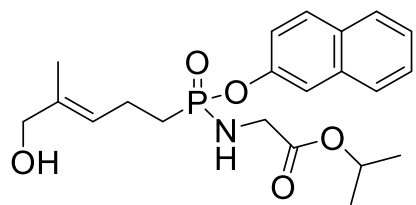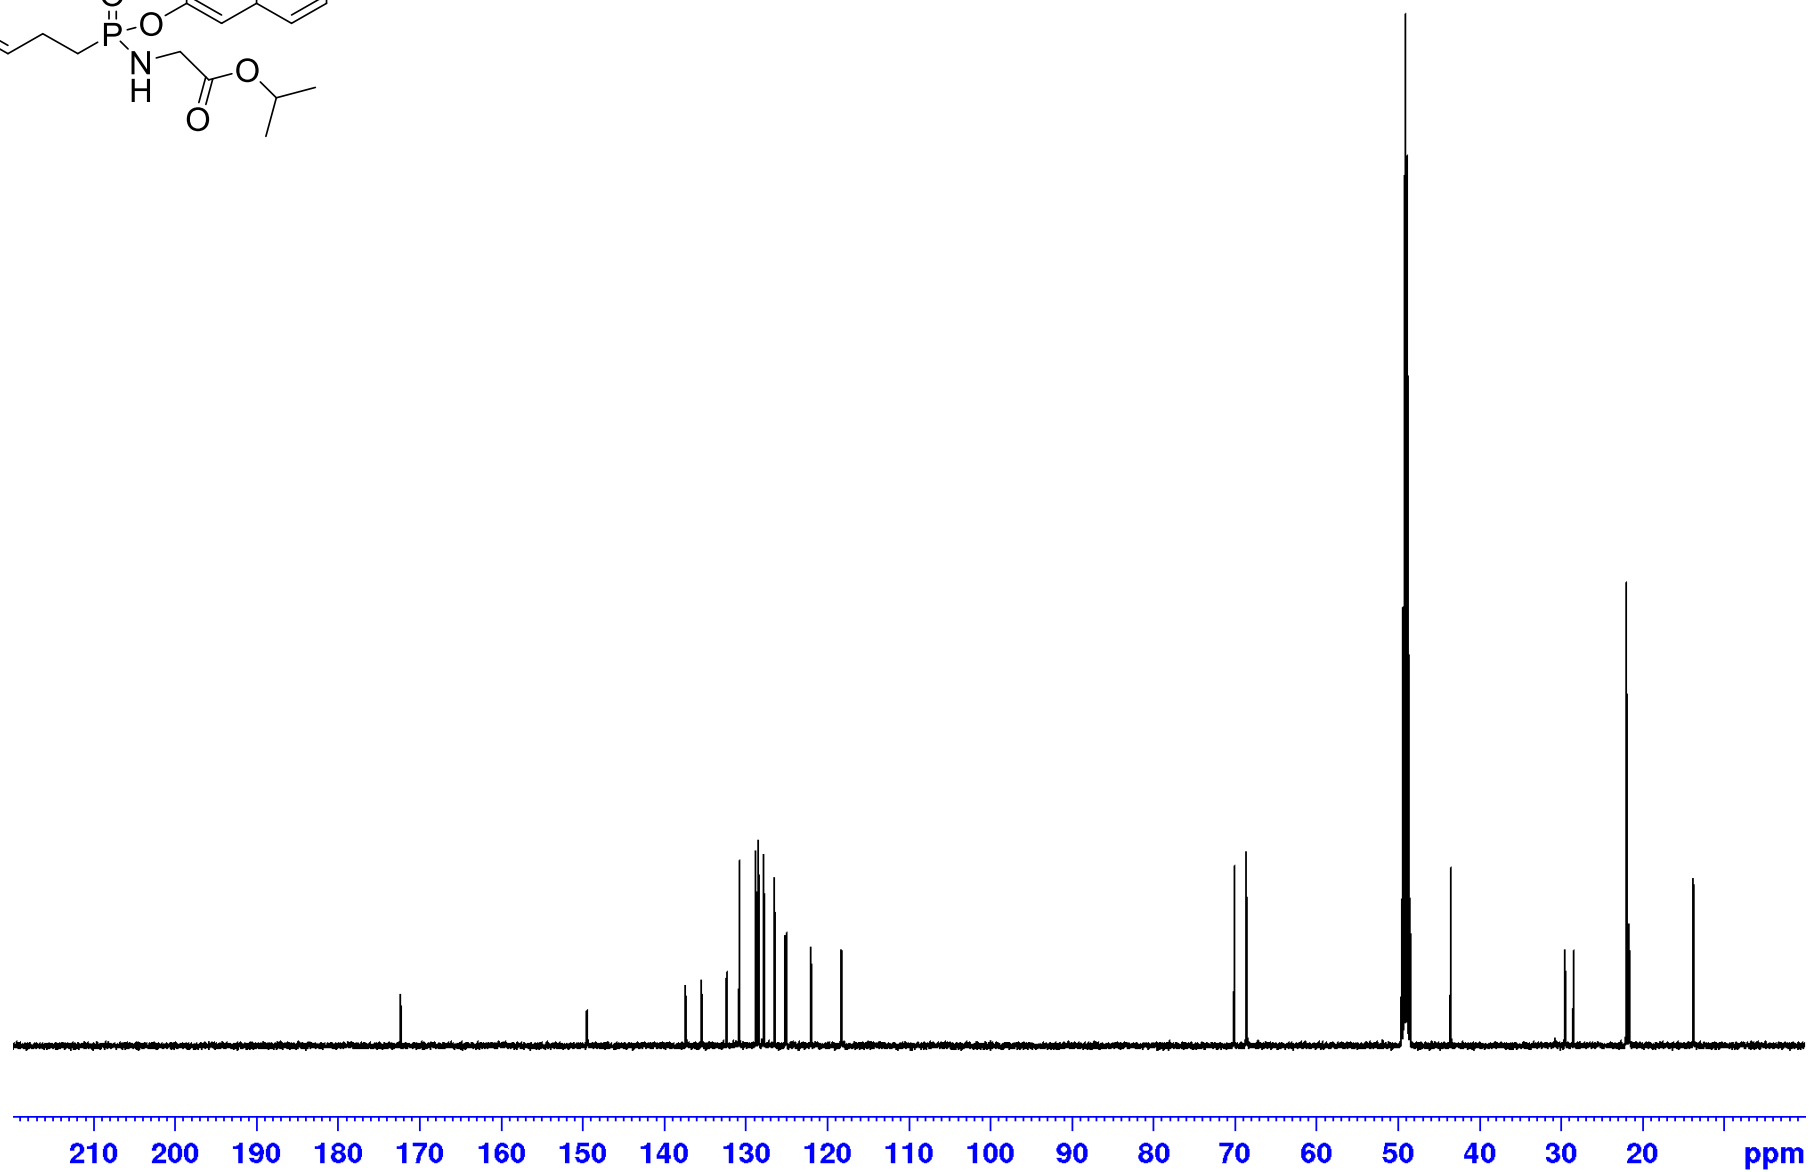

125 MHz  $^{13}\text{C}$  NMR spectrum of compound **9i**.

S31

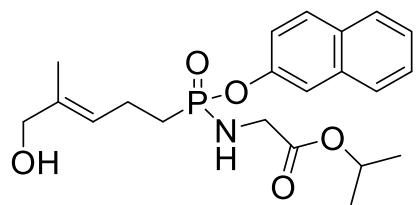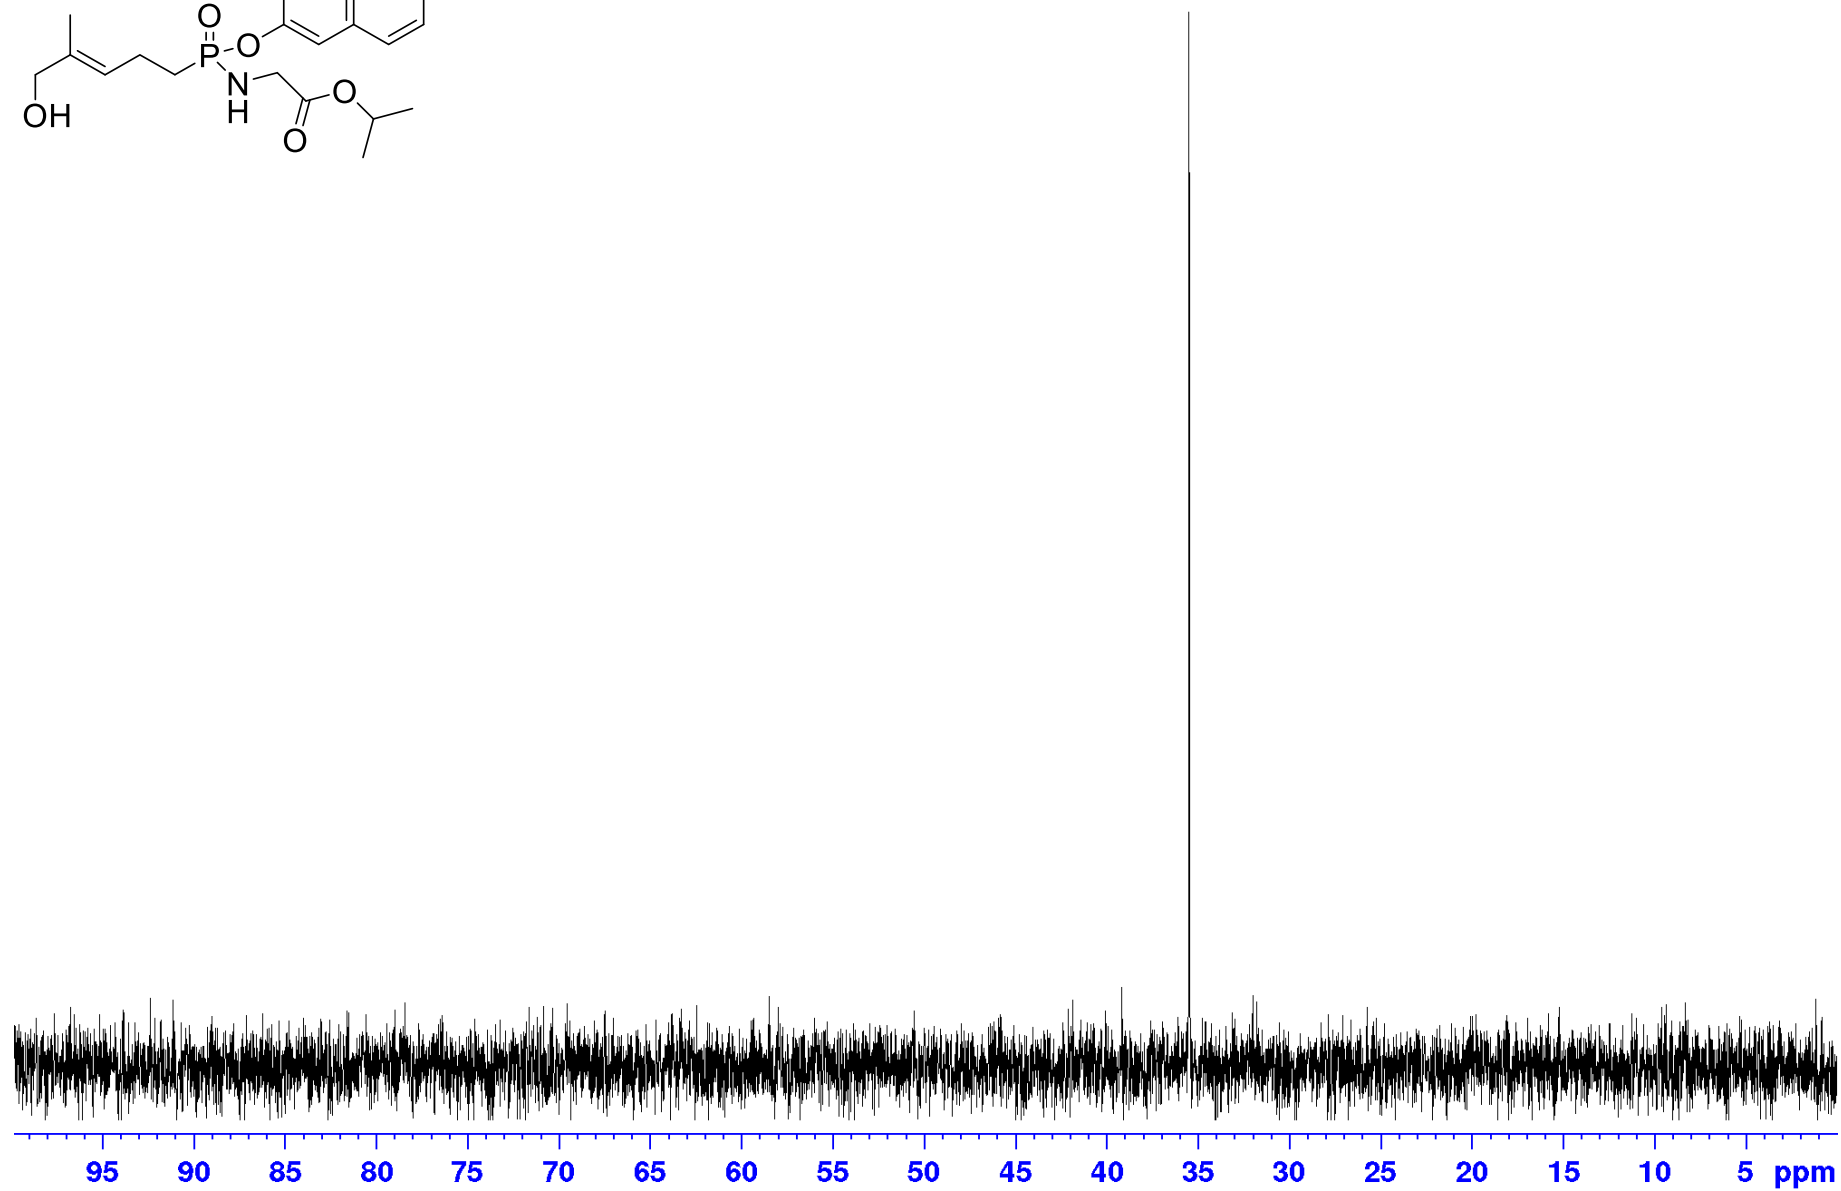

161 MHz  $^{31}\text{P}$  NMR spectrum of compound **9i**.



=====  
Acq. Operator : SYSTEM  
Sample Operator : SYSTEM  
Acq. Instrument : LC Location : 1 Injection Date : 3/17/2018  
5:12:39 PM

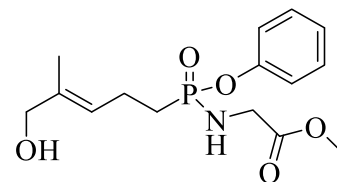

Inj Volume : Manually

Method : C:\Chem32\1\Methods\DBG.M  
Last changed : 3/17/2018 4:34:47 PM by SYSTEM  
(modified after loading)

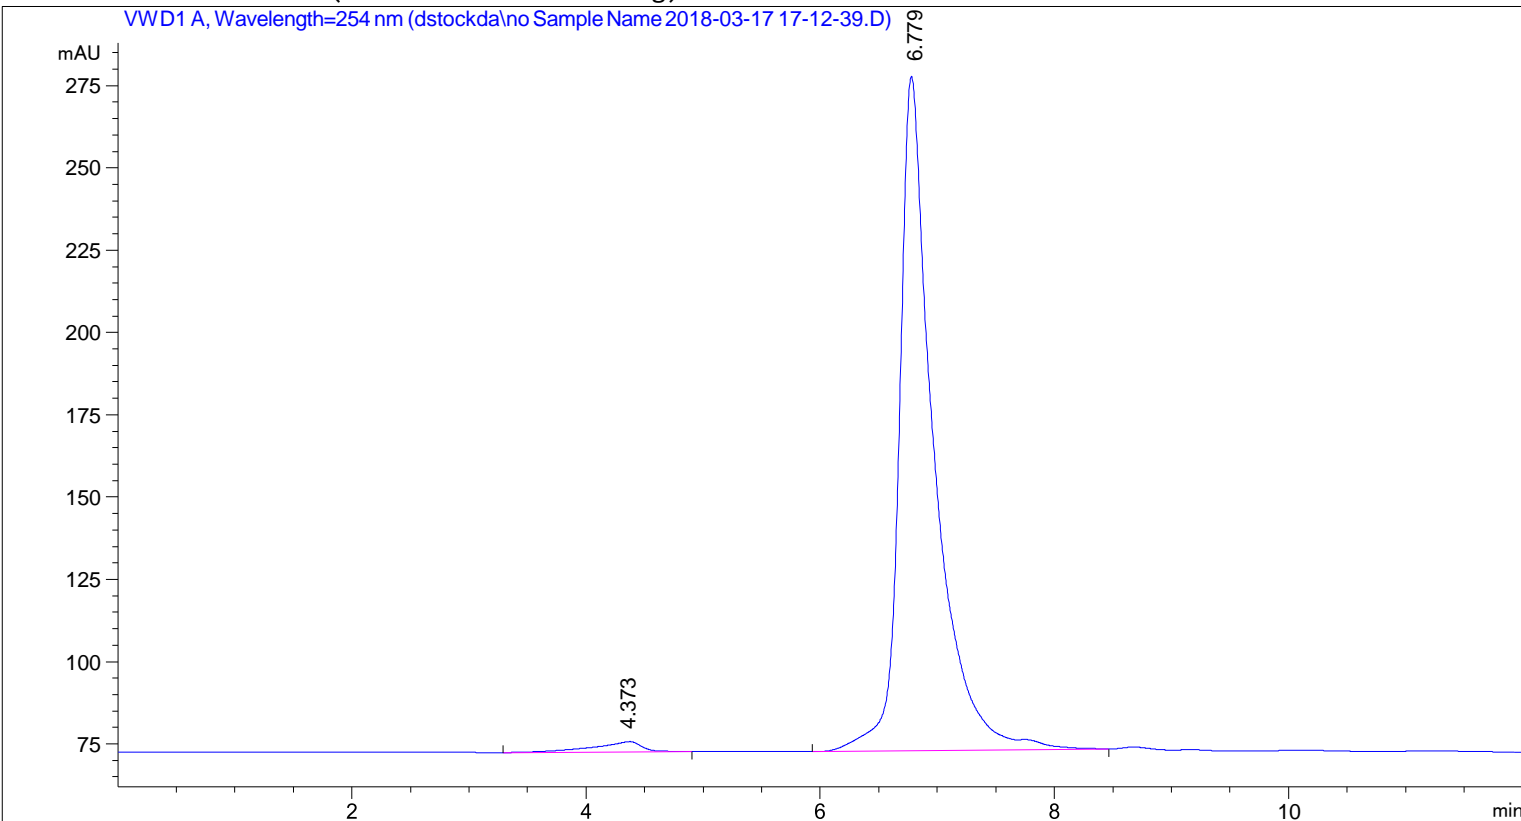

Sample Info : setup

=====  
Area Percent Report  
=====

Sorted By : Signal  
Multiplier : 1.0000  
Dilution : 1.0000  
Use Multiplier & Dilution Factor with ISTDs

Signal 1: VWD1 A, Wavelength=254 nm

| Peak # | RetTime [min] | Type | Width [min] | Area [mAU*s] | Height [mAU] | Area %  |
|--------|---------------|------|-------------|--------------|--------------|---------|
| 1      | 4.373         | BB   | 0.3746      | 91.13457     | 3.16796      | 2.1125  |
| 2      | 6.779         | BV R | 0.2874      | 4222.99219   | 204.91321    | 97.8875 |

Totals :                   4314.12676   208.08117

Data File C:\Chem32\1\Data\dstockda\no Sample Name 2018-03-17 17-12-39.D Sample Name:

\*\*\* End of Report \*\*\*

LC 3/17/2018 5:24:47 PM SYSTEM Page 2 of 2

Sample Name:

```
=====
Acq. Operator : SYSTEM
Sample Operator : SYSTEM
Acq. Instrument : LC Location : 1 Injection Date : 3/18/2018
4:24:00 PM
```

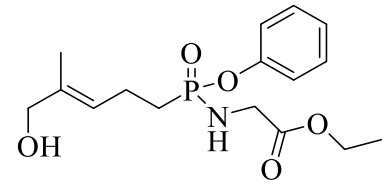

Inj Volume : Manually

```
Method : C:\Chem32\1\Methods\DBG.M
Last changed : 3/18/2018 4:07:56 PM by SYSTEM
(modified after loading)
```

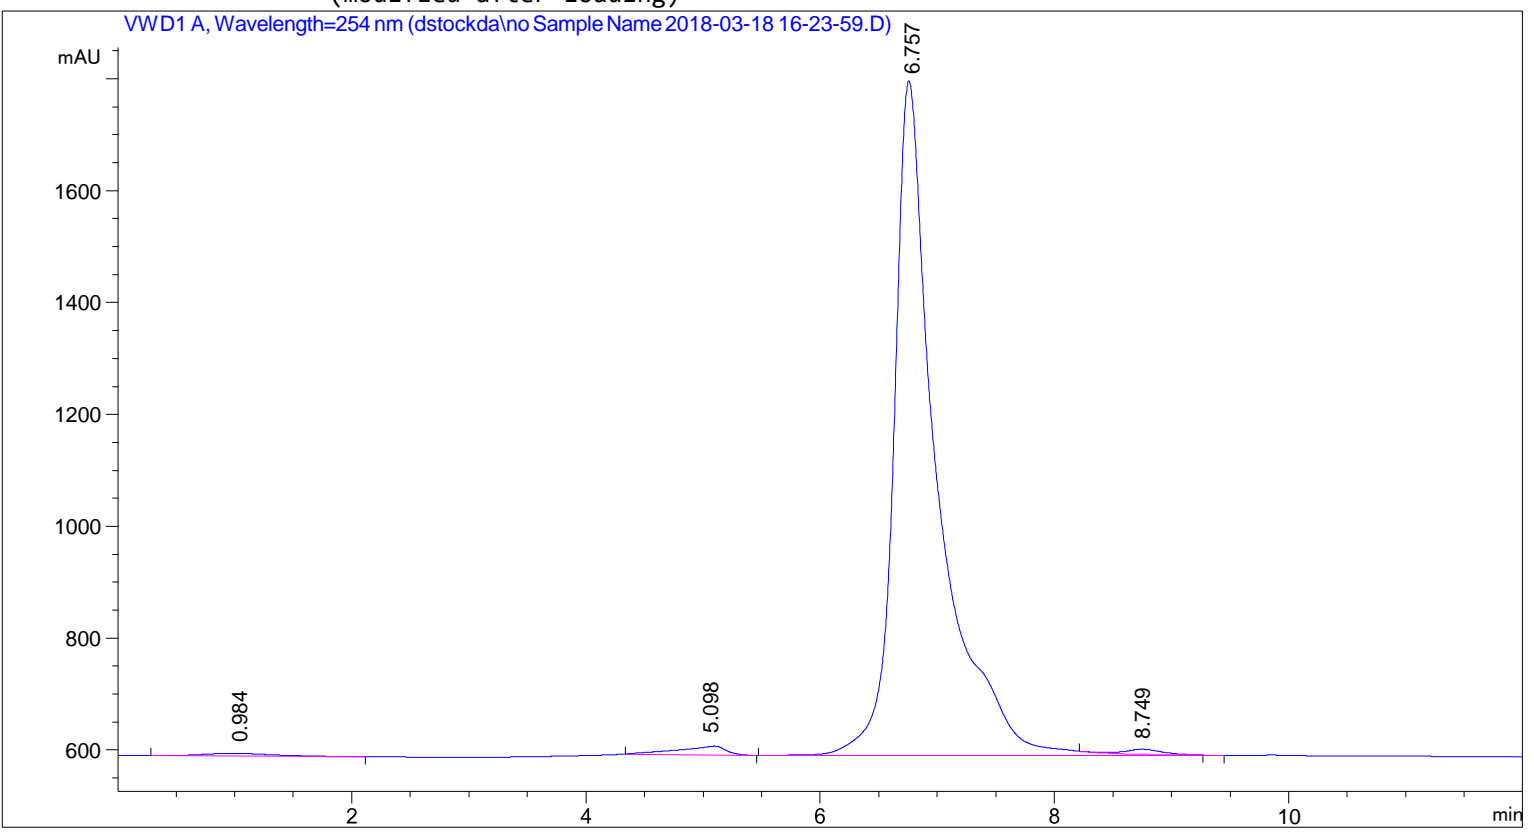

Sample Info : setup

```
=====
Area Percent Report
=====
```

```
Sorted By : Signal
Multiplier : 1.0000
Dilution : 1.0000
Use Multiplier & Dilution Factor with ISTDs
```

Signal 1: VWD1 A, Wavelength=254 nm

| Peak # | RetTime [min] | Type | Width [min] | Area [mAU*s] | Height [mAU] | Area %  |
|--------|---------------|------|-------------|--------------|--------------|---------|
| 1      | 0.984         | BB   | 0.6272      | 215.75067    | 5.09351      | 0.6751  |
| 2      | 5.098         | BB   | 0.3594      | 444.54996    | 15.88935     | 1.3910  |
| 3      | 6.757         | BV R | 0.3586      | 3.10892e4    | 1206.55933   | 97.2808 |
| 4      | 8.749         | VB E | 0.3372      | 208.70326    | 9.07957      | 0.6531  |

Totals : 3.19582e4 1236.62175

Data File C:\Chem32\1\Data\dstockda\no Sample Name 2018-03-18 16-23-59.D Sample Name:

=====

\*\*\* End of Report \*\*\*

LC 3/18/2018 4:36:08 PM SYSTEM Page 2 of 2

=====  
Acq. Operator : SYSTEM  
Sample Operator : SYSTEM  
Acq. Instrument : LC Location : 1 Injection Date : 3/18/2018  
12:20:32 PM

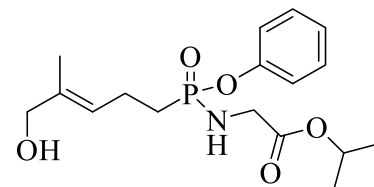

Inj Volume : Manually

Method : C:\Chem32\1\Methods\DBG.M

Last changed : 3/18/2018 11:50:37 AM by SYSTEM  
(modified after loading)

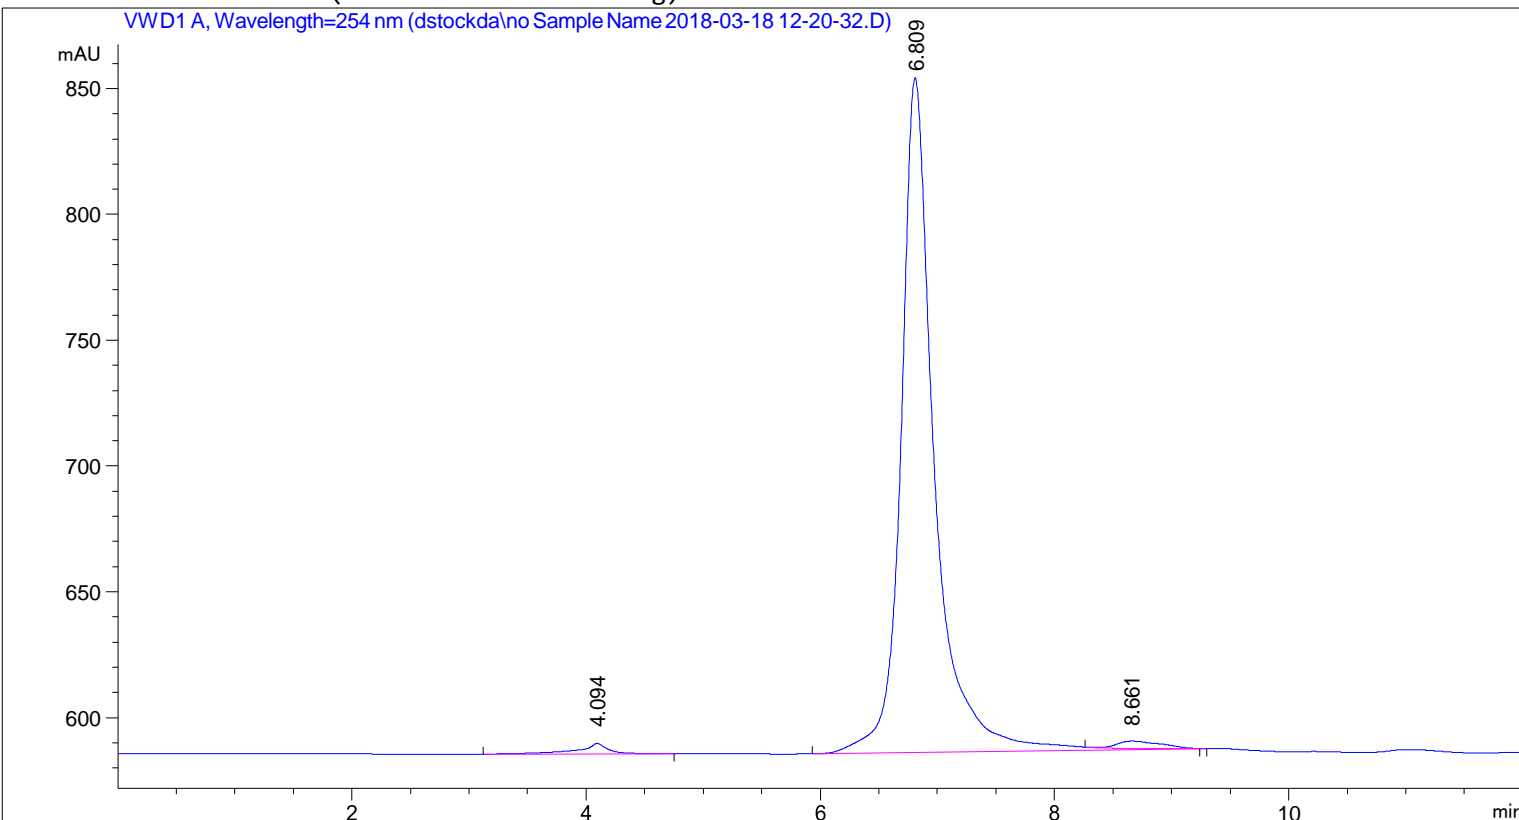

Sample Info : setup

=====  
Area Percent Report  
=====

Sorted By : Signal  
Multiplier : 1.0000  
Dilution : 1.0000  
Use Multiplier & Dilution Factor with ISTDs

Signal 1: VWD1 A, Wavelength=254 nm

| Peak # | RetTime [min] | Type | Width [min] | Area [mAU*s] | Height [mAU] | Area %  |
|--------|---------------|------|-------------|--------------|--------------|---------|
| 1      | 4.094         | BB   | 0.2391      | 75.29266     | 4.12175      | 1.3753  |
| 2      | 6.809         | BV R | 0.2855      | 5320.48193   | 268.16412    | 97.1819 |
| 3      | 8.661         | VB E | 0.3779      | 78.99346     | 2.98356      | 1.4429  |

Totals : 5474.76805 275.26942

Data File C:\Chem32\1\Data\dstockda\no Sample Name 2018-03-18 12-20-32.D Sample Name:

=====

\*\*\* End of Report \*\*\*

LC 3/18/2018 12:32:41 PM SYSTEM Page 2 of 2

Sample Name:

```
=====
Acq. Operator   : SYSTEM
Sample Operator : SYSTEM
Acq. Instrument : LC Location : 1 Injection Date : 3/21/2018
9:28:32 AM
```

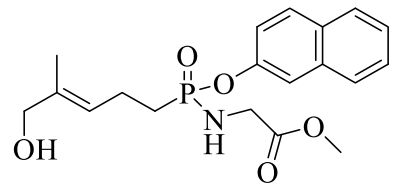

Inj Volume : Manually

```
Method : C:\Chem32\1\Methods\DBG.M
Last changed : 3/21/2018 9:13:17 AM by SYSTEM
(modified after loading)
```

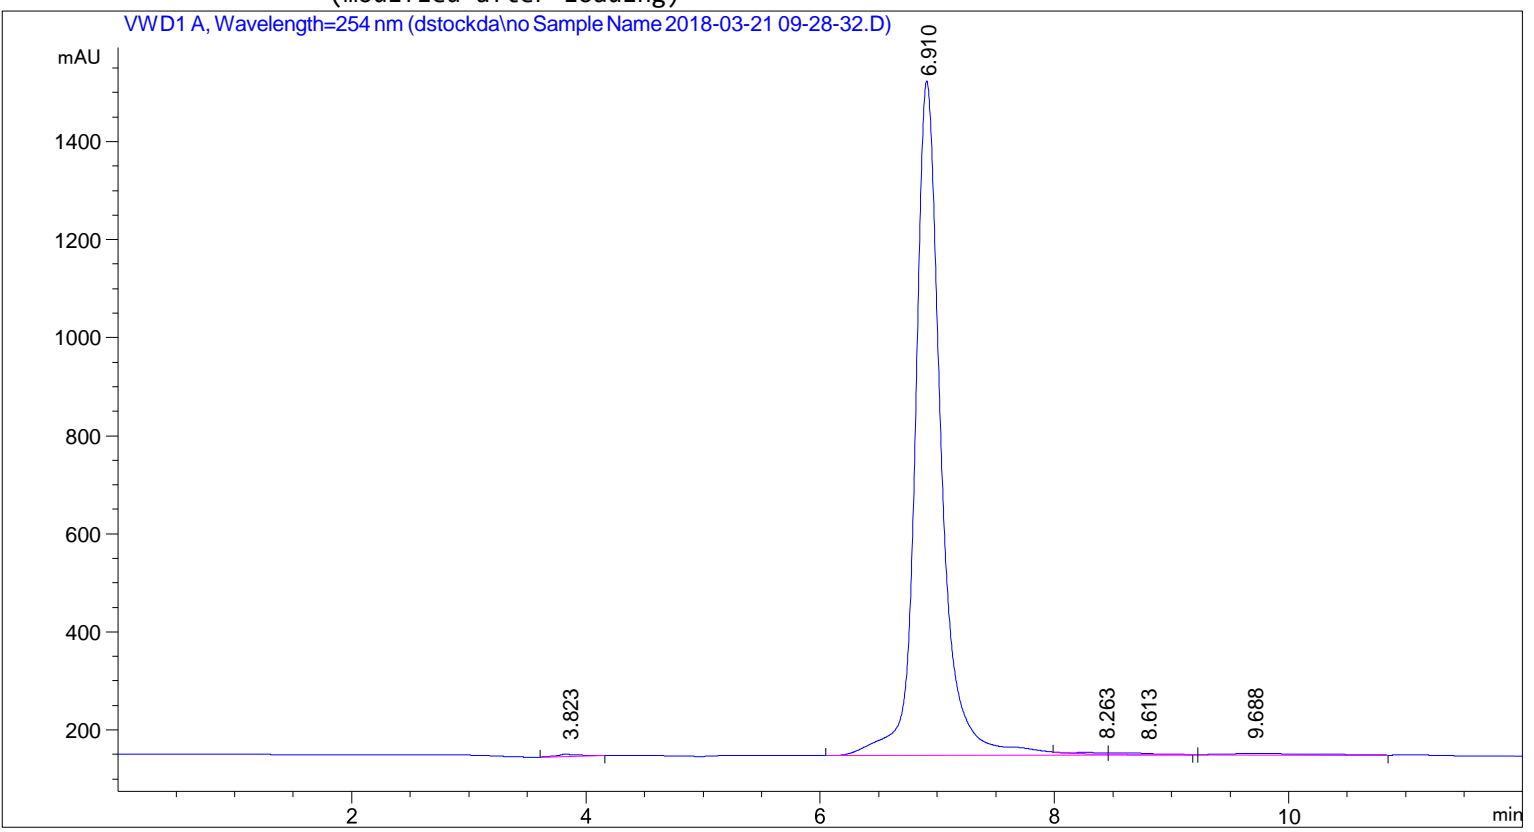

Sample Info : setup

```
=====
                          Area Percent Report
=====
```

```
Sorted By : Signal
Multiplier : 1.0000
Dilution : 1.0000
Use Multiplier & Dilution Factor with ISTDs
```

Signal 1: VWD1 A, Wavelength=254 nm

| Peak # | RetTime [min] | Type | Width [min] | Area [mAU*s] | Height [mAU] | Area %  |
|--------|---------------|------|-------------|--------------|--------------|---------|
| 1      | 3.823         | BB   | 0.1642      | 53.53941     | 4.39351      | 0.2479  |
| 2      | 6.910         | BV R | 0.2305      | 2.12870e4    | 1375.75159   | 98.5680 |
| 3      | 8.263         | VV E | 0.2542      | 52.19046     | 2.98114      | 0.2417  |
| 4      | 8.613         | VB E | 0.3034      | 79.28291     | 3.86300      | 0.3671  |
| 5      | 9.688         | BB   | 0.7372      | 124.24326    | 2.19897      | 0.5753  |

Totals : 2.15963e4 1389.18820

Data File C:\Chem32\1\Data\dstockda\no Sample Name 2018-03-21 09-28-32.D Sample Name:

=====

\*\*\* End of Report \*\*\*

LC 3/21/2018 9:40:44 AM SYSTEM Page 2 of 2



Sample Name:

=====

Acq. Operator : SYSTEM  
 Sample Operator : SYSTEM  
 Acq. Instrument : LC Location : 1 Injection Date : 3/20/2018  
 6:06:13 AM

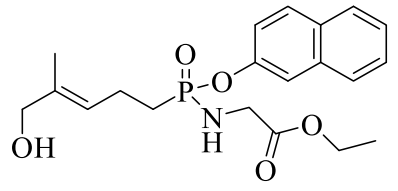

Inj Volume : Manually

Method : C:\Chem32\1\Methods\DBG.M  
 Last changed : 3/20/2018 5:35:34 AM by SYSTEM  
 (modified after loading)

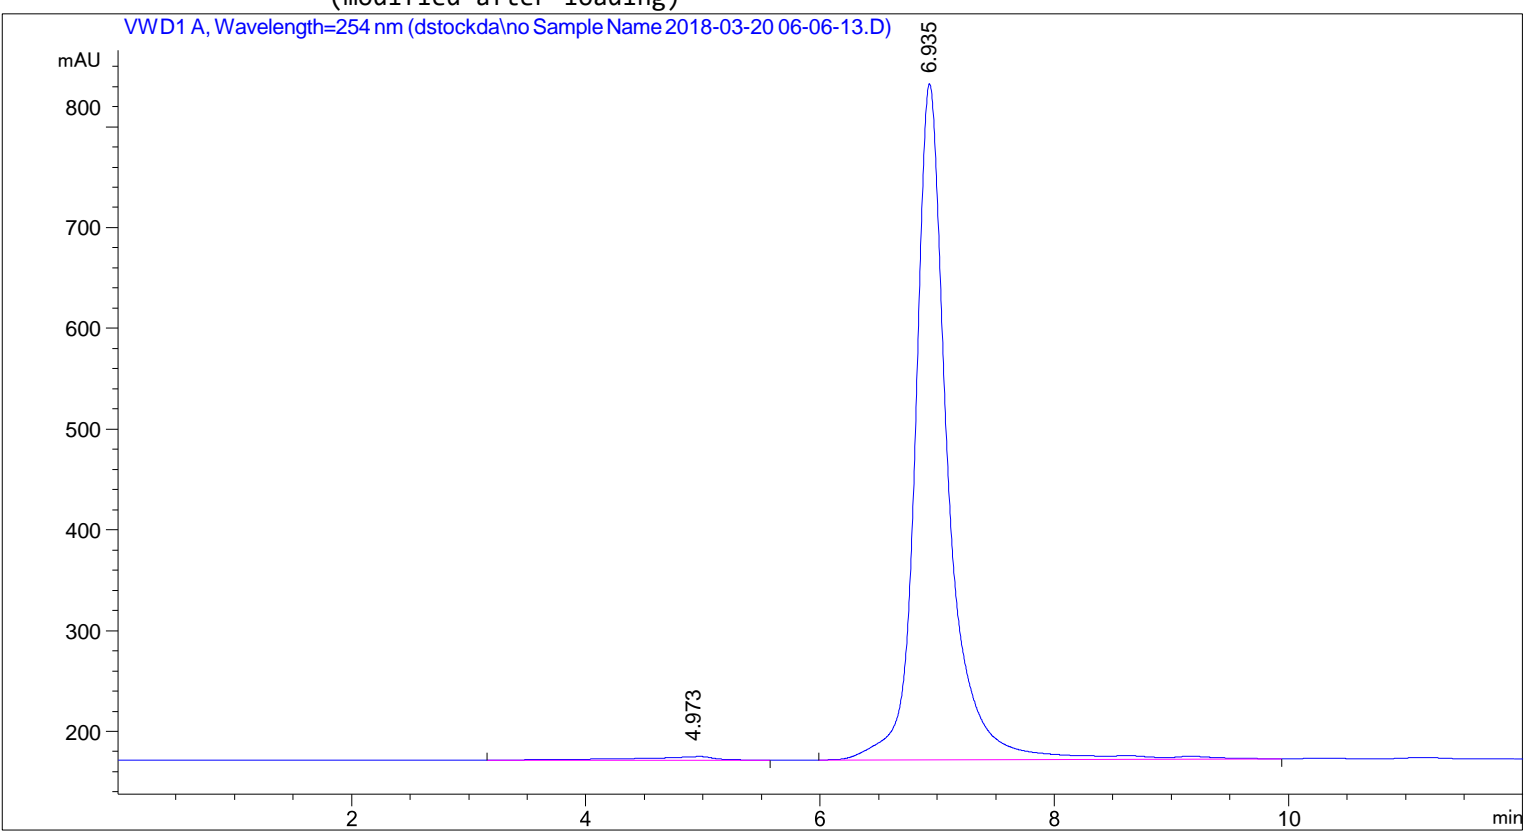

Sample Info : setup

=====  
 Area Percent Report  
 =====

Sorted By : Signal  
 Multiplier : 1.0000  
 Dilution : 1.0000  
 Use Multiplier & Dilution Factor with ISTDs

Signal 1: VWD1 A, Wavelength=254 nm

| Peak # | RetTime [min] | Type | Width [min] | Area [mAU*s] | Height [mAU] | Area %  |
|--------|---------------|------|-------------|--------------|--------------|---------|
| 1      | 4.973         | BB   | 0.5287      | 139.48842    | 3.35755      | 1.0547  |
| 2      | 6.935         | BV R | 0.2856      | 1.30855e4    | 670.82220    | 98.9453 |

Totals : 1.32250e4 674.17975

Data File C:\Chem32\1\Data\dstockda\no Sample Name 2018-03-20 06-06-13.D Sample Name:

\*\*\* End of Report \*\*\*

LC 3/20/2018 6:18:26 AM SYSTEM Page 2 of 2

Sample Name:

=====

Acq. Operator : SYSTEM  
 Sample Operator : SYSTEM  
 Acq. Instrument : LC Location : 1 Injection Date : 2/12/2018  
 6:10:20 AM

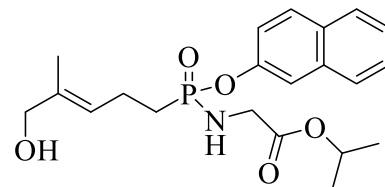

Inj Volume : Manually

Method : C:\CHEM32\1\METHODS\DBG.M  
 Last changed : 2/12/2018 6:18:22 AM by SYSTEM  
 (modified after loading)

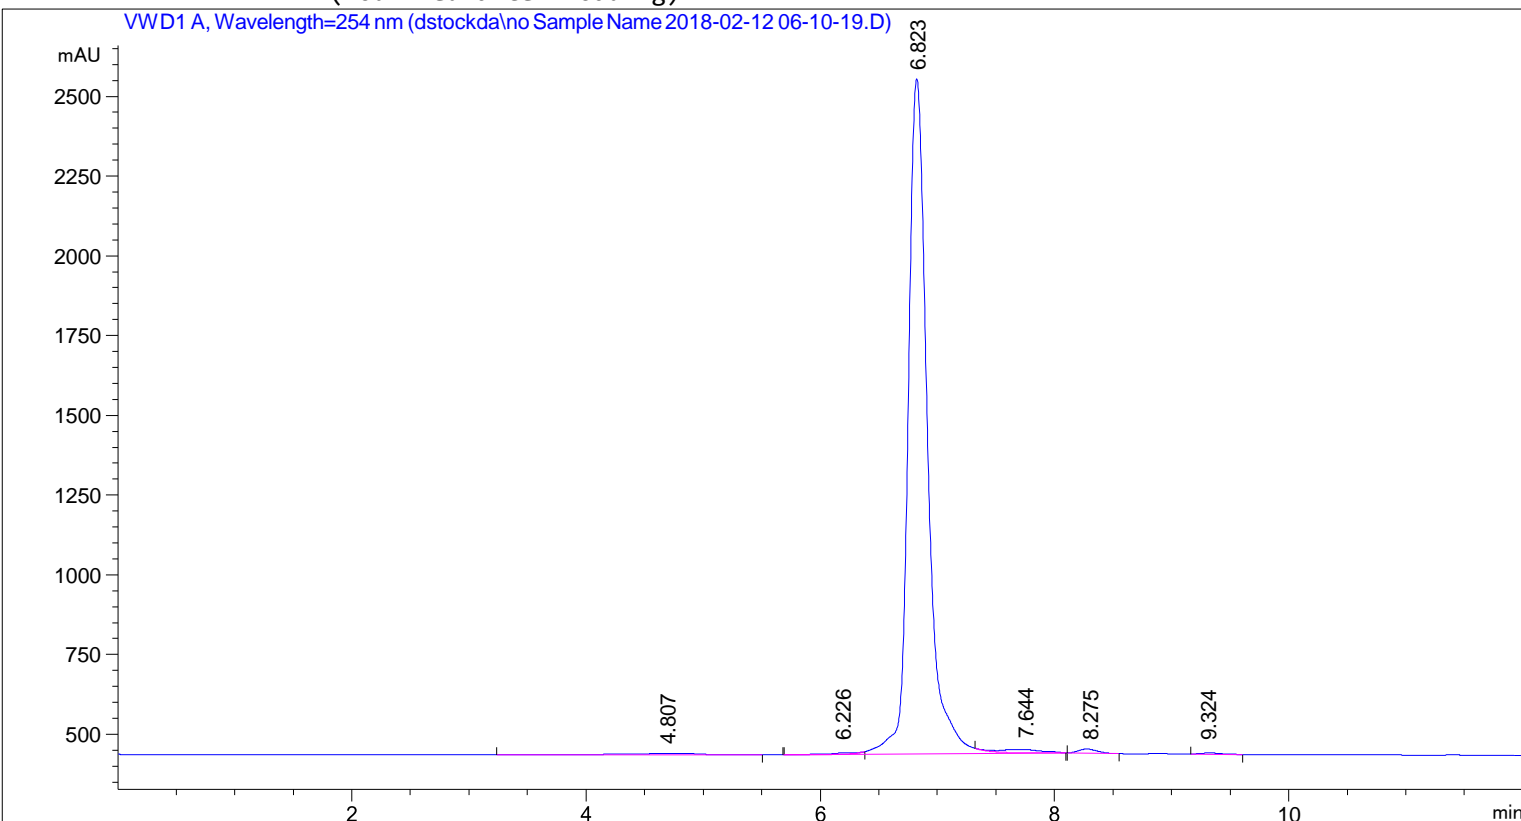

Sample Info : setup

=====

Area Percent Report

=====

Sorted By : Signal  
 Multiplier : 1.0000  
 Dilution : 1.0000  
 Use Multiplier & Dilution Factor with ISTDs

Signal 1: VWD1 A, Wavelength=254 nm

| Peak # | RetTime [min] | Type | Width [min] | Area [mAU*s] | Height [mAU] | Area %  |
|--------|---------------|------|-------------|--------------|--------------|---------|
| 1      | 4.807         | BB   | 0.5131      | 203.22459    | 5.08716      | 0.8122  |
| 2      | 6.226         | BV E | 0.2134      | 69.04517     | 4.49135      | 0.2759  |
| 3      | 6.823         | VV R | 0.1750      | 2.43073e4    | 2117.06567   | 97.1428 |
| 4      | 7.644         | VB E | 0.3208      | 255.67728    | 10.22311     | 1.0218  |
| 5      | 8.275         | BB   | 0.1725      | 144.00377    | 13.07846     | 0.5755  |
| 6      | 9.324         | BB   | 0.1733      | 42.98248     | 3.84805      | 0.1718  |

Data File C:\Chem32\1\Data\dstockda\no Sample Name 2018-02-12 06-10-19.D Sample Name:

Totals :                    2.50222e4    2153.79380

=====

\*\*\* End of Report \*\*\*

LC 2/12/2018 6:22:27 AM SYSTEM Page 2 of 2

=====

Acq. Operator : SYSTEM  
 Sample Operator : SYSTEM  
 Acq. Instrument : LC Location : 1 Injection Date : 3/11/2018  
 12:00:00 PM

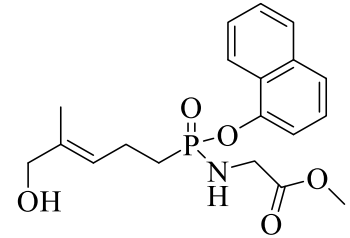

Inj Volume : Manually

Method : C:\Chem32\1\Methods\DBG.M

Last changed : 3/11/2018 12:11:49 PM by SYSTEM  
 (modified after loading)

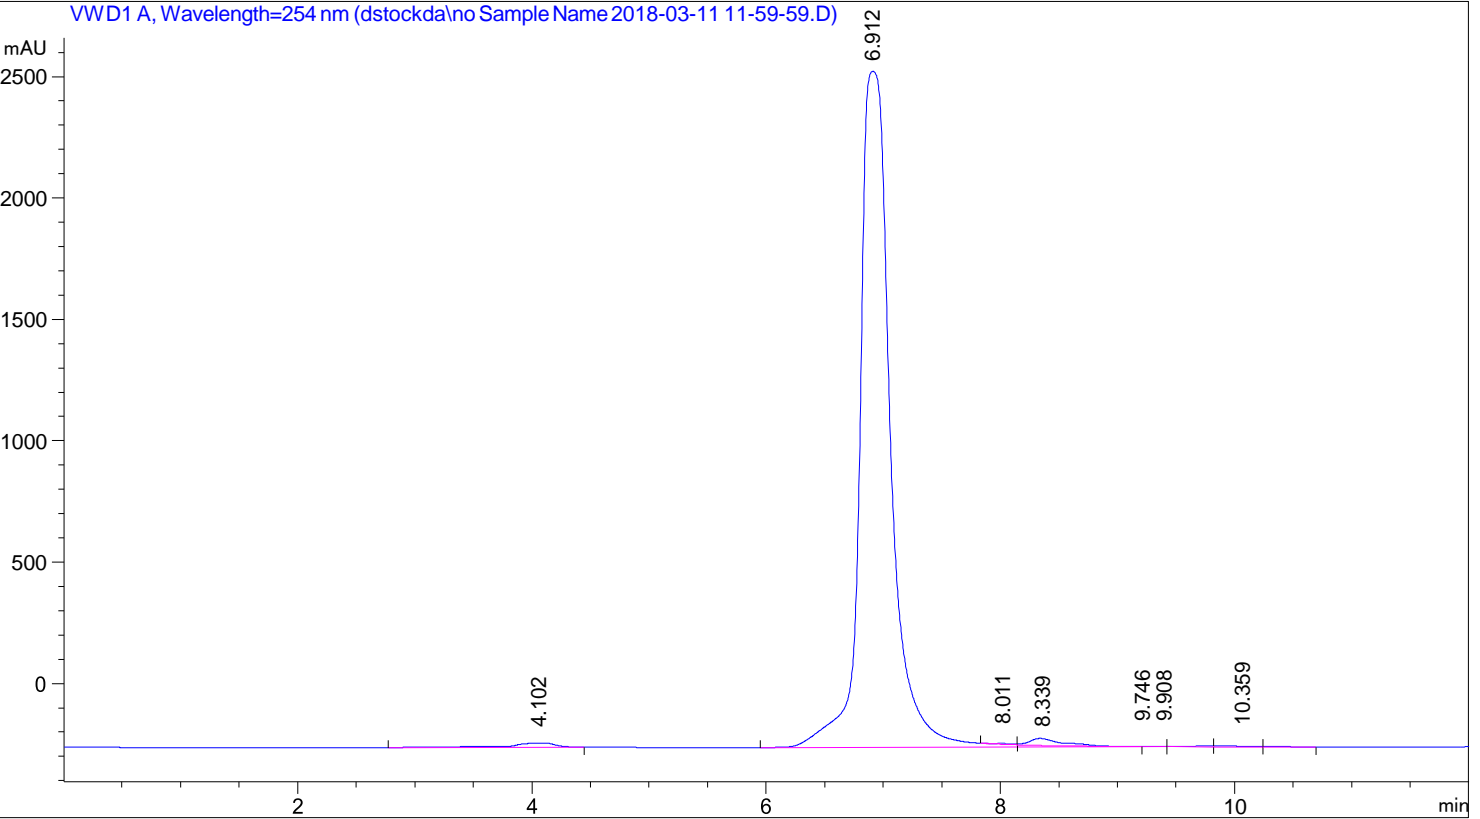

Sample Info : setup

=====  
 Area Percent Report  
 =====

Sorted By : Signal  
 Multiplier : 1.0000  
 Dilution : 1.0000  
 Use Multiplier & Dilution Factor with ISTDs

Signal 1: VWD1 A, Wavelength=254 nm

| Peak # | RetTime [min] | Type | Width [min] | Area [mAU*s] | Height [mAU] | Area %  |
|--------|---------------|------|-------------|--------------|--------------|---------|
| 1      | 4.102         | BB   | 0.4176      | 474.37180    | 17.15651     | 0.9104  |
| 2      | 6.912         | BV R | 0.2762      | 5.08821e4    | 2784.37109   | 97.6500 |
| 3      | 8.011         | VV E | 0.1821      | 40.49734     | 3.16870      | 0.0777  |
| 4      | 8.339         | VB E | 0.2748      | 566.17120    | 29.25097     | 1.0866  |
| 5      | 9.746         | BV   | 0.1804      | 40.49200     | 3.38813      | 0.0777  |
| 6      | 9.908         | VV   | 0.2832      | 70.92496     | 3.69145      | 0.1361  |
| 7      | 10.359        | VB   | 0.2362      | 32.02246     | 2.08428      | 0.0615  |

Data File C:\Chem32\1\Data\dstockda\no Sample Name 2018-03-11 11-59-59.D Sample Name:

| Peak # | RetTime [min] | Type | Width | Area [mAU*s] | Height [mAU] | Area % |
|--------|---------------|------|-------|--------------|--------------|--------|
| ----   | -----         | ---- | ----- | -----        | -----        | -----  |

Totals :                    5.21066e4 2843.11112

=====

\*\*\* End of Report \*\*\*

=====

Acq. Operator : SYSTEM  
 Sample Operator : SYSTEM  
 Acq. Instrument : LC Location : 1 Injection Date : 3/11/2018  
 12:26:16 PM

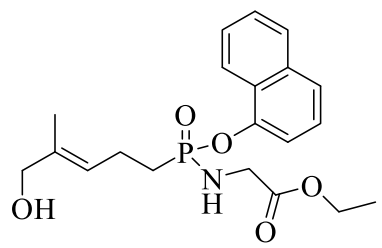

Inj Volume : Manually

Method : C:\Chem32\1\Methods\DBG.M

Last changed : 3/11/2018 12:11:49 PM by SYSTEM  
 (modified after loading)

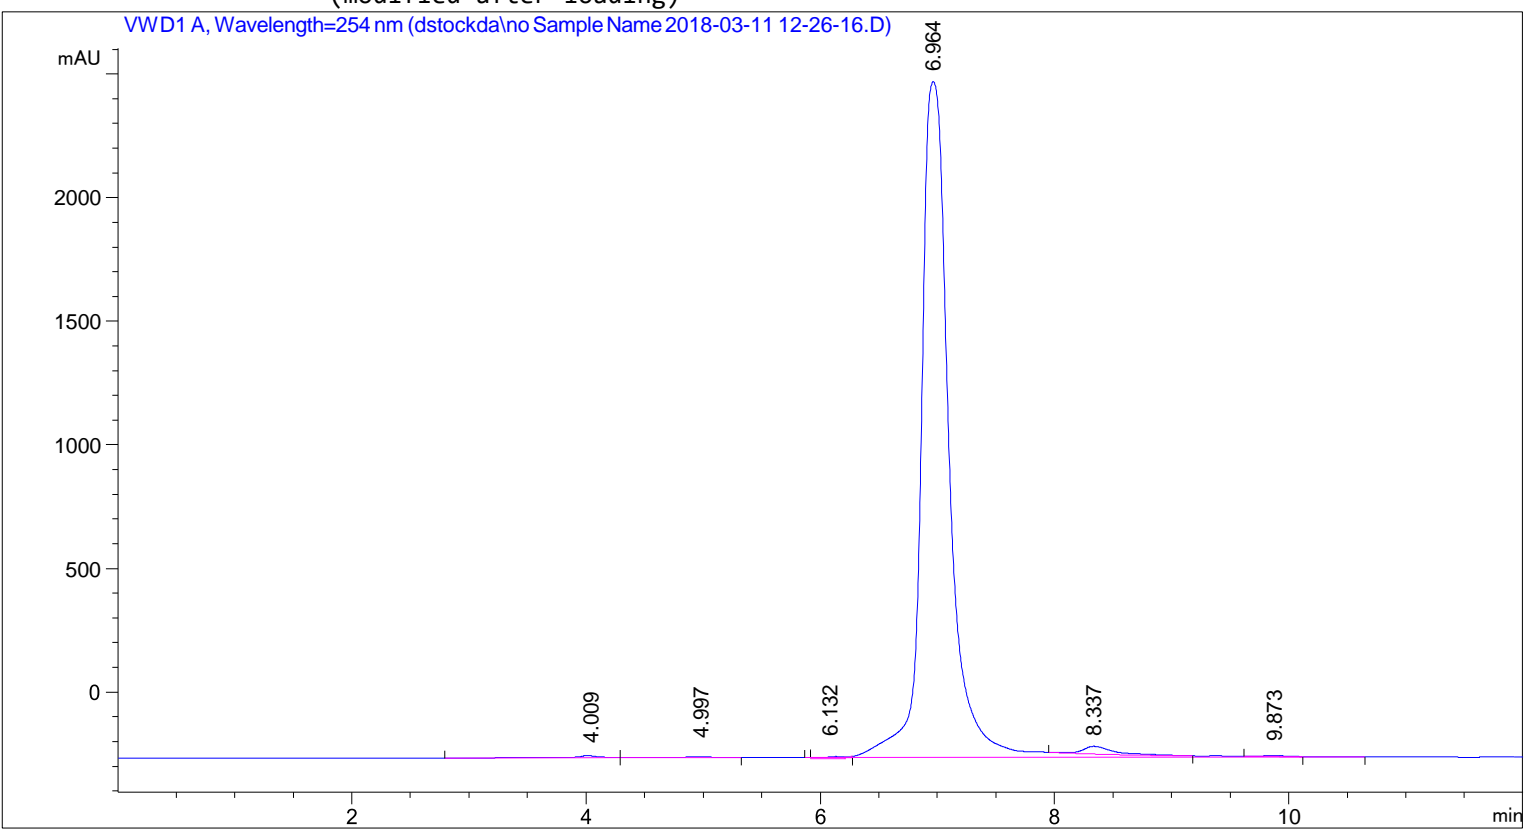

Sample Info : setup

=====  
 Area Percent Report  
 =====

Sorted By : Signal  
 Multiplier : 1.0000  
 Dilution : 1.0000  
 Use Multiplier & Dilution Factor with ISTDs

Signal 1: VWD1 A, Wavelength=254 nm

| Peak # | RetTime [min] | Type | Width [min] | Area [mAU*s] | Height [mAU] | Area %  |
|--------|---------------|------|-------------|--------------|--------------|---------|
| 1      | 4.009         | BV   | 0.1962      | 133.35913    | 9.14146      | 0.2822  |
| 2      | 4.997         | VB   | 0.4065      | 81.78371     | 2.57545      | 0.1731  |
| 3      | 6.132         | BV E | 0.1158      | 31.91494     | 4.14776      | 0.0675  |
| 4      | 6.964         | VV R | 0.2539      | 4.63662e4    | 2733.83179   | 98.1299 |
| 5      | 8.337         | VV E | 0.2723      | 581.95880    | 30.96692     | 1.2317  |
| 6      | 9.873         | VB E | 0.2682      | 54.58805     | 3.18075      | 0.1155  |

Data File C:\Chem32\1\Data\dstockda\no Sample Name 2018-03-11 12-26-16.D Sample Name:

Totals : 4.72498e4 2783.84412

=====

\*\*\* End of Report \*\*\*

LC 3/11/2018 12:38:24 PM SYSTEM Page 2 of 2



Sample Name:

=====

Acq. Operator : SYSTEM  
 Sample Operator : SYSTEM  
 Acq. Instrument : LC Location : 1 Injection Date : 3/11/2018  
 12:48:45 PM

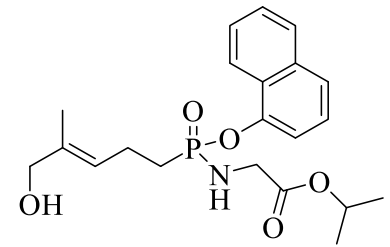

Inj Volume : Manually

Method : C:\Chem32\1\Methods\DBG.M

Last changed : 3/11/2018 12:11:49 PM by SYSTEM  
 (modified after loading)

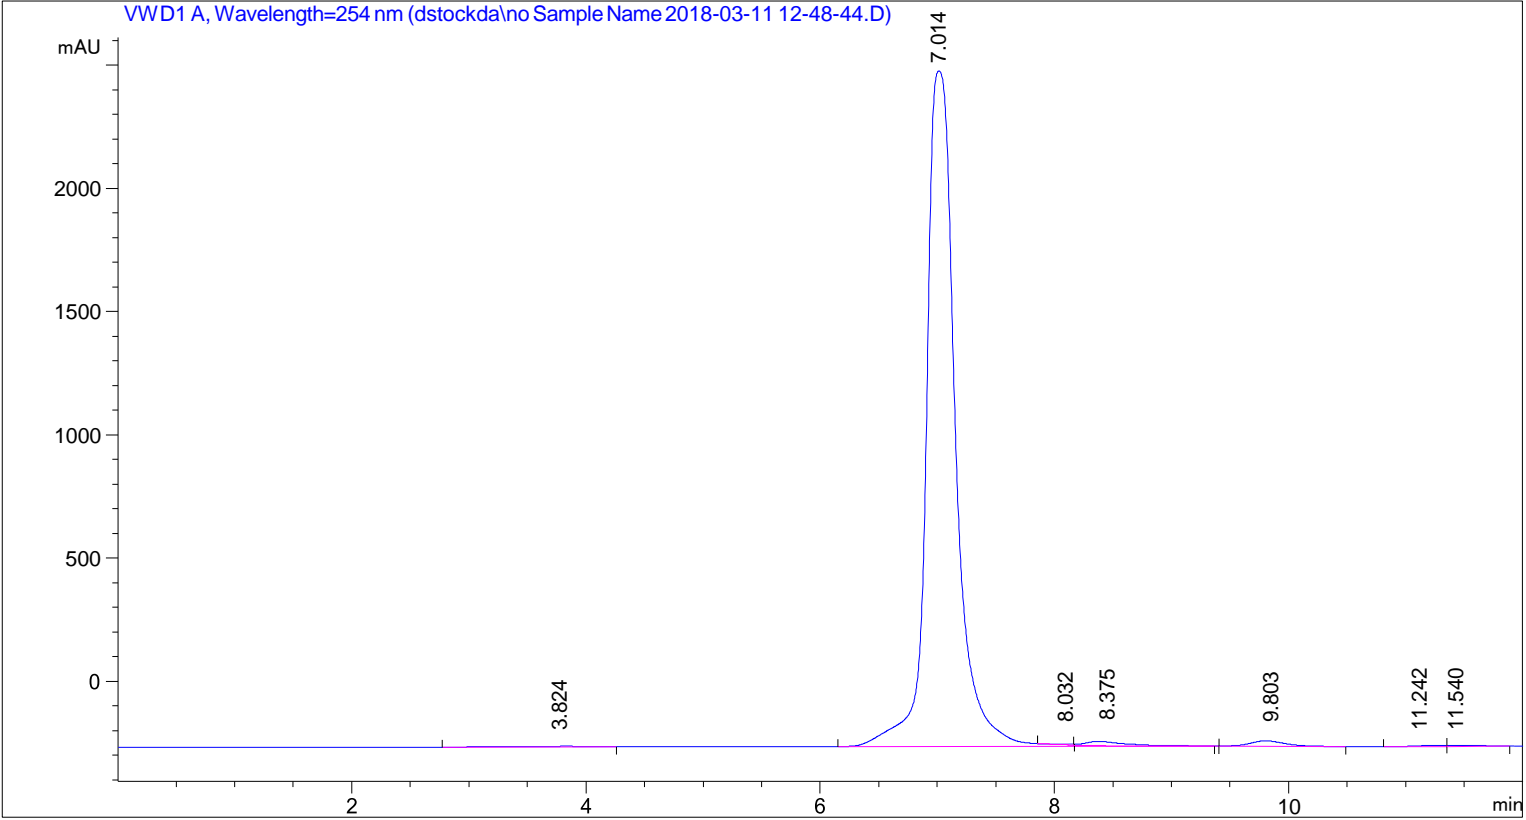

Sample Info : setup

=====  
 Area Percent Report  
 =====

Sorted By : Signal  
 Multiplier : 1.0000  
 Dilution : 1.0000  
 Use Multiplier & Dilution Factor with ISTDs

Signal 1: VWD1 A, Wavelength=254 nm

| Peak # | RetTime [min] | Type | Width [min] | Area [mAU*s] | Height [mAU] | Area %  |
|--------|---------------|------|-------------|--------------|--------------|---------|
| 1      | 3.824         | BB   | 0.2435      | 75.83086     | 3.99407      | 0.1567  |
| 2      | 7.014         | BV R | 0.2611      | 4.72505e4    | 2741.20605   | 97.6667 |
| 3      | 8.032         | VV E | 0.1996      | 39.39473     | 2.82656      | 0.0814  |
| 4      | 8.375         | VB E | 0.3370      | 425.68585    | 17.73633     | 0.8799  |
| 5      | 9.803         | BB   | 0.3004      | 429.37436    | 21.65242     | 0.8875  |
| 6      | 11.242        | BV   | 0.2394      | 66.09976     | 4.20517      | 0.1366  |
| 7      | 11.540        | VB   | 0.2978      | 92.42479     | 4.67272      | 0.1910  |

Data File C:\Chem32\1\Data\dstockda\no Sample Name 2018-03-11 12-48-44.D  
Sample Name:

| Peak #                                    | RetTime [min] | Type | Width [min] | Area [mAU*s] | Height [mAU] | Area % |
|-------------------------------------------|---------------|------|-------------|--------------|--------------|--------|
| ----- ----- ----- ----- ----- ----- ----- |               |      |             |              |              |        |
| Totals :                                  |               |      |             | 4.83793e4    | 2796.29333   |        |

=====  
\*\*\* End of Report \*\*\*
